# Supplementary material for: Preparation, COX-2 Inhibition and Anticancer Activity of Sclerotiorin Derivatives
Source: PubMed Central journal article supplement (PMC7823724; doi:10.3390/md19010012), 2020-12-29
Supplement: marinedrugs-19-00012-s001.pdf [file marinedrugs-19-00012-s001.pdf]

## Supporting Information

### Preparation, COX-2 Inhibition and Potent Anticancer Activity of Sclerotiorin Derivatives

Tao Chen<sup>1</sup>, Yun Huang<sup>2,3</sup>, Junxian Hong<sup>1</sup>, Xikang Wei<sup>1</sup>, Fang Zeng<sup>1</sup>, Jialin Li<sup>1</sup>, Geting Ye<sup>1</sup>, Jie Yuan<sup>2,\*</sup>, Yuhua Long<sup>1,\*</sup>

<sup>1</sup> School of Chemistry, Guangzhou Key Laboratory of Analytical Chemistry for Biomedicine, South China Normal University, Guangzhou 510006, PR China; 1660564371@qq.com (T.C.);

[1209256295@qq.com](mailto:1209256295@qq.com) (J.H.); [2855836968@qq.com](mailto:2855836968@qq.com) (X.W.); [874674100@qq.com](mailto:874674100@qq.com) (F.Z.);

605394658@qq.com (J.L.); 2779232198@qq.com (G.Y.); [longyh@scnu.edu.cn](mailto:longyh@scnu.edu.cn) (Y.L.)

<sup>2</sup> Department of Biochemistry, Zhongshan School of Medicine, Sun Yat-sen University, Guangzhou 510080, China; [yuanjie@mail.sysu.edu.cn](mailto:yuanjie@mail.sysu.edu.cn) (J.Y.)

<sup>3</sup> School of Basic Medical Sciences, Southern Medical University, Guangzhou 510515, China; [wyl2014@163.com](mailto:wyl2014@163.com) (Y.H.)

\* Correspondence: [longyh@scnu.edu.cn](mailto:longyh@scnu.edu.cn) (Y.L.); [yuanjie@mail.sysu.edu.cn](mailto:yuanjie@mail.sysu.edu.cn) (J. Y.)

## CONTENT

|                                                                                         |    |
|-----------------------------------------------------------------------------------------|----|
| Fig.S1. MS spectrum of compound 1.....                                                  | 1  |
| Fig.S2. <sup>1</sup> H NMR (600 MHz, CDCl <sub>3</sub> ) spectrum of compound 1.....    | 1  |
| Fig.S3. <sup>13</sup> C NMR (150 MHz, CDCl <sub>3</sub> ) spectrum of compound 1.....   | 2  |
| Fig.S4. MS spectrum of compound 2.....                                                  | 2  |
| Fig.S5. <sup>1</sup> H NMR (600 MHz, CDCl <sub>3</sub> ) spectrum of compound 2.....    | 3  |
| Fig.S6. <sup>13</sup> C NMR (150 MHz, CDCl <sub>3</sub> ) spectrum of compound 2.....   | 3  |
| Fig.S7. HRMS spectrum of compound 3.....                                                | 4  |
| Fig.S8. <sup>1</sup> H NMR (600 MHz, CDCl <sub>3</sub> ) spectrum of compound 3.....    | 4  |
| Fig.S9. <sup>13</sup> C NMR (150 MHz, CDCl <sub>3</sub> ) spectrum of compound 3.....   | 5  |
| Fig.S10. HRMS spectrum of compound 4.....                                               | 5  |
| Fig.S11. <sup>1</sup> H NMR (600 MHz, CD <sub>3</sub> OD) spectrum of compound 4.....   | 6  |
| Fig.S12. <sup>13</sup> C NMR (150 MHz, CD <sub>3</sub> OD) spectrum of compound 4.....  | 6  |
| Fig.S13. HRMS spectrum of compound 5.....                                               | 7  |
| Fig.S14. <sup>1</sup> H NMR (600 MHz, CDCl <sub>3</sub> ) spectrum of compound 5.....   | 7  |
| Fig.S15. <sup>13</sup> C NMR (150 MHz, CDCl <sub>3</sub> ) spectrum of compound 5.....  | 8  |
| Fig.S16. HRMS spectrum of compound 6.....                                               | 8  |
| Fig.S17. <sup>1</sup> H NMR (600 MHz, CDCl <sub>3</sub> ) spectrum of compound 6.....   | 9  |
| Fig.S18. <sup>13</sup> C NMR (150 MHz, CDCl <sub>3</sub> ) spectrum of compound 6.....  | 9  |
| Fig.S19. HRMS spectrum of compound 7.....                                               | 10 |
| Fig.S20. <sup>1</sup> H NMR (600 MHz, CDCl <sub>3</sub> ) spectrum of compound 7.....   | 10 |
| Fig.S21. <sup>13</sup> C NMR (150 MHz, CDCl <sub>3</sub> ) spectrum of compound 7.....  | 11 |
| Fig.S22. HRMS spectrum of compound 8.....                                               | 11 |
| Fig.S23. <sup>1</sup> H NMR (600 MHz, CDCl <sub>3</sub> ) spectrum of compound 8.....   | 12 |
| Fig.S24. <sup>13</sup> C NMR (150 MHz, CDCl <sub>3</sub> ) spectrum of compound 8.....  | 12 |
| Fig.S25. MS spectrum of compound 9.....                                                 | 13 |
| Fig.S26. <sup>1</sup> H NMR (600 MHz, CDCl <sub>3</sub> ) spectrum of compound 9.....   | 13 |
| Fig.S27. HRMS spectrum of compound 10.....                                              | 14 |
| Fig.S28. <sup>1</sup> H NMR (600 MHz, CDCl <sub>3</sub> ) spectrum of compound 10.....  | 14 |
| Fig.S29. <sup>13</sup> C NMR (150 MHz, CDCl <sub>3</sub> ) spectrum of compound 10..... | 15 |
| Fig.S30. HRMS spectrum of compound 11.....                                              | 15 |
| Fig.S31. <sup>1</sup> H NMR (600 MHz, CDCl <sub>3</sub> ) spectrum of compound 11.....  | 16 |
| Fig.S32. <sup>13</sup> C NMR (150 MHz, CDCl <sub>3</sub> ) spectrum of compound 11..... | 16 |
| Fig.S33. MS spectrum of compound 12.....                                                | 17 |

|                                                                                          |    |
|------------------------------------------------------------------------------------------|----|
| Fig.S34. <sup>1</sup> H NMR (600 MHz, CDCl <sub>3</sub> ) spectrum of compound 12 .....  | 17 |
| Fig.S35. HRMS spectrum of compound 13 .....                                              | 18 |
| Fig.S36. <sup>1</sup> H NMR (600 MHz, CDCl <sub>3</sub> ) spectrum of compound 13 .....  | 18 |
| Fig.S37. <sup>13</sup> C NMR (150 MHz, CDCl <sub>3</sub> ) spectrum of compound 13 ..... | 19 |
| Fig.S38. HRMS spectrum of compound 14 .....                                              | 19 |
| Fig.S39. <sup>1</sup> H NMR (600 MHz, CDCl <sub>3</sub> ) spectrum of compound 14 .....  | 20 |
| Fig.S40. <sup>13</sup> C NMR (150 MHz, CDCl <sub>3</sub> ) spectrum of compound 14 ..... | 20 |
| Fig.S41. MS spectrum of compound 15 .....                                                | 21 |
| Fig.S42. <sup>1</sup> H NMR (600 MHz, CDCl <sub>3</sub> ) spectrum of compound 15 .....  | 21 |
| Fig.S43. <sup>13</sup> C NMR (150 MHz, CDCl <sub>3</sub> ) spectrum of compound 15 ..... | 22 |
| Fig.S44. MS spectrum of compound 16 .....                                                | 22 |
| Fig.S45. <sup>1</sup> H NMR (600 MHz, CDCl <sub>3</sub> ) spectrum of compound 16 .....  | 23 |
| Fig.S46. <sup>13</sup> C NMR (150 MHz, CDCl <sub>3</sub> ) spectrum of compound 16 ..... | 23 |
| Fig.S47. HRMS spectrum of compound 17 .....                                              | 24 |
| Fig.S48. <sup>1</sup> H NMR (600 MHz, CDCl <sub>3</sub> ) spectrum of compound 17 .....  | 24 |
| Fig.S49. <sup>13</sup> C NMR (150 MHz, CDCl <sub>3</sub> ) spectrum of compound 17 ..... | 25 |
| Fig.S50. HRMS spectrum of compound 18 .....                                              | 25 |
| Fig.S51. <sup>1</sup> H NMR (600 MHz, CDCl <sub>3</sub> ) spectrum of compound 18 .....  | 26 |
| Fig.S52. <sup>13</sup> C NMR (150 MHz, CDCl <sub>3</sub> ) spectrum of compound 18 ..... | 26 |
| Fig.S53. HRMS spectrum of compound 19 .....                                              | 27 |
| Fig.S54. <sup>1</sup> H NMR (600 MHz, CDCl <sub>3</sub> ) spectrum of compound 19 .....  | 27 |
| Fig.S55. <sup>13</sup> C NMR (150 MHz, CDCl <sub>3</sub> ) spectrum of compound 19 ..... | 28 |
| Fig.S56. HRMS spectrum of compound 20 .....                                              | 28 |
| Fig.S57. <sup>1</sup> H NMR (600 MHz, CDCl <sub>3</sub> ) spectrum of compound 20 .....  | 29 |
| Fig.S58. <sup>13</sup> C NMR (150 MHz, CDCl <sub>3</sub> ) spectrum of compound 20 ..... | 29 |
| Fig.S59. HRMS spectrum of compound 21 .....                                              | 30 |
| Fig.S60. <sup>1</sup> H NMR (600 MHz, CDCl <sub>3</sub> ) spectrum of compound 21 .....  | 30 |
| Fig.S61. <sup>13</sup> C NMR (150 MHz, CDCl <sub>3</sub> ) spectrum of compound 21 ..... | 31 |
| Fig.S62. MS spectrum of compound 22 .....                                                | 31 |
| Fig.S63. <sup>1</sup> H NMR (600 MHz, CDCl <sub>3</sub> ) spectrum of compound 22 .....  | 32 |
| Fig.S64. <sup>13</sup> C NMR (150 MHz, CDCl <sub>3</sub> ) spectrum of compound 22 ..... | 32 |
| Fig.S65. HRMS spectrum of compound 23 .....                                              | 33 |
| Fig.S66. <sup>1</sup> H NMR (600 MHz, CDCl <sub>3</sub> ) spectrum of compound 23 .....  | 33 |
| Fig.S67. <sup>13</sup> C NMR (150 MHz, CDCl <sub>3</sub> ) spectrum of compound 23 ..... | 34 |

|                                                                                          |    |
|------------------------------------------------------------------------------------------|----|
| Fig.S68. HRMS spectrum of compound 24 .....                                              | 34 |
| Fig.S69. <sup>1</sup> H NMR (600 MHz, CDCl <sub>3</sub> ) spectrum of compound 24 .....  | 35 |
| Fig.S70. <sup>13</sup> C NMR (150 MHz, CDCl <sub>3</sub> ) spectrum of compound 24 ..... | 35 |
| Fig.S71. HRMS spectrum of compound 25 .....                                              | 36 |
| Fig.S72. <sup>1</sup> H NMR (600 MHz, CDCl <sub>3</sub> ) spectrum of compound 25 .....  | 36 |
| Fig.S73. <sup>13</sup> C NMR (150 MHz, CDCl <sub>3</sub> ) spectrum of compound 25 ..... | 37 |
| Fig.S74. HRMS spectrum of compound 26 .....                                              | 38 |
| Fig.S75. <sup>1</sup> H NMR (600 MHz, CDCl <sub>3</sub> ) spectrum of compound 26 .....  | 38 |
| Fig.S76. <sup>13</sup> C NMR (150 MHz, CDCl <sub>3</sub> ) spectrum of compound 26 ..... | 38 |
| Fig.S77. HRMS spectrum of compound 27 .....                                              | 39 |
| Fig.S78. <sup>1</sup> H NMR (600 MHz, CDCl <sub>3</sub> ) spectrum of compound 27 .....  | 40 |
| Fig.S79. <sup>13</sup> C NMR (150 MHz, CDCl <sub>3</sub> ) spectrum of compound 27 ..... | 40 |

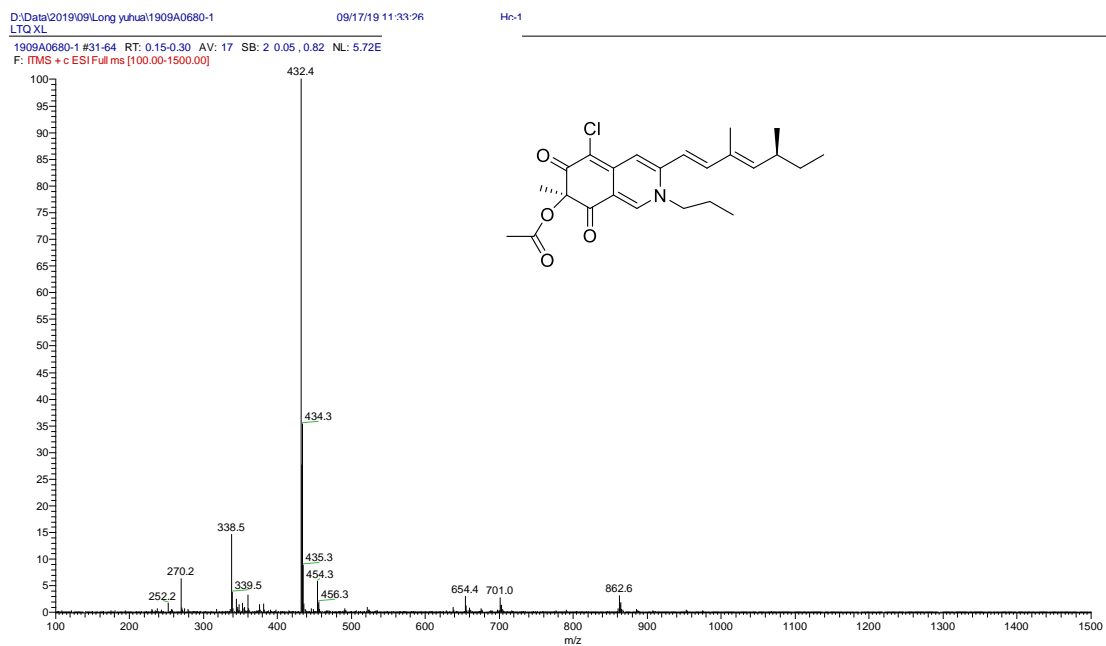

Fig.S1. MS spectrum of compound 1

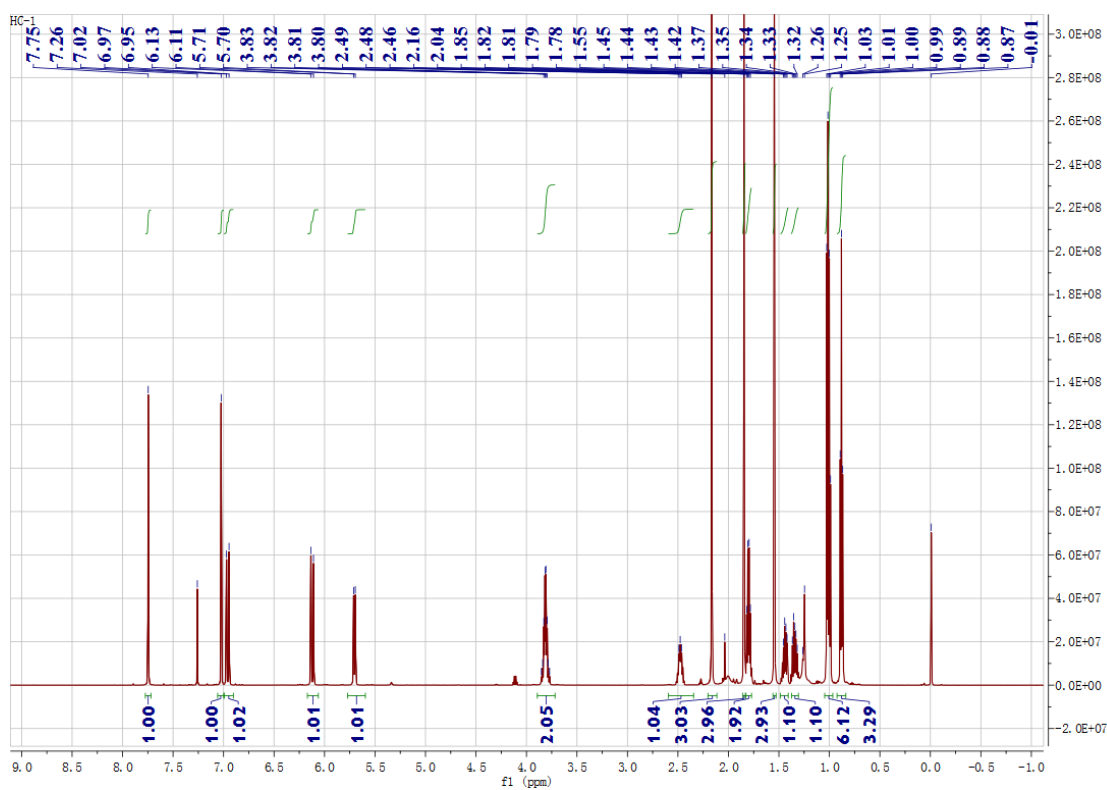

Fig.S2. <sup>1</sup>H NMR (600 MHz, CDCl<sub>3</sub>) spectrum of compound 1

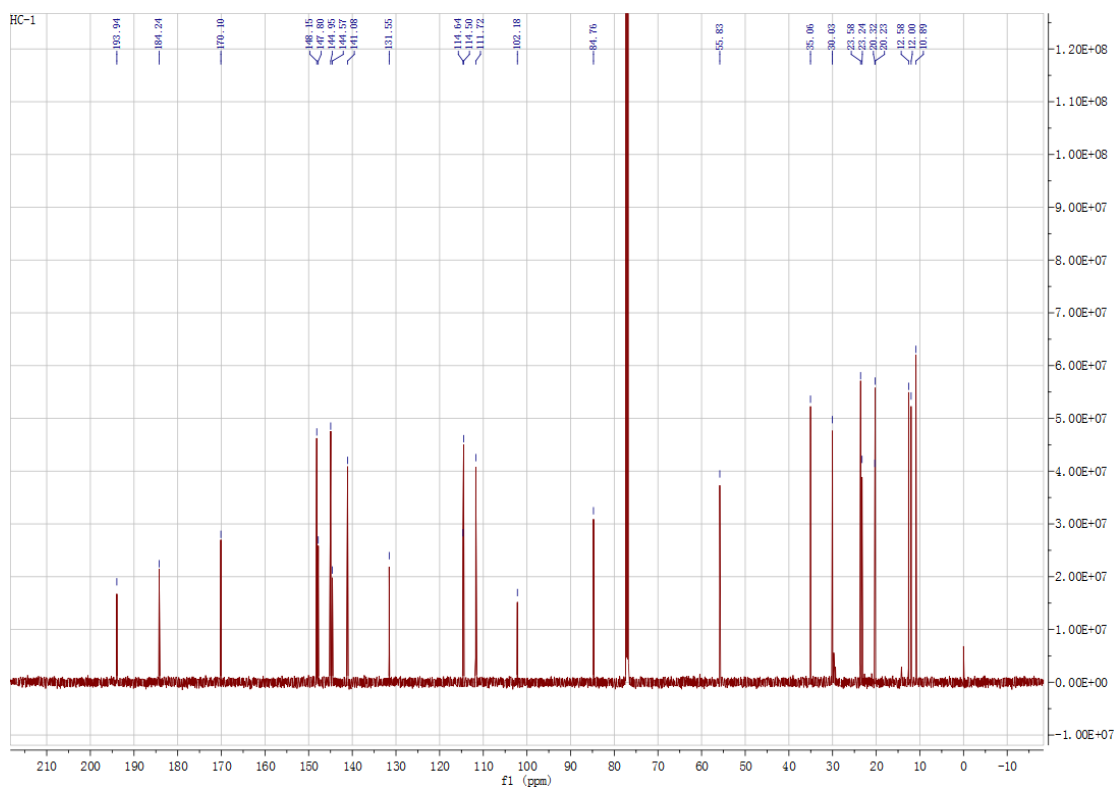

**Fig.S3.**  $^{13}\text{C}$  NMR (150 MHz,  $\text{CDCl}_3$ ) spectrum of compound 1

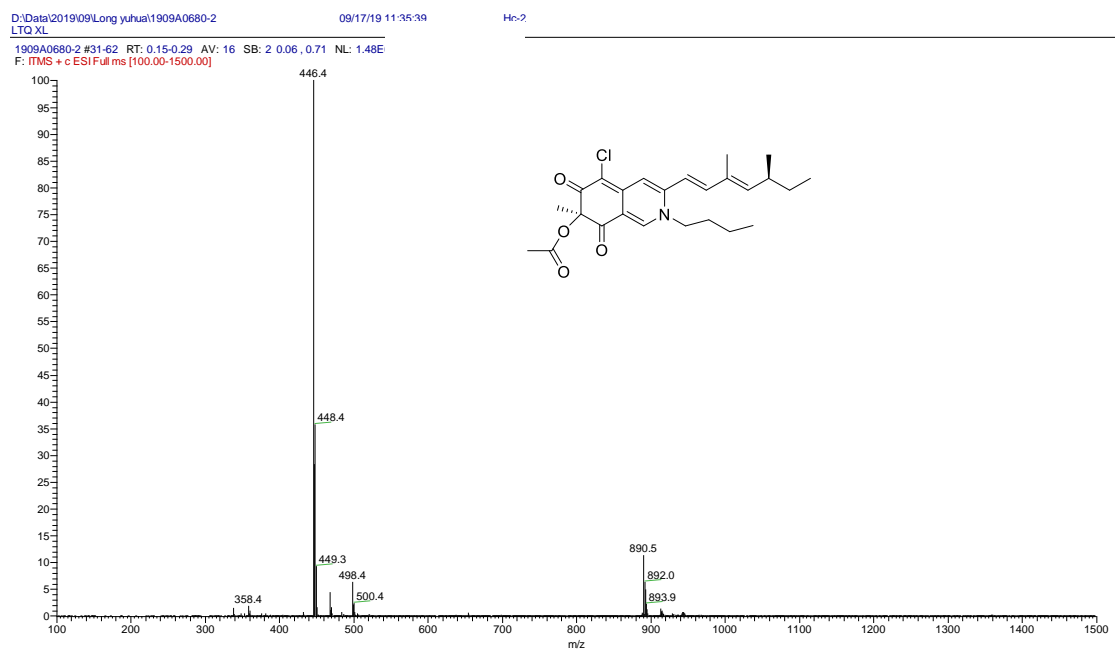

**Fig.S4.** MS spectrum of compound 2

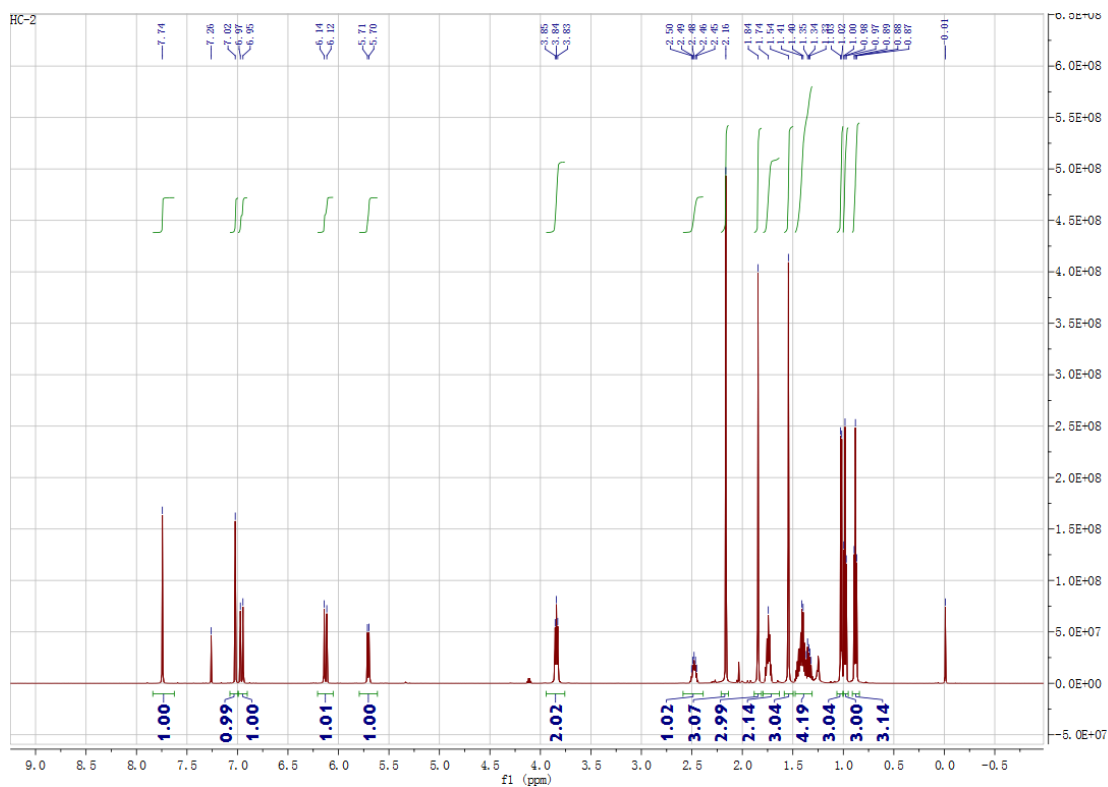

**Fig.S5.**  $^1\text{H}$  NMR (600 MHz,  $\text{CDCl}_3$ ) spectrum of compound **2**

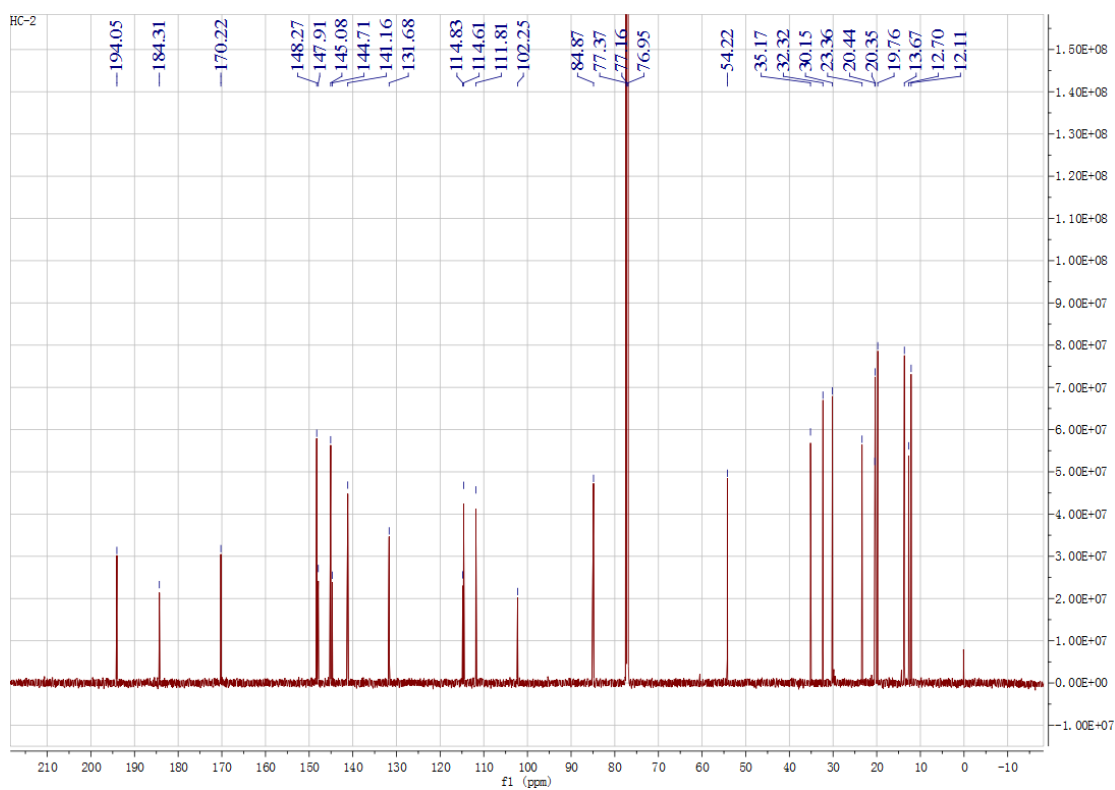

**Fig.S6.**  $^{13}\text{C}$  NMR (150 MHz,  $\text{CDCl}_3$ ) spectrum of compound **2**

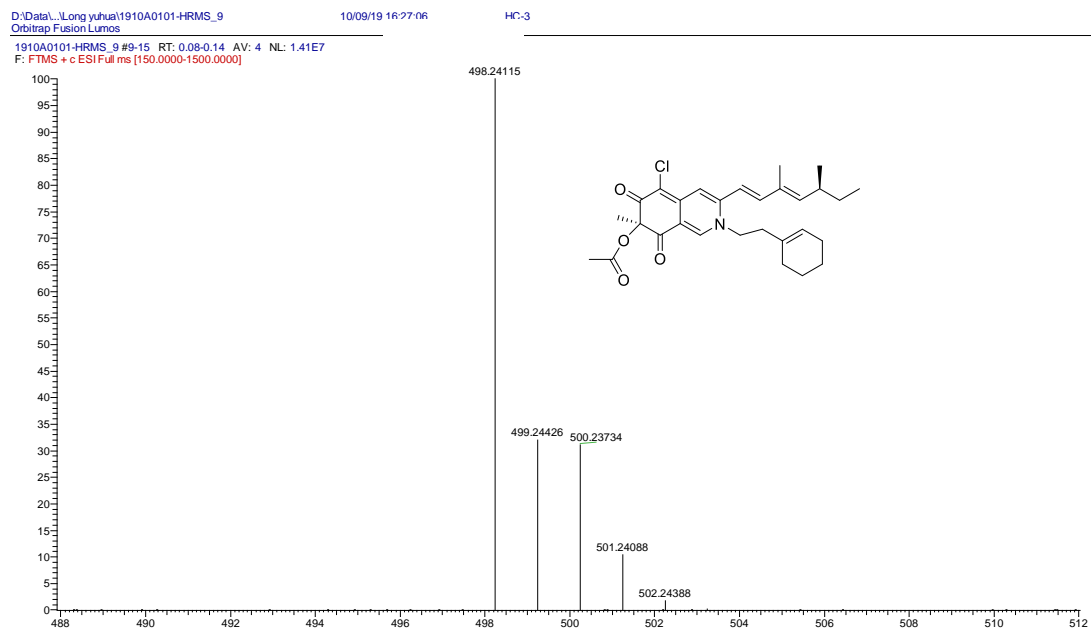

Fig.S7. HRMS spectrum of compound 3

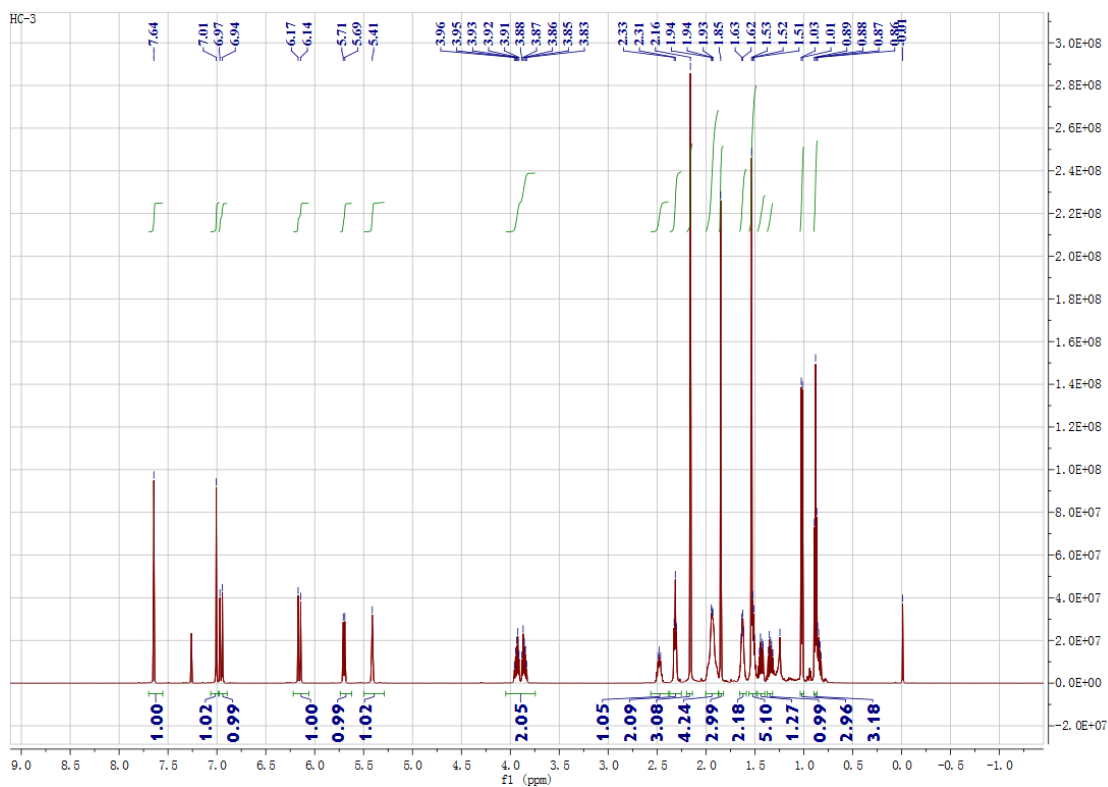

Fig.S8.  $^1\text{H}$  NMR (600 MHz,  $\text{CDCl}_3$ ) spectrum of compound 3



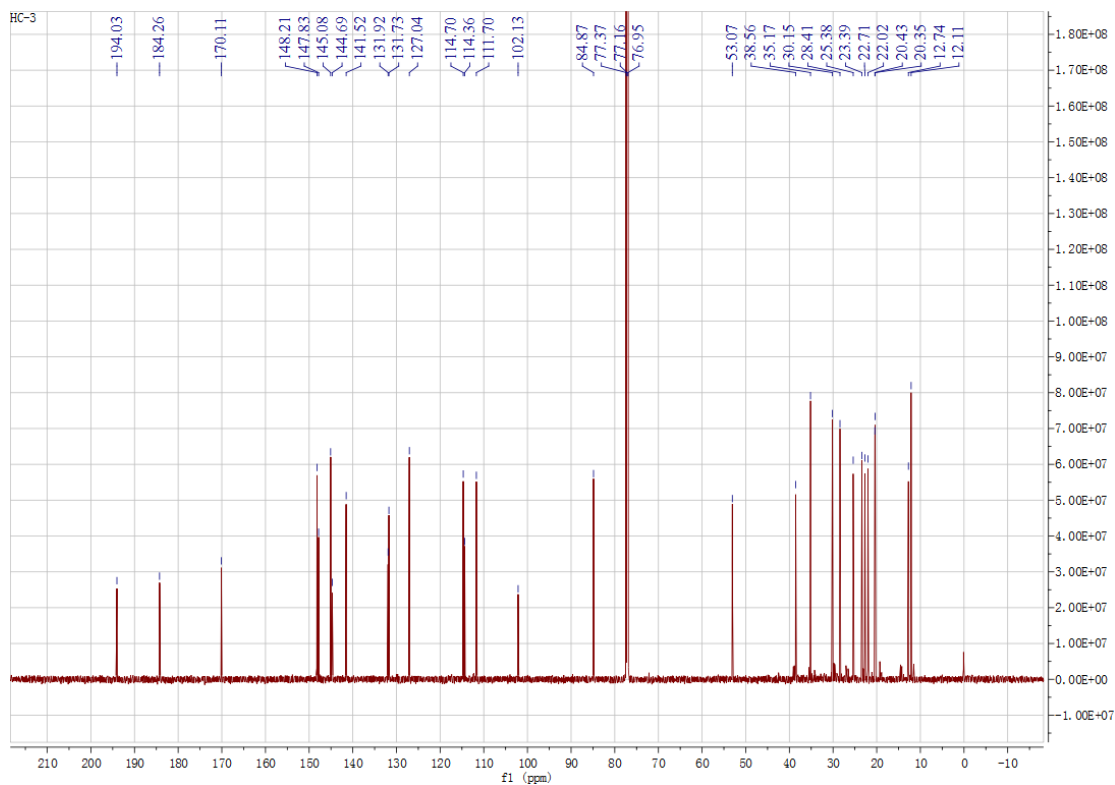

**Fig.S9.** <sup>13</sup>C NMR (150 MHz, CDCl<sub>3</sub>) spectrum of compound 3

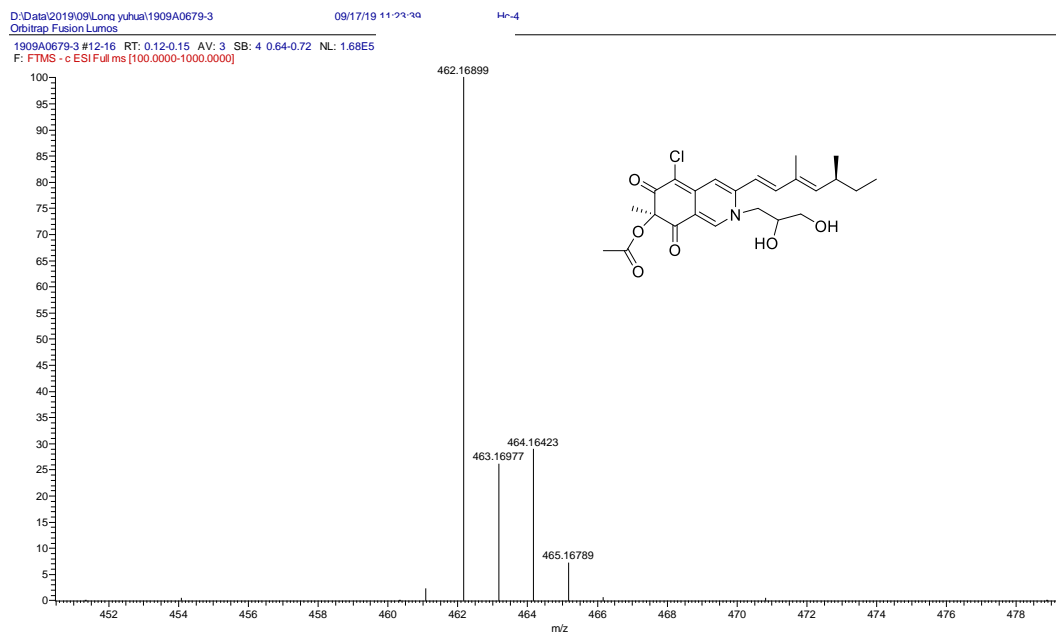

**Fig.S10.** HRMS spectrum of compound 4

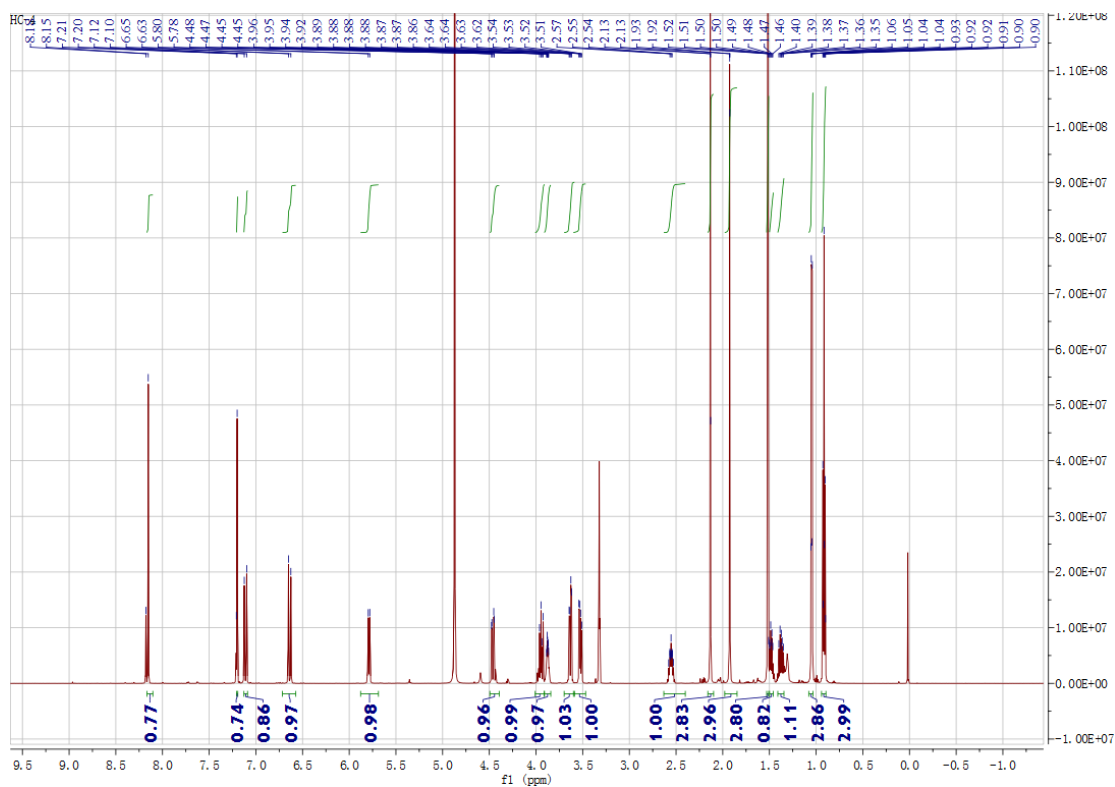

**Fig.S11.**  $^1\text{H}$  NMR (600 MHz,  $\text{CD}_3\text{OD}$ ) spectrum of compound **4**

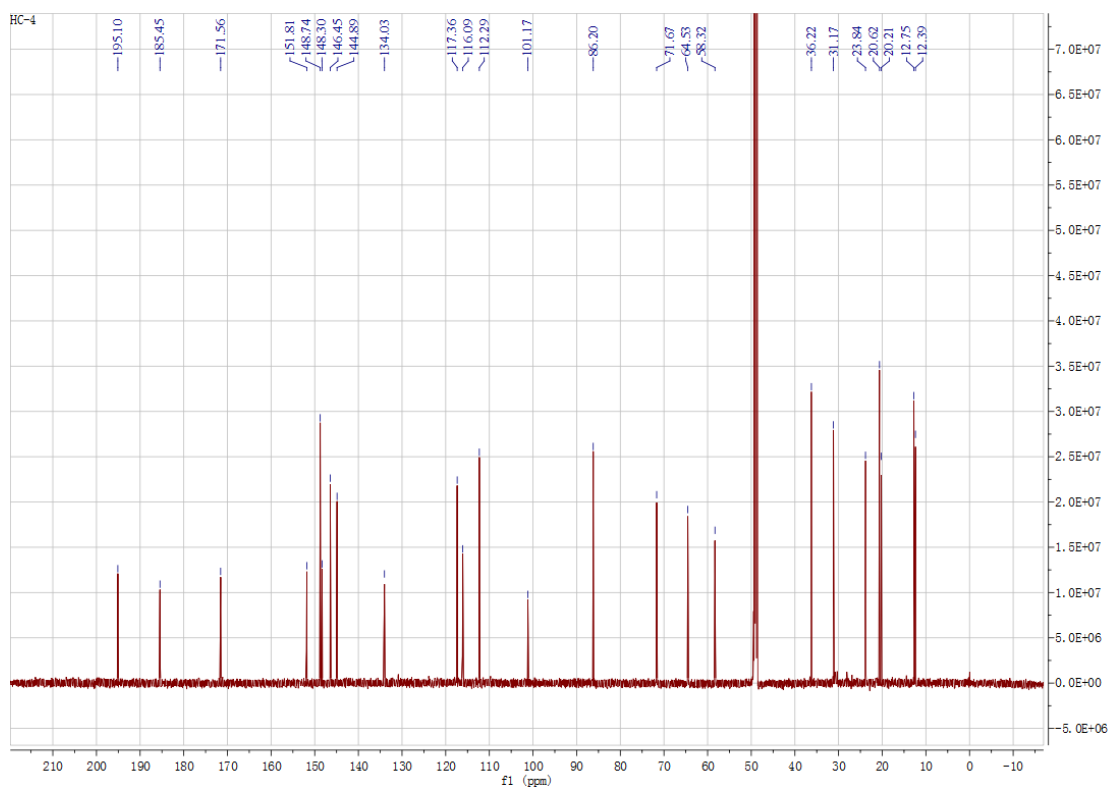

**Fig.S12.**  $^{13}\text{C}$  NMR (150 MHz,  $\text{CD}_3\text{OD}$ ) spectrum of compound **4**

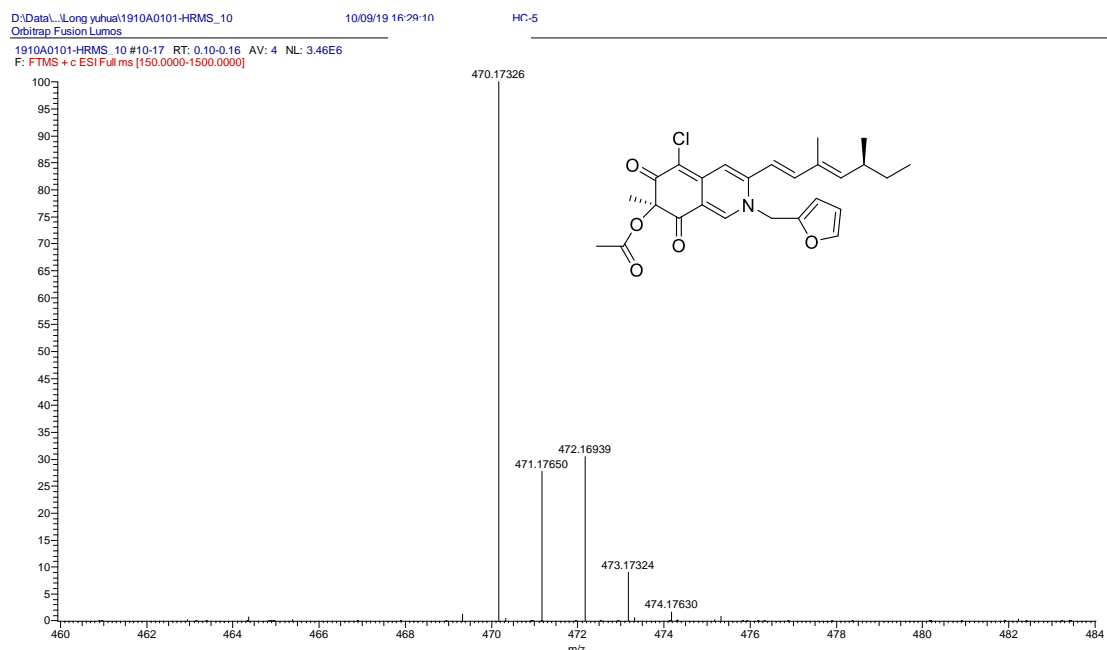

**Fig.S13.** HRMS spectrum of compound **5**

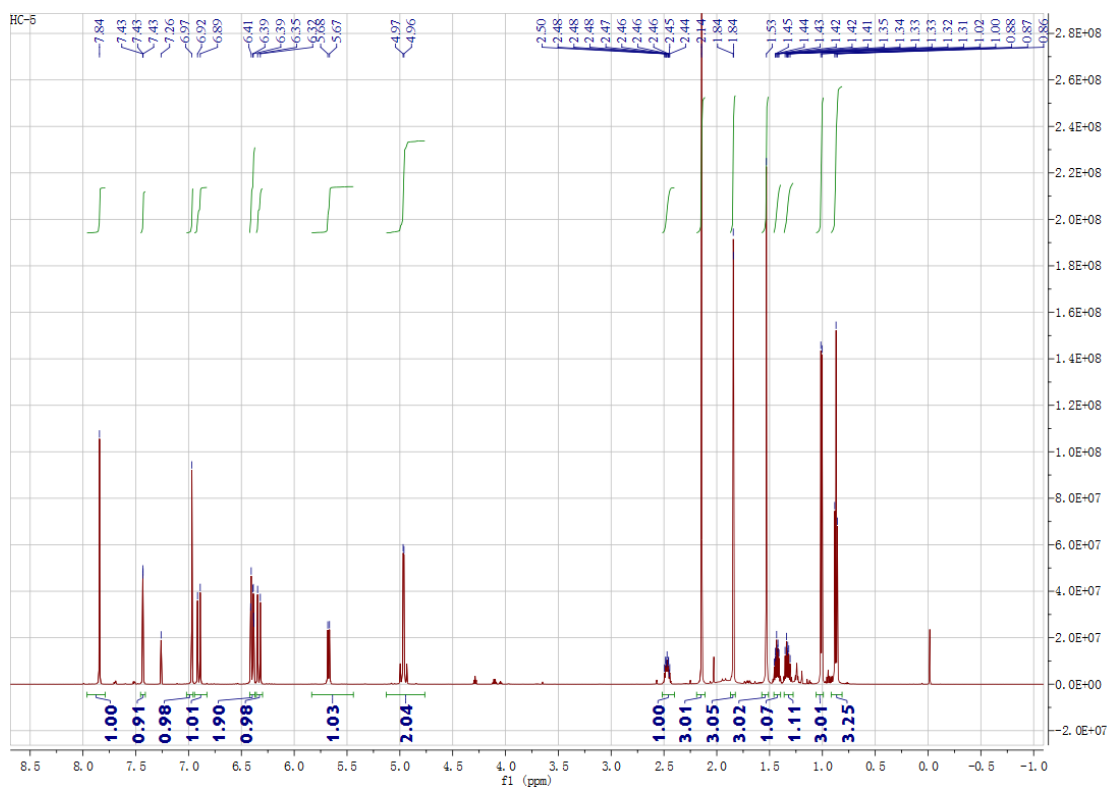

**Fig.S14.**  $^1\text{H}$  NMR (600 MHz,  $\text{CDCl}_3$ ) spectrum of compound **5**

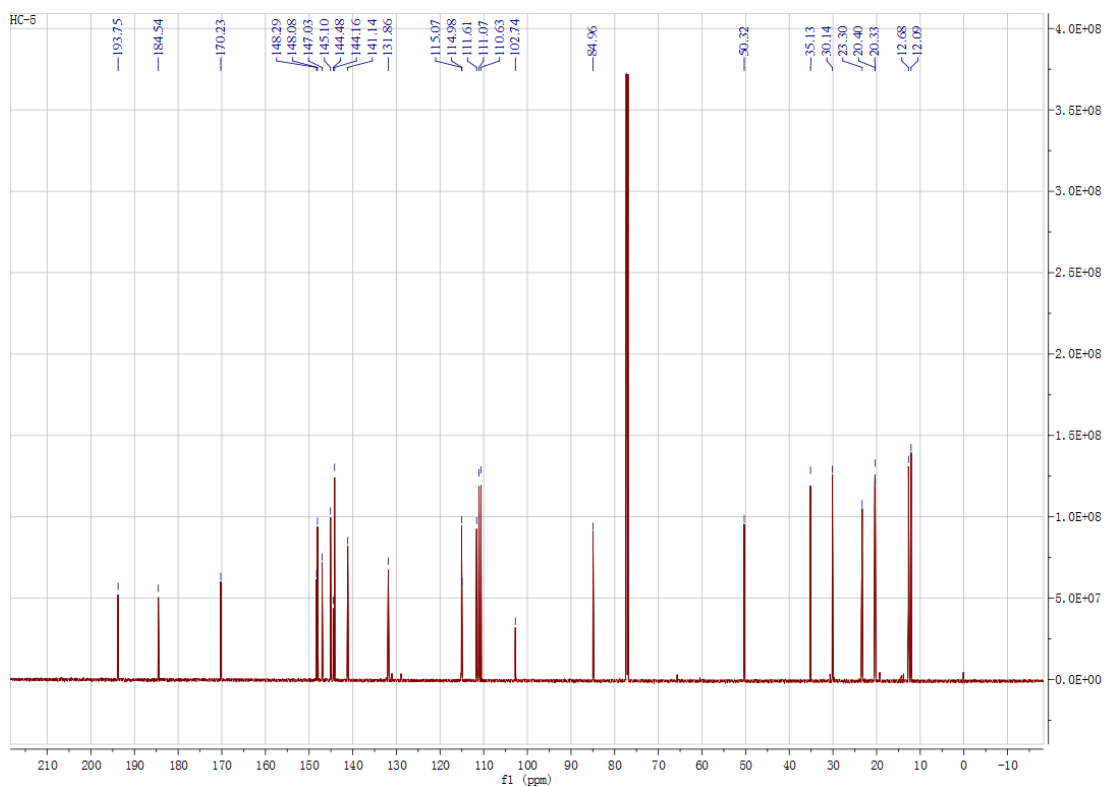

**Fig.S15.**  $^{13}\text{C}$  NMR (150 MHz,  $\text{CDCl}_3$ ) spectrum of compound **5**

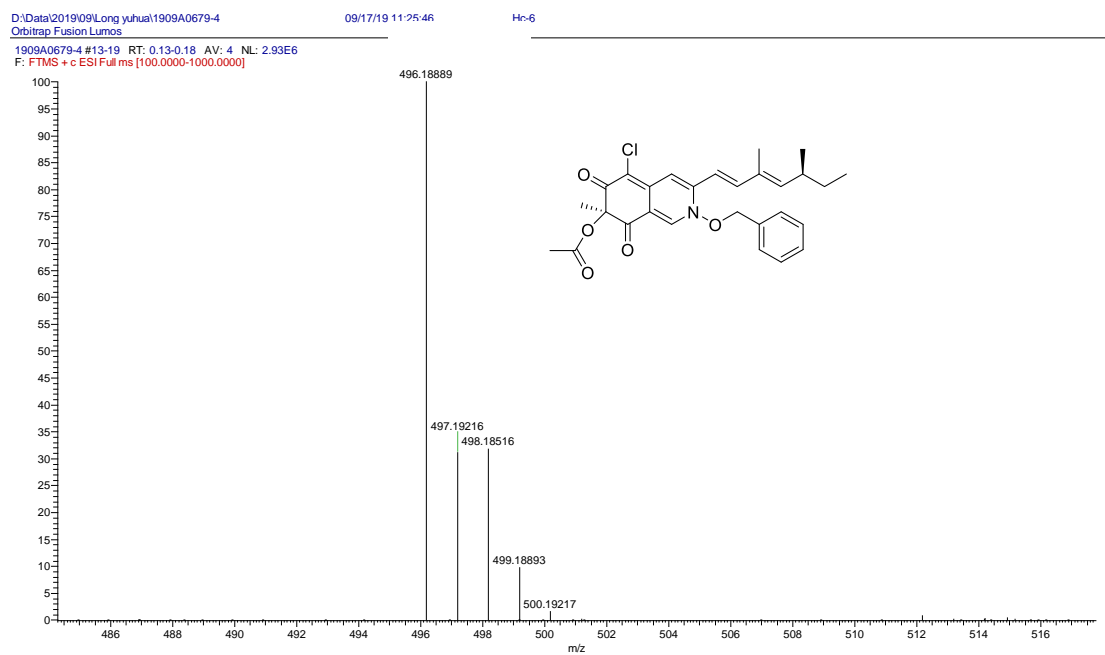

**Fig.S16.** HRMS spectrum of compound **6**

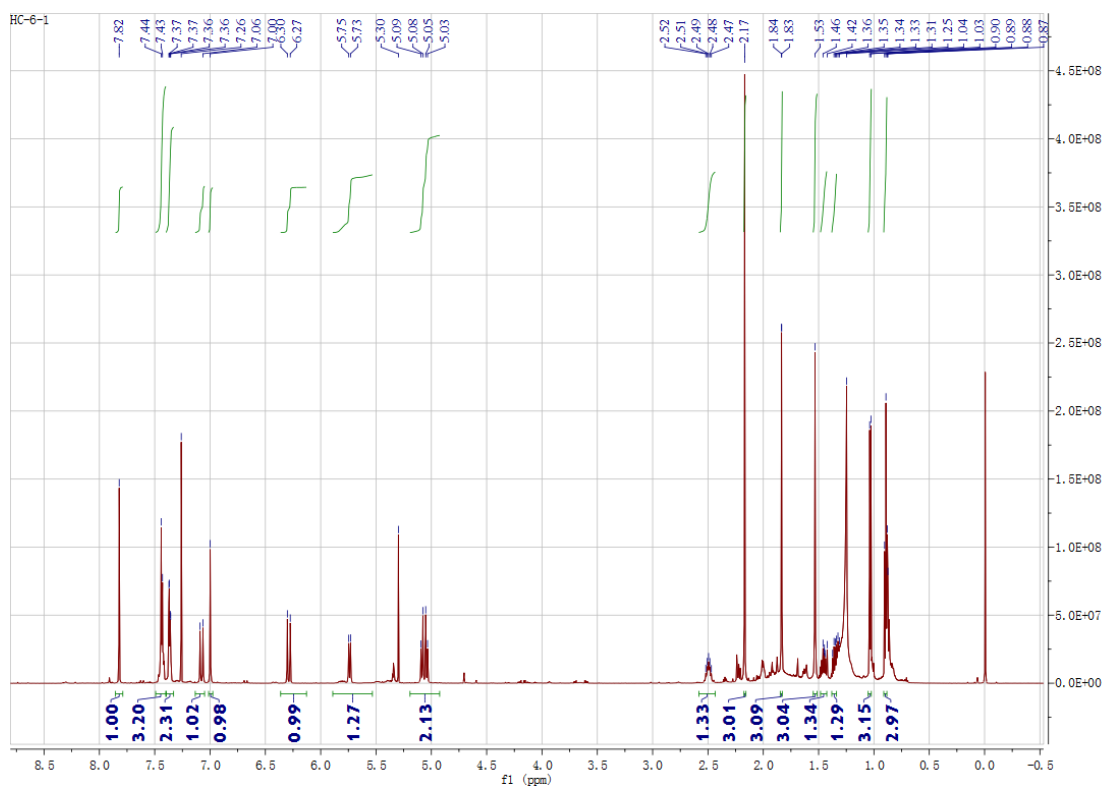

**Fig.S17.**  $^1\text{H}$  NMR (600 MHz,  $\text{CDCl}_3$ ) spectrum of compound **6**

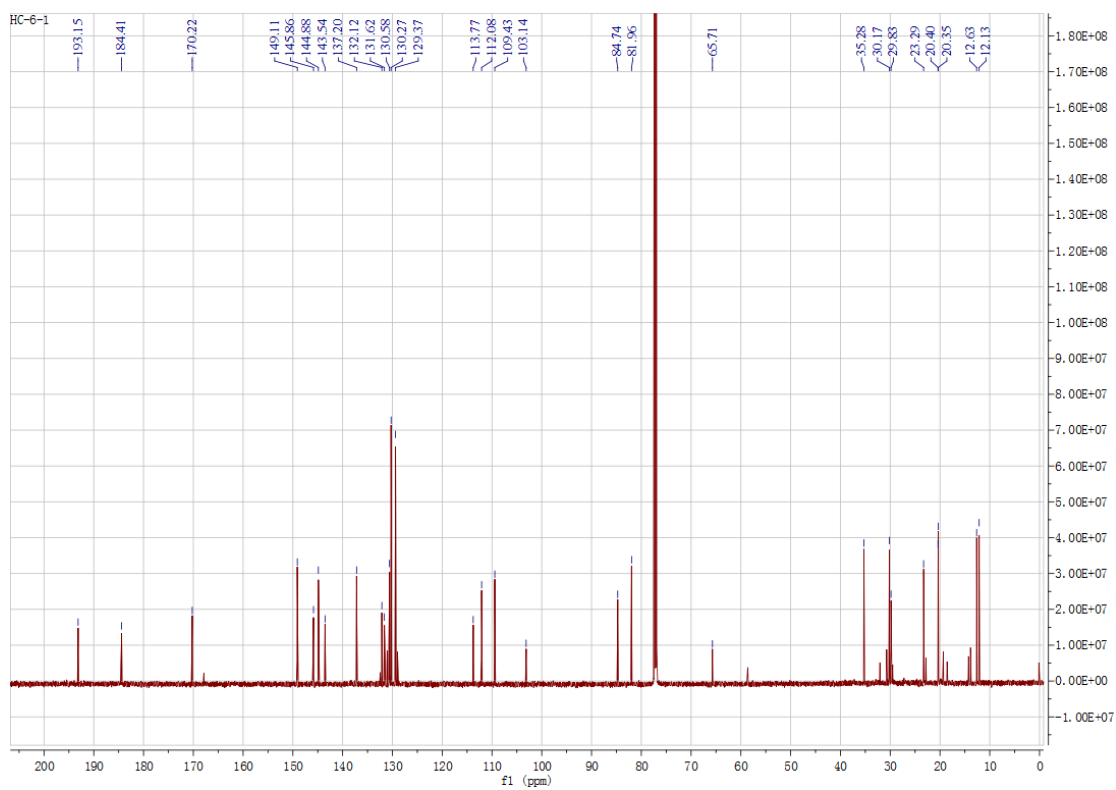

**Fig.S18.**  $^{13}\text{C}$  NMR (150 MHz,  $\text{CDCl}_3$ ) spectrum of compound **6**

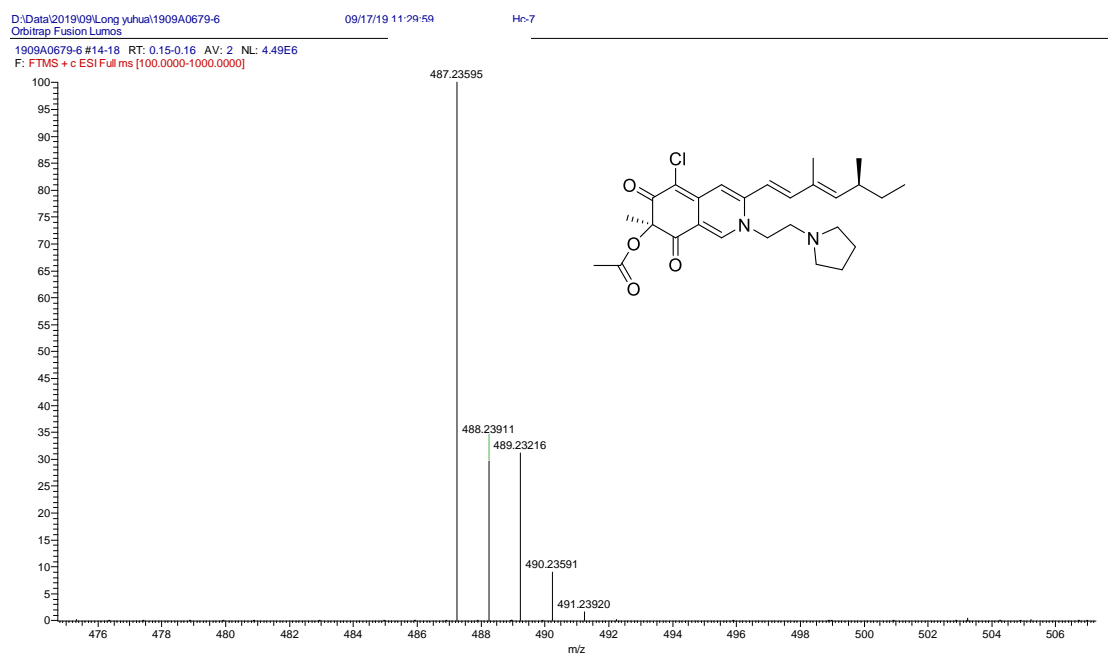

**Fig.S19.** HRMS spectrum of compound **7**

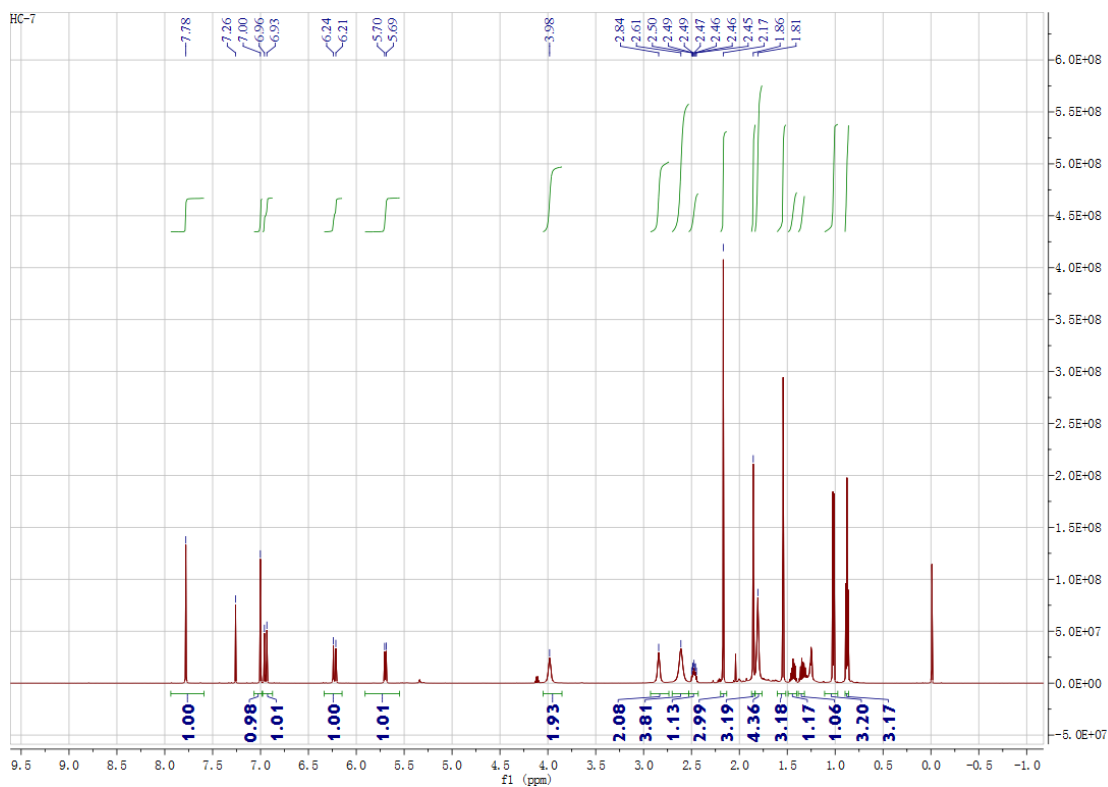

**Fig.S20.** <sup>1</sup>H NMR (600 MHz, CDCl<sub>3</sub>) spectrum of compound **7**

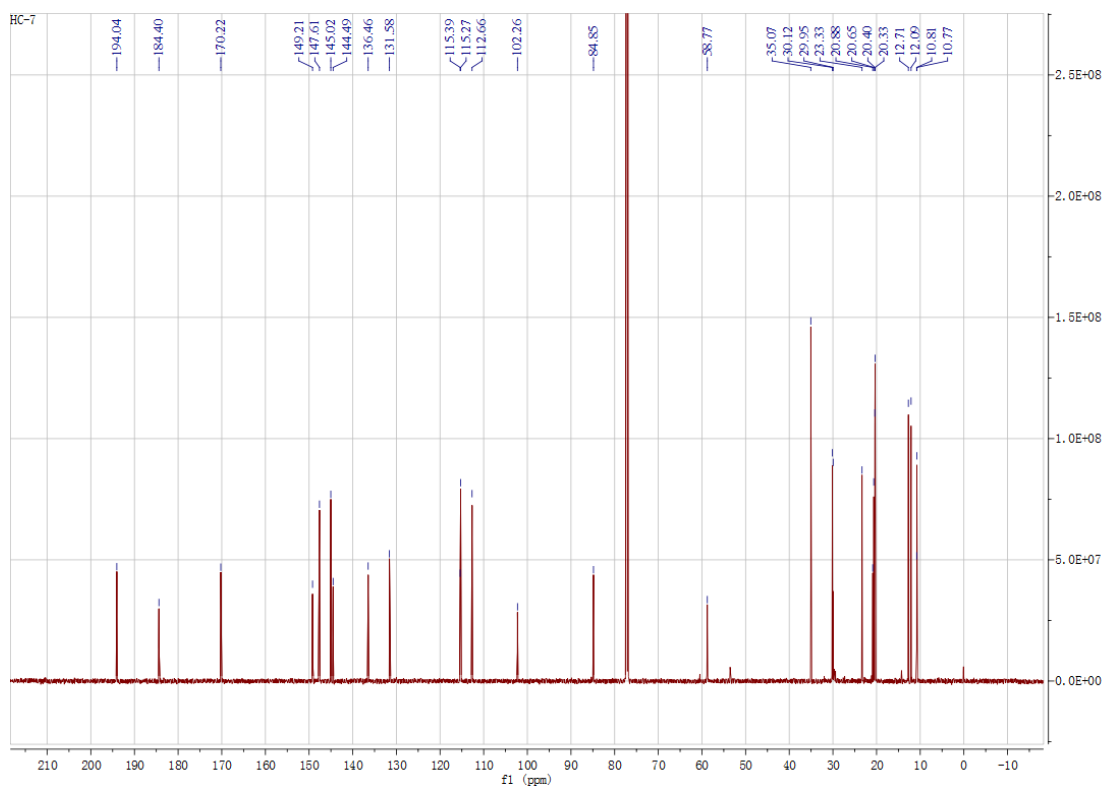

**Fig.S21.**  $^{13}\text{C}$  NMR (150 MHz,  $\text{CDCl}_3$ ) spectrum of compound **7**

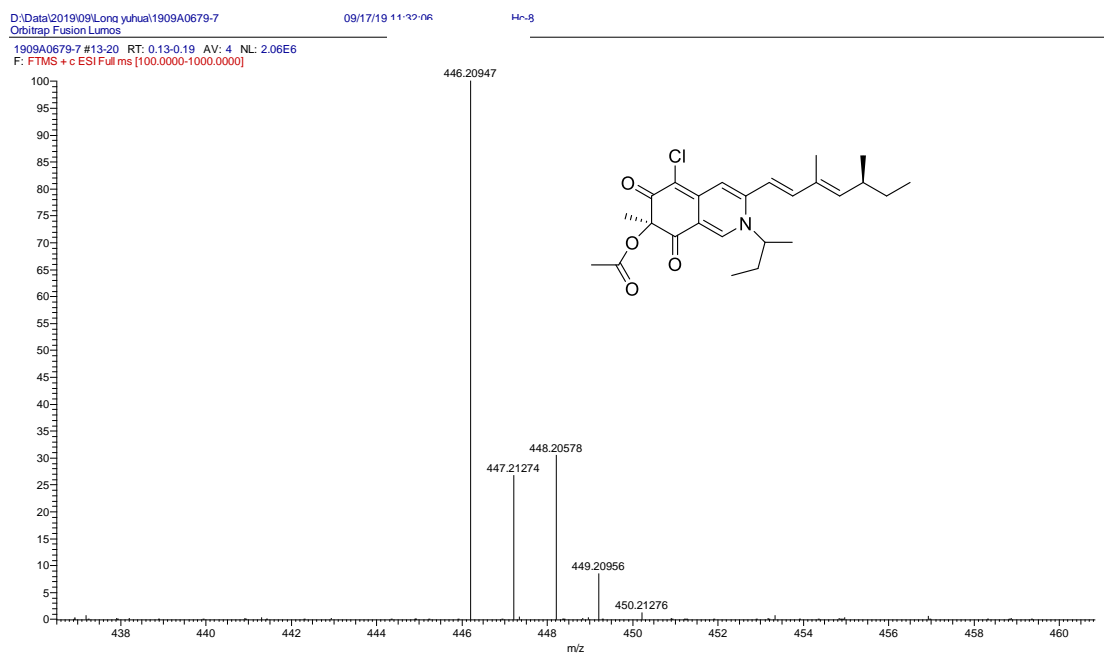

**Fig.S22.** HRMS spectrum of compound **8**

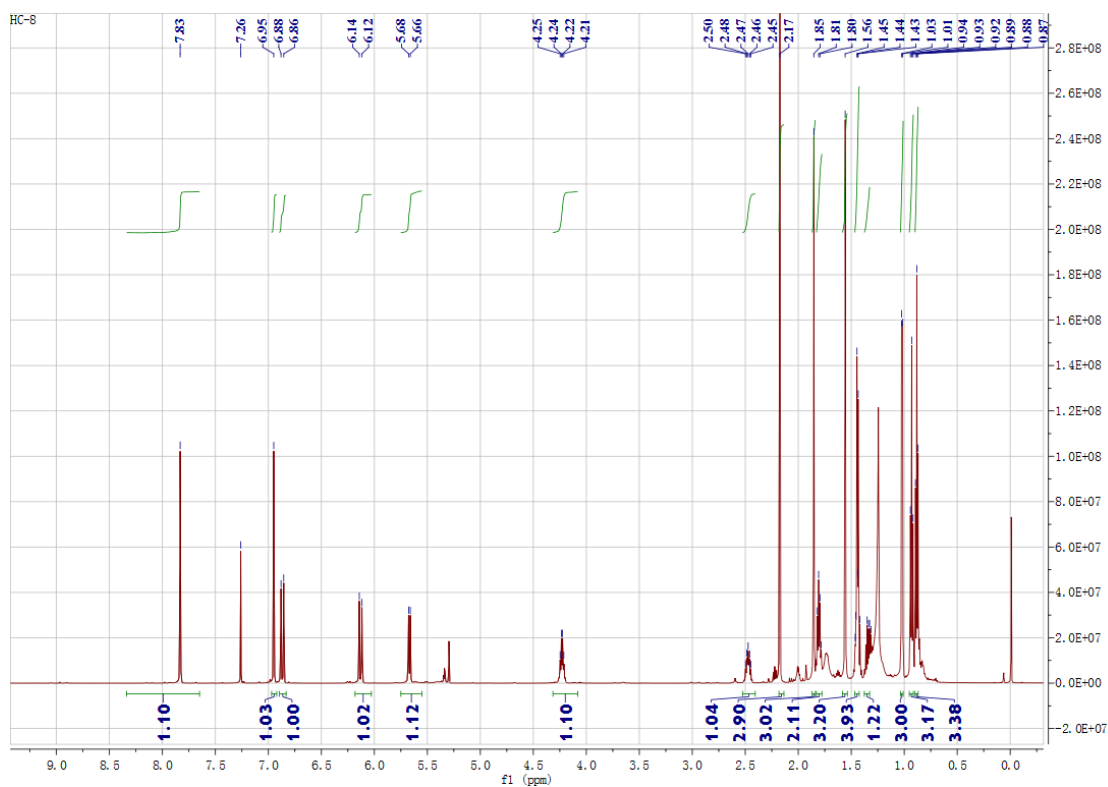

Fig.S23.  $^1\text{H}$  NMR (600 MHz,  $\text{CDCl}_3$ ) spectrum of compound **8**

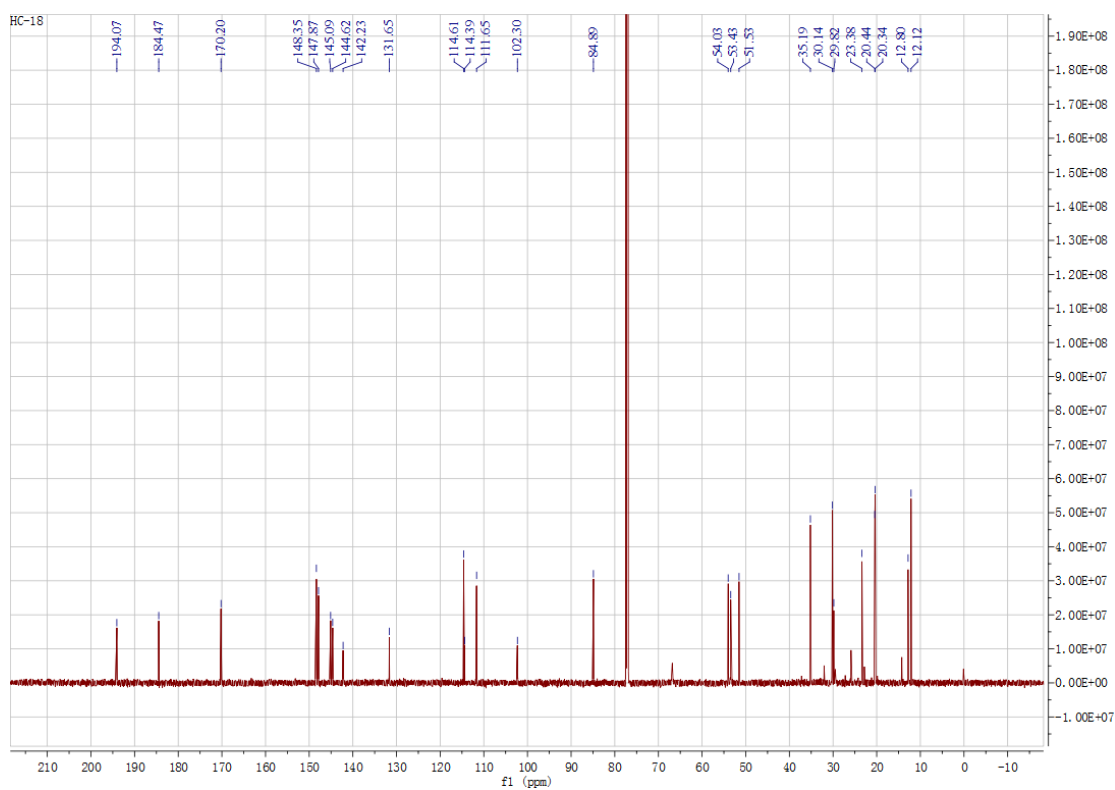

Fig.S24.  $^{13}\text{C}$  NMR (150 MHz,  $\text{CDCl}_3$ ) spectrum of compound **8**



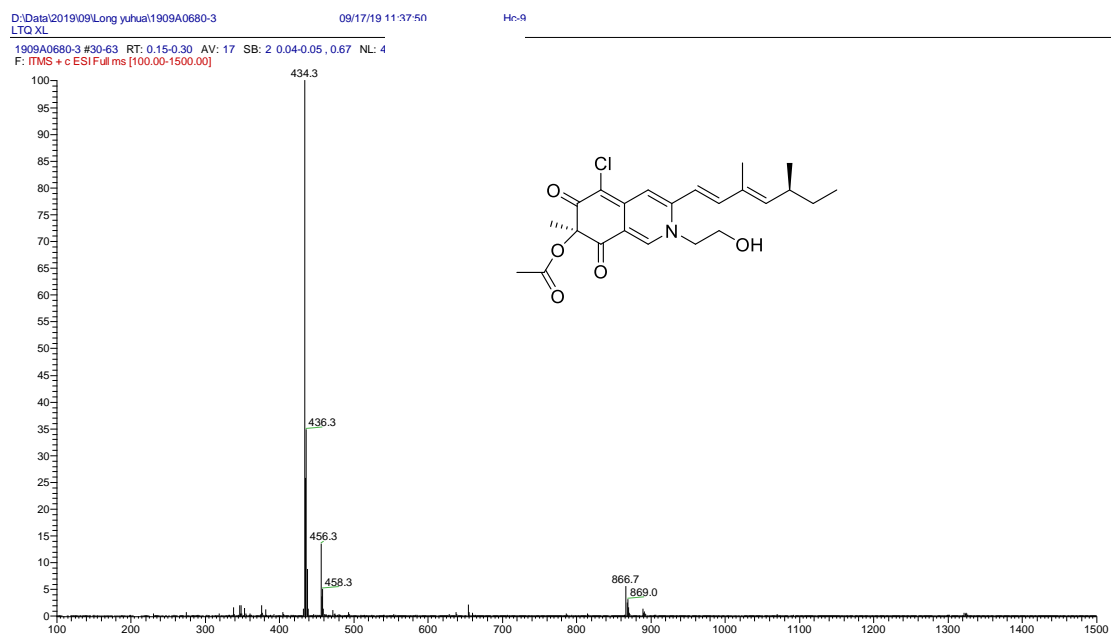

Fig.S25. MS spectrum of compound 9

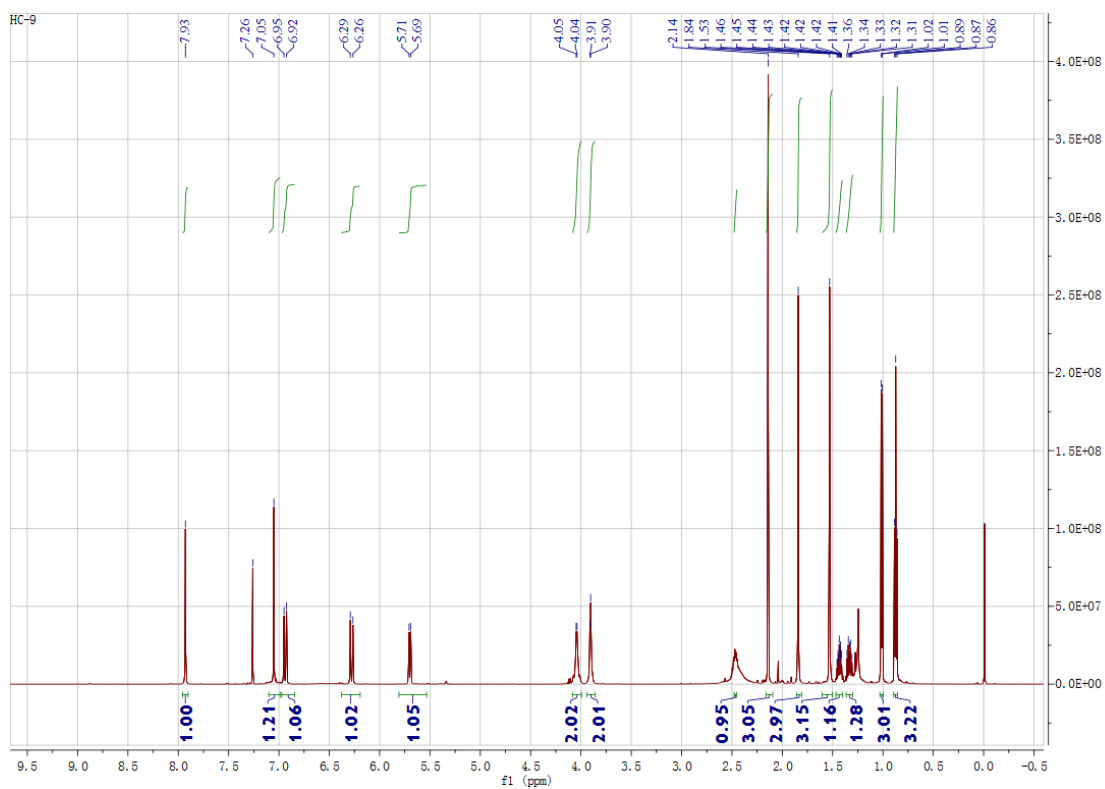

Fig.S26. <sup>1</sup>H NMR (600 MHz, CDCl<sub>3</sub>) spectrum of compound 9

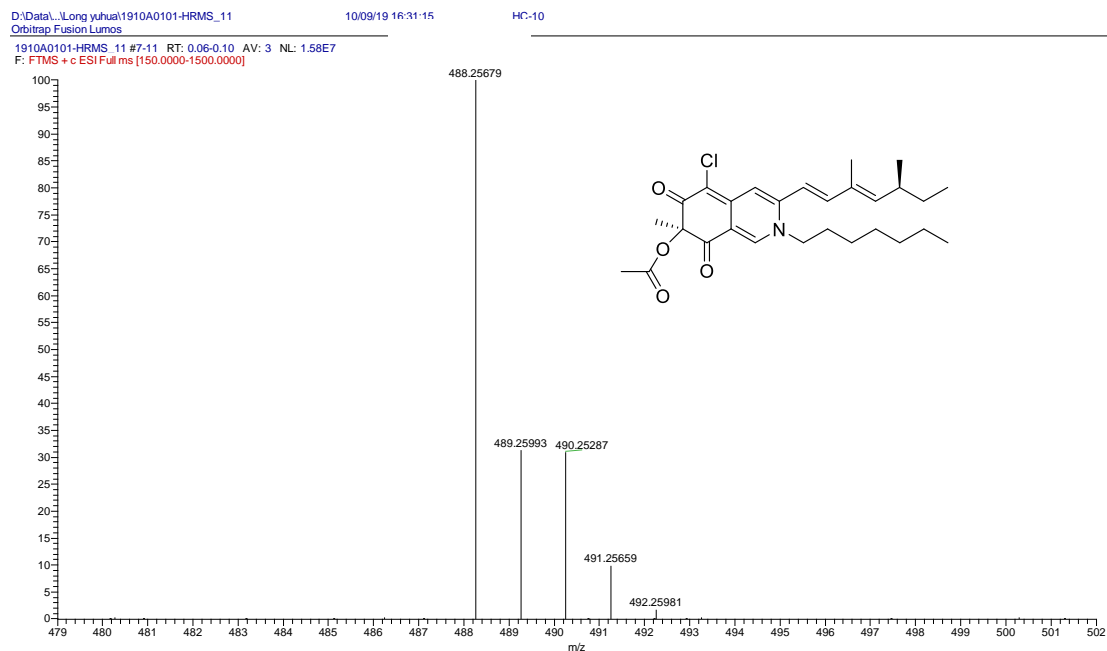

**Fig.S27.** HRMS spectrum of compound **10**

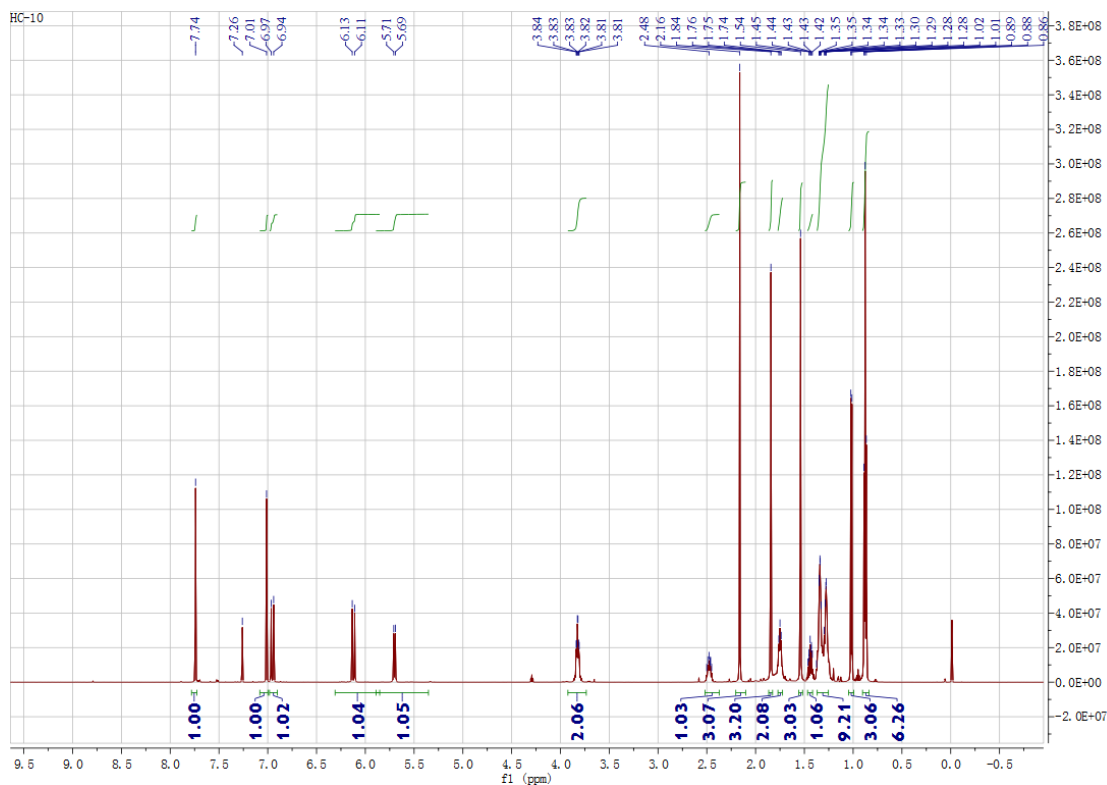

**Fig.S28.** <sup>1</sup>H NMR (600 MHz, CDCl<sub>3</sub>) spectrum of compound **10**

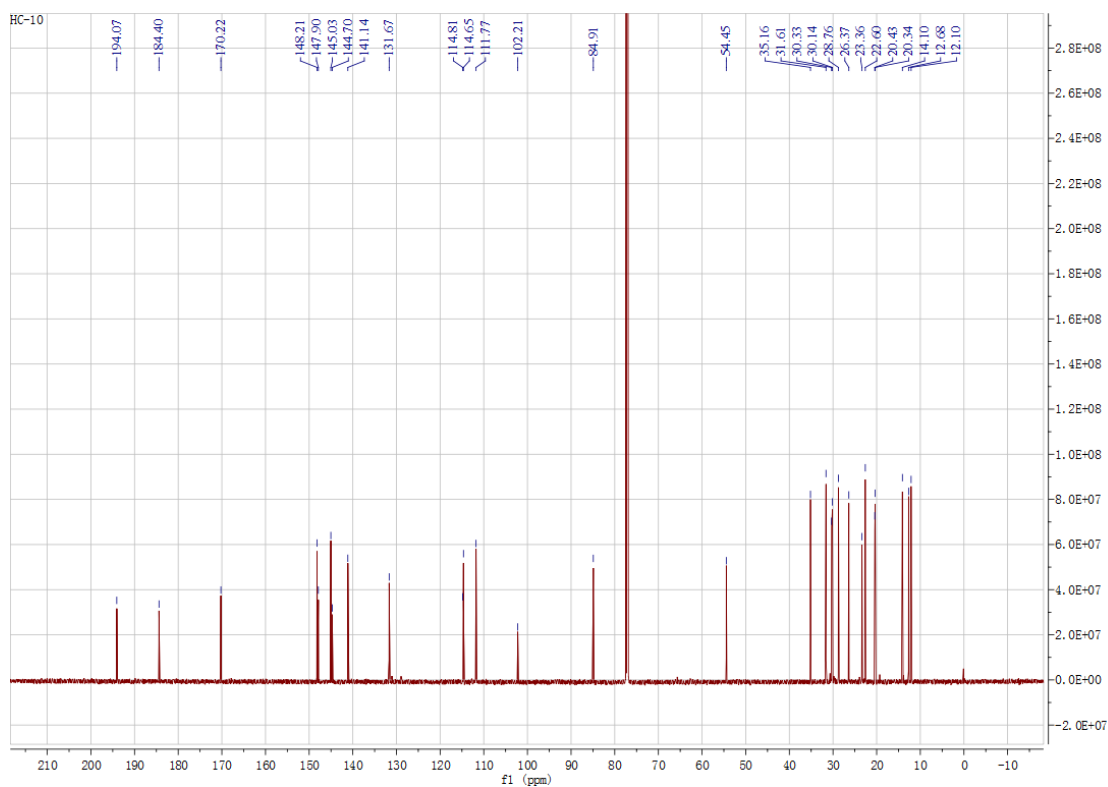

**Fig.S29.**  $^{13}\text{C}$  NMR (150 MHz,  $\text{CDCl}_3$ ) spectrum of compound **10**

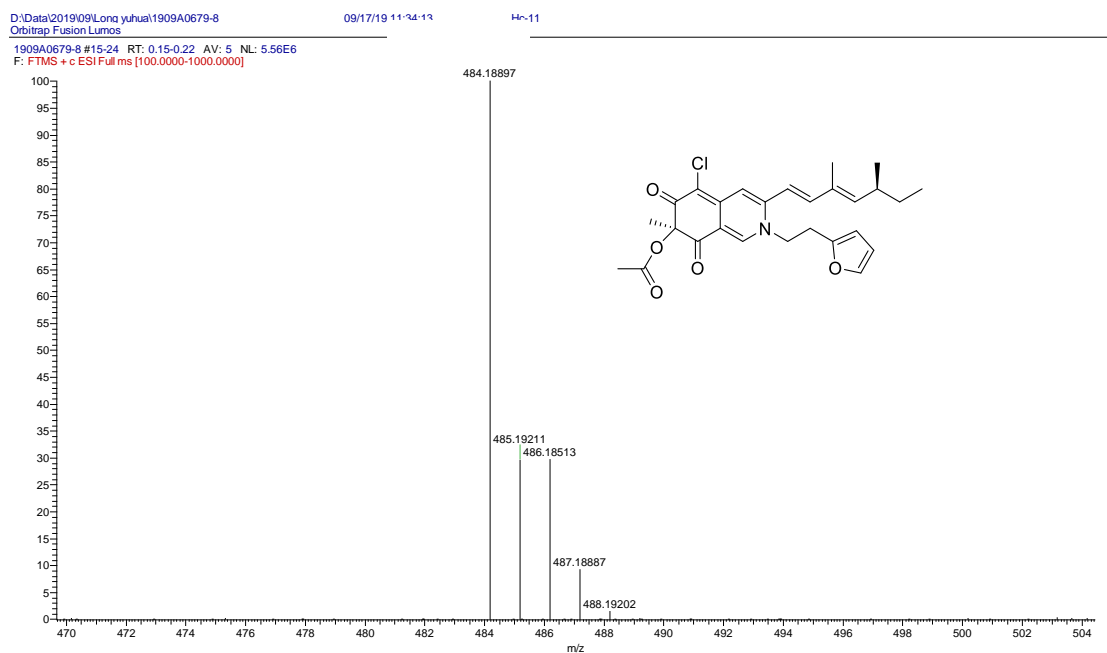

**Fig.S30.** HRMS spectrum of compound **11**

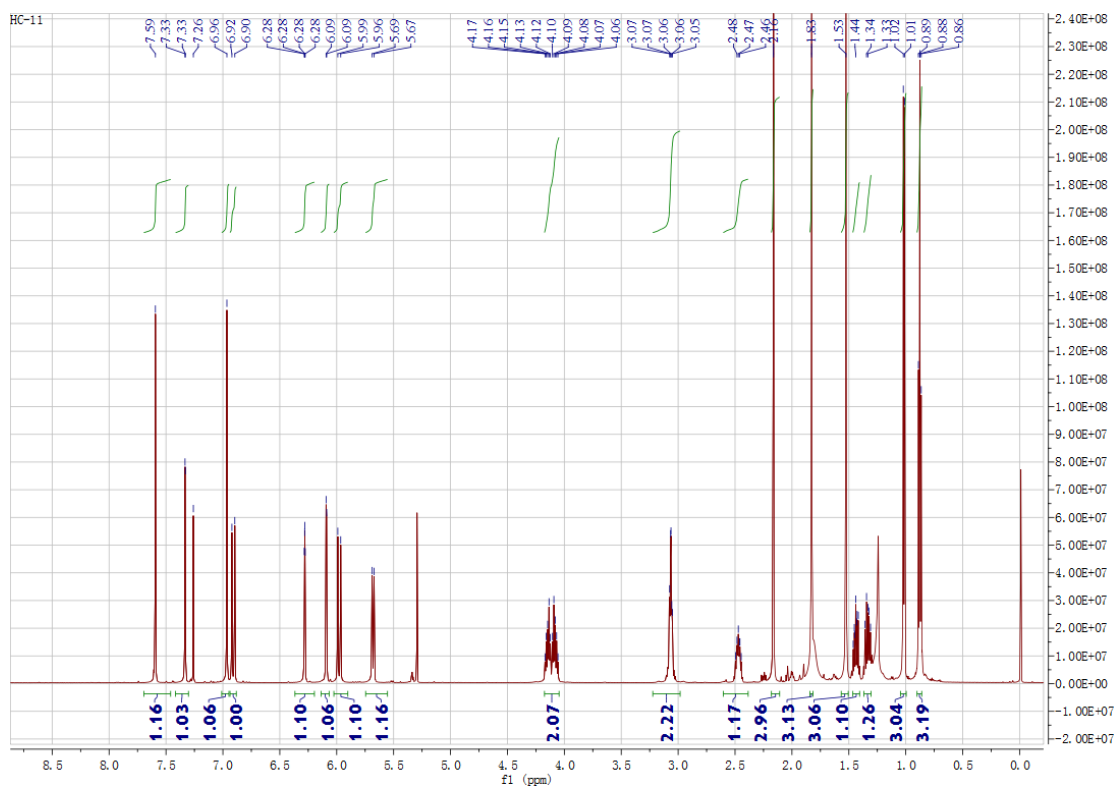

Fig.S31.  $^1\text{H}$  NMR (600 MHz,  $\text{CDCl}_3$ ) spectrum of compound 11

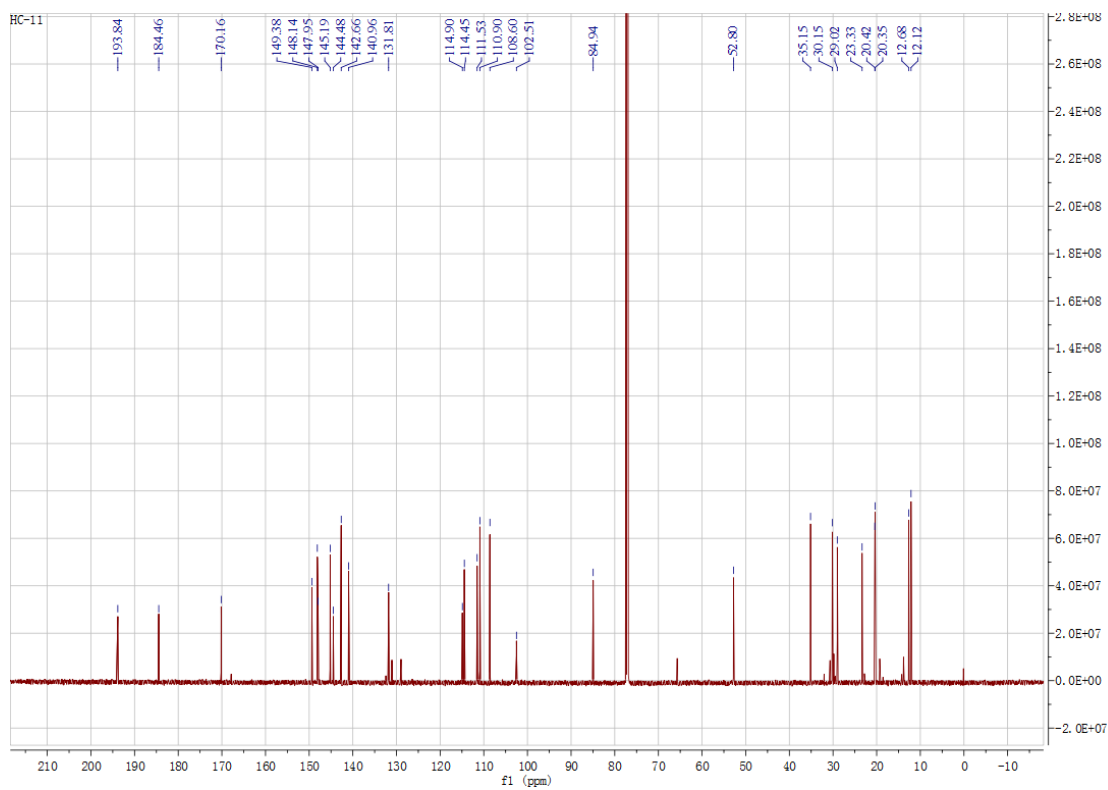

Fig.S32.  $^{13}\text{C}$  NMR (150 MHz,  $\text{CDCl}_3$ ) spectrum of compound 11

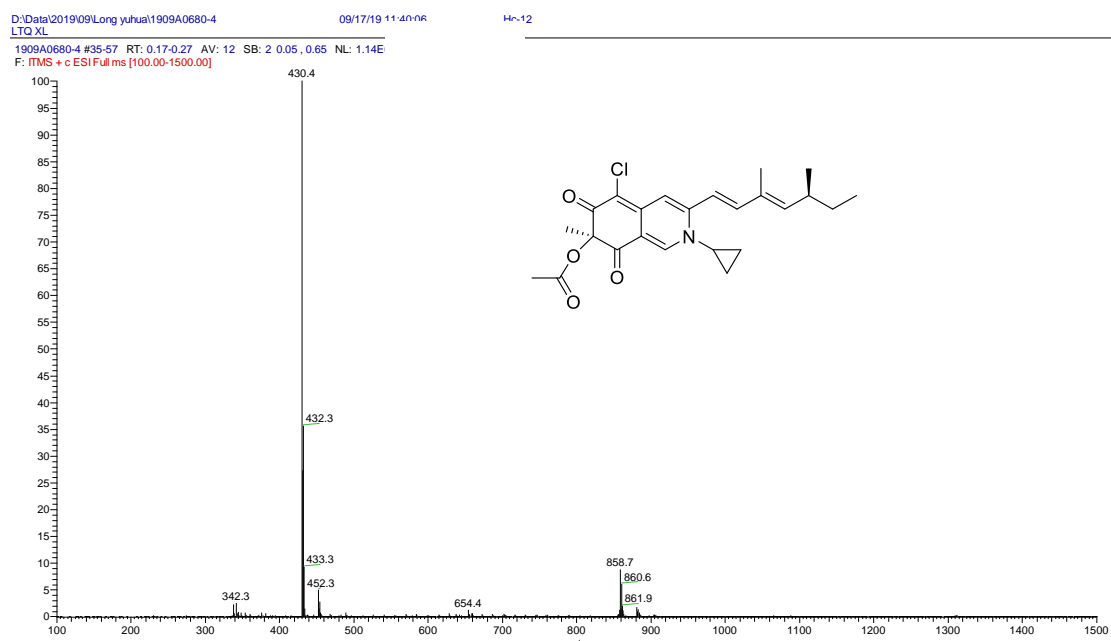

Fig.S33. MS spectrum of compound 12

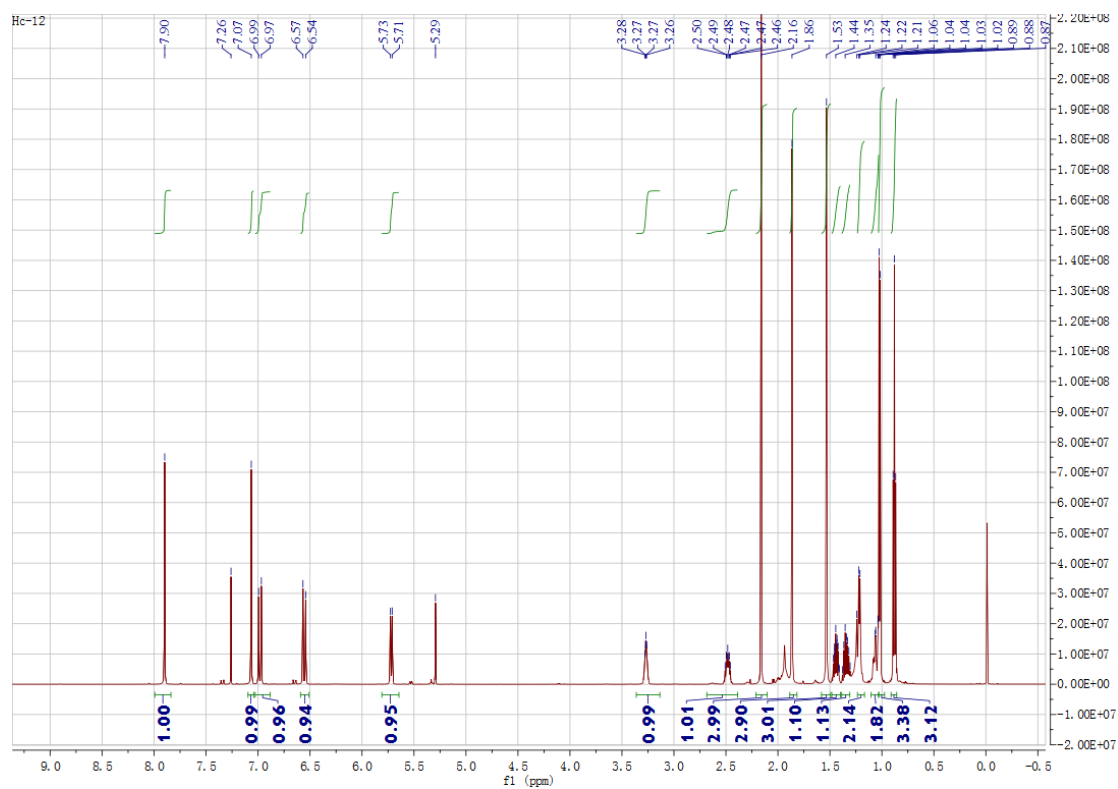

Fig.S34.  $^1\text{H}$  NMR (600 MHz,  $\text{CDCl}_3$ ) spectrum of compound 12

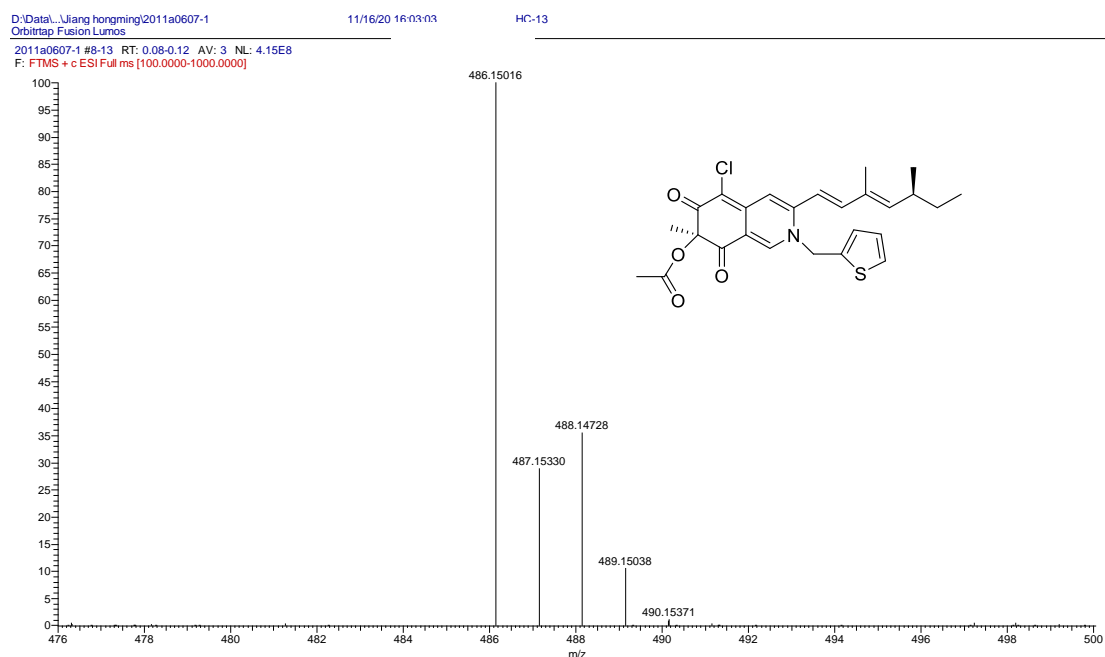

Fig.S35. HRMS spectrum of compound 13

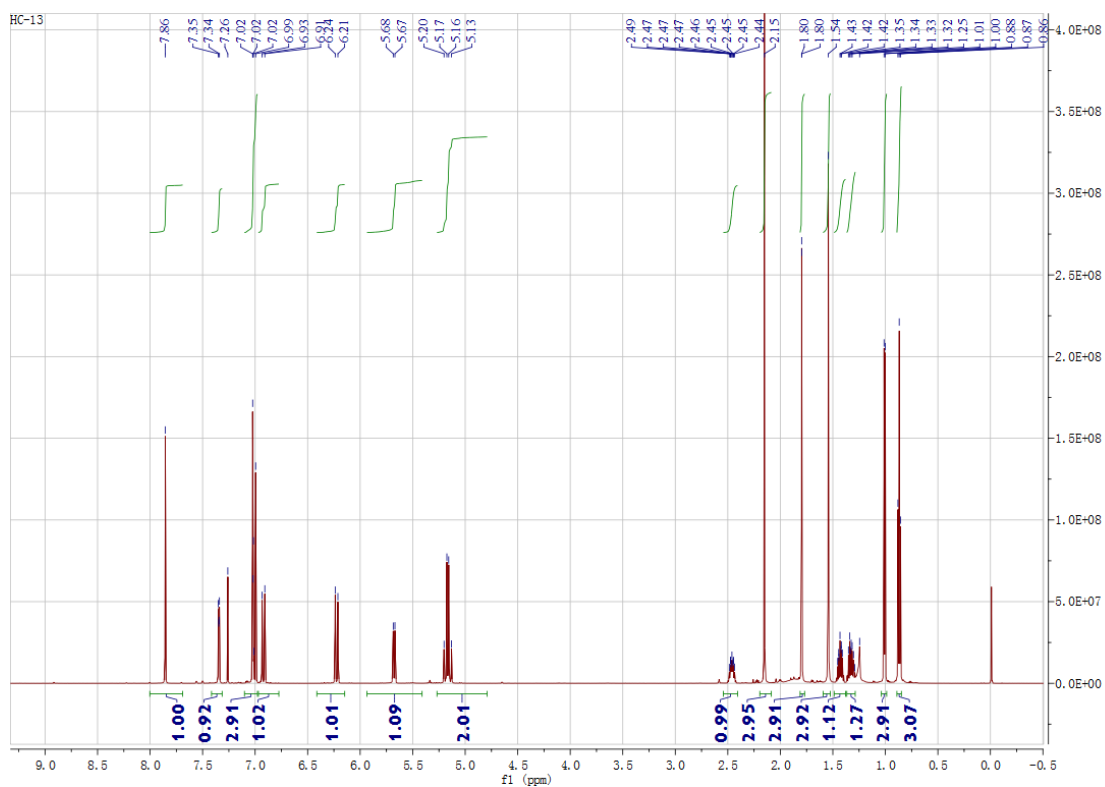

Fig.S36. <sup>1</sup>H NMR (600 MHz, CDCl<sub>3</sub>) spectrum of compound 13

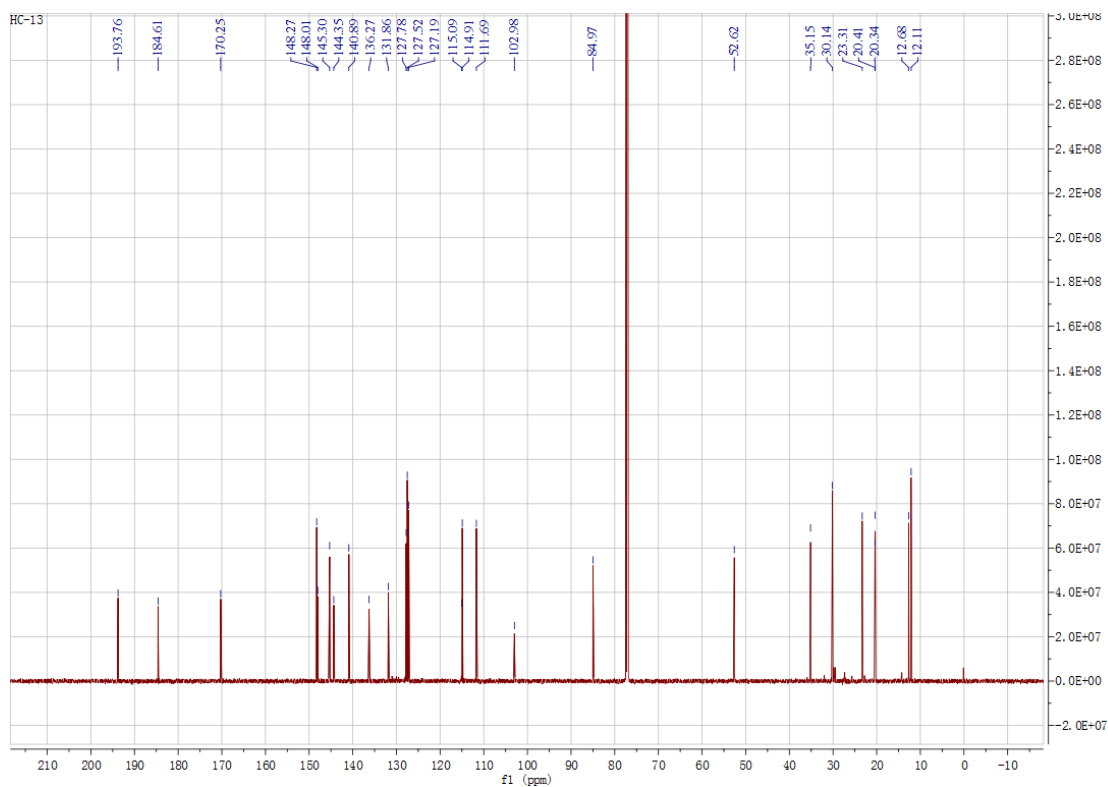

**Fig.S37. <sup>13</sup>C NMR (150 MHz, CDCl<sub>3</sub>) spectrum of compound 13**

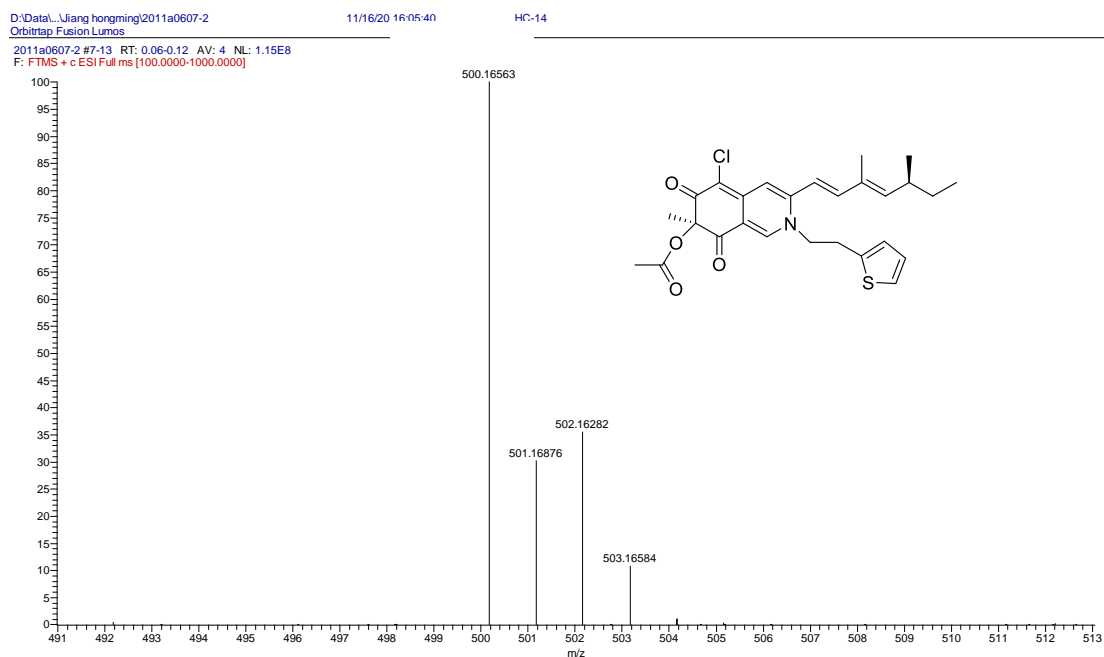

**Fig.S38. HRMS spectrum of compound 14**

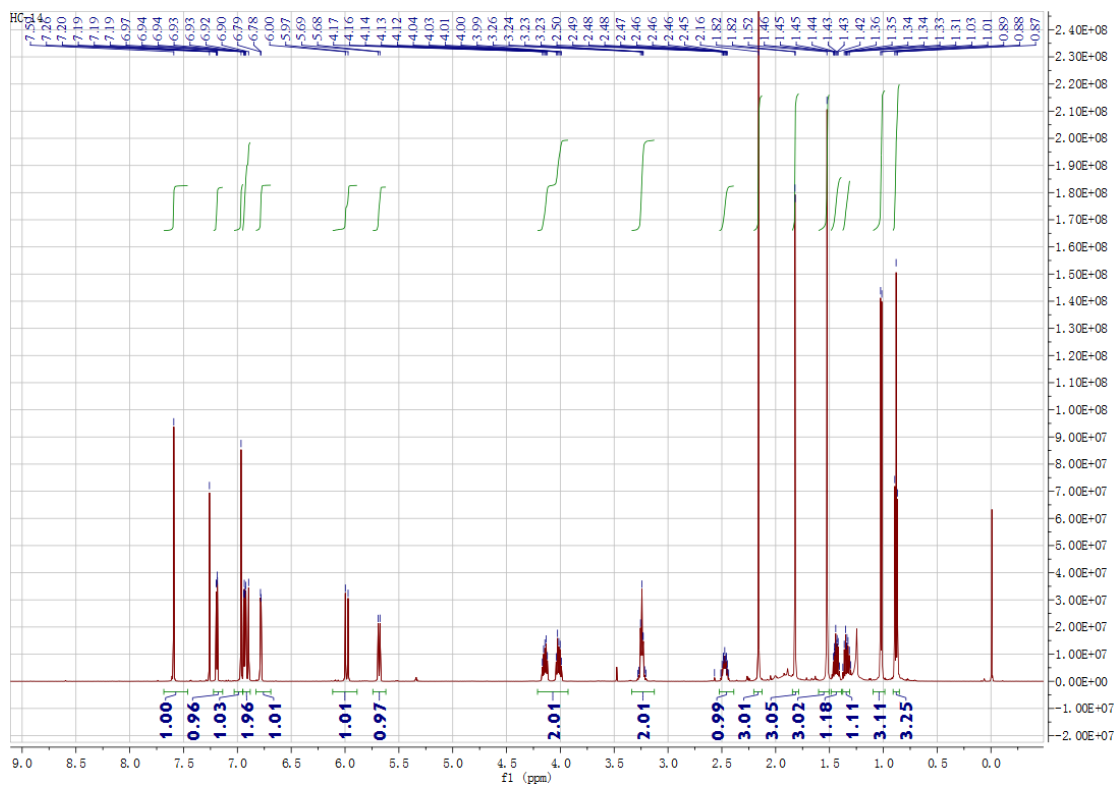

**Fig.S39.**  $^1\text{H}$  NMR (600 MHz,  $\text{CDCl}_3$ ) spectrum of compound **14**

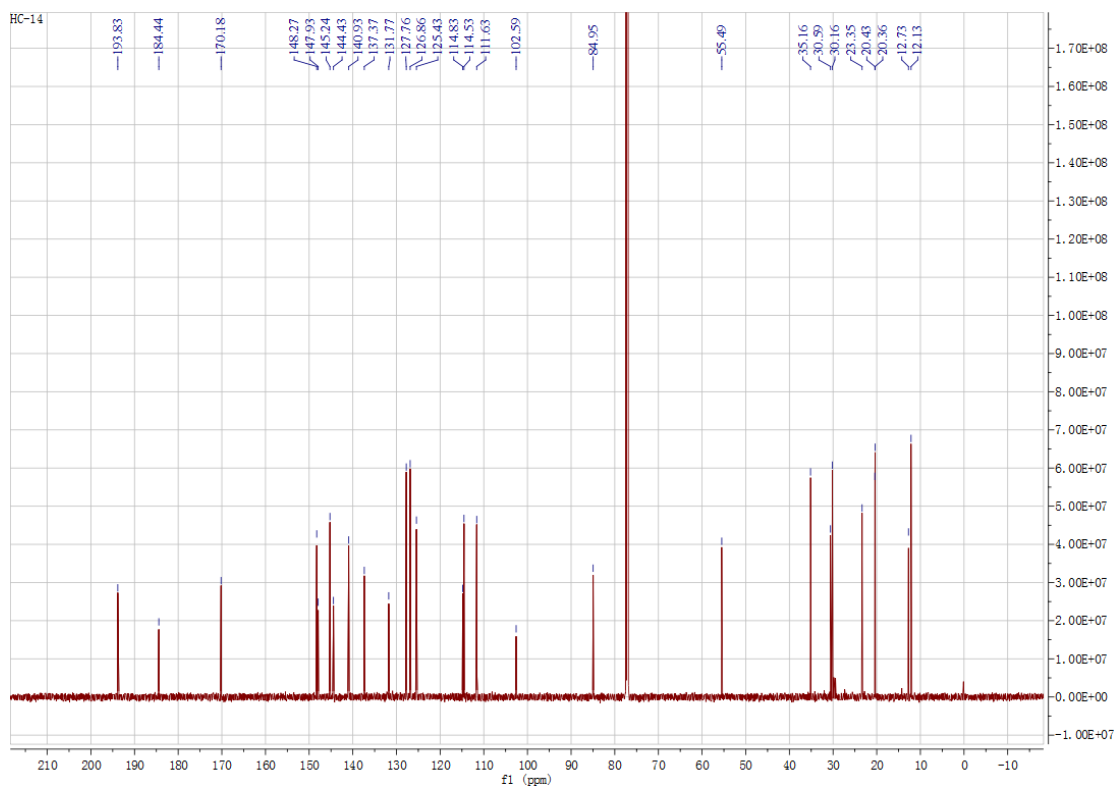

**Fig.S40.**  $^{13}\text{C}$  NMR (150 MHz,  $\text{CDCl}_3$ ) spectrum of compound **14**



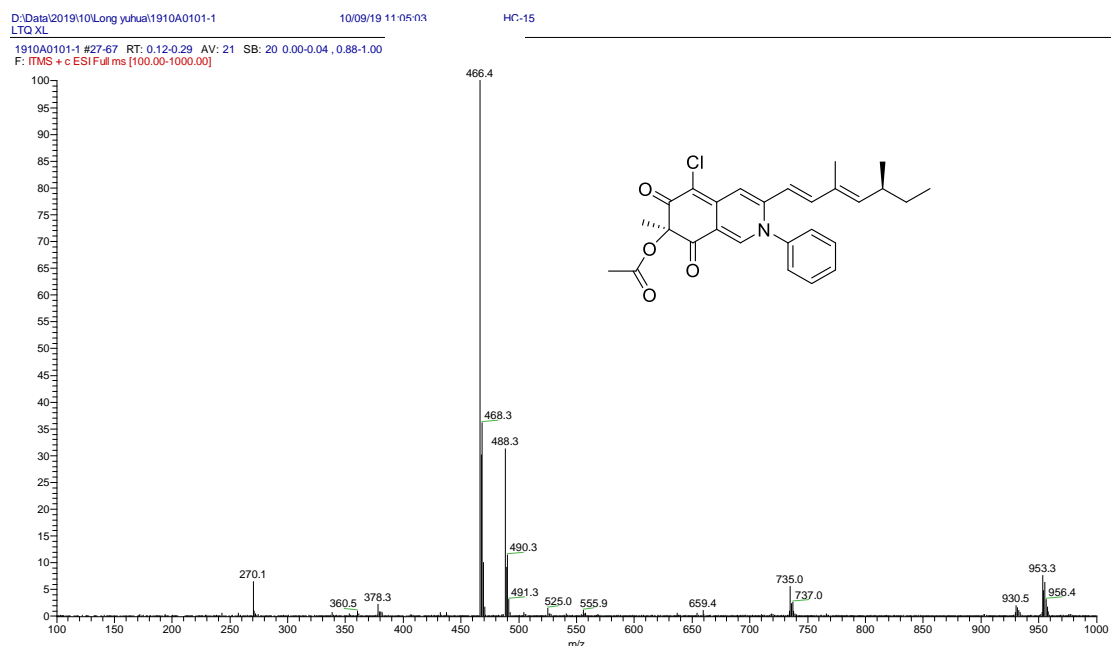

Fig.S41. MS spectrum of compound 15

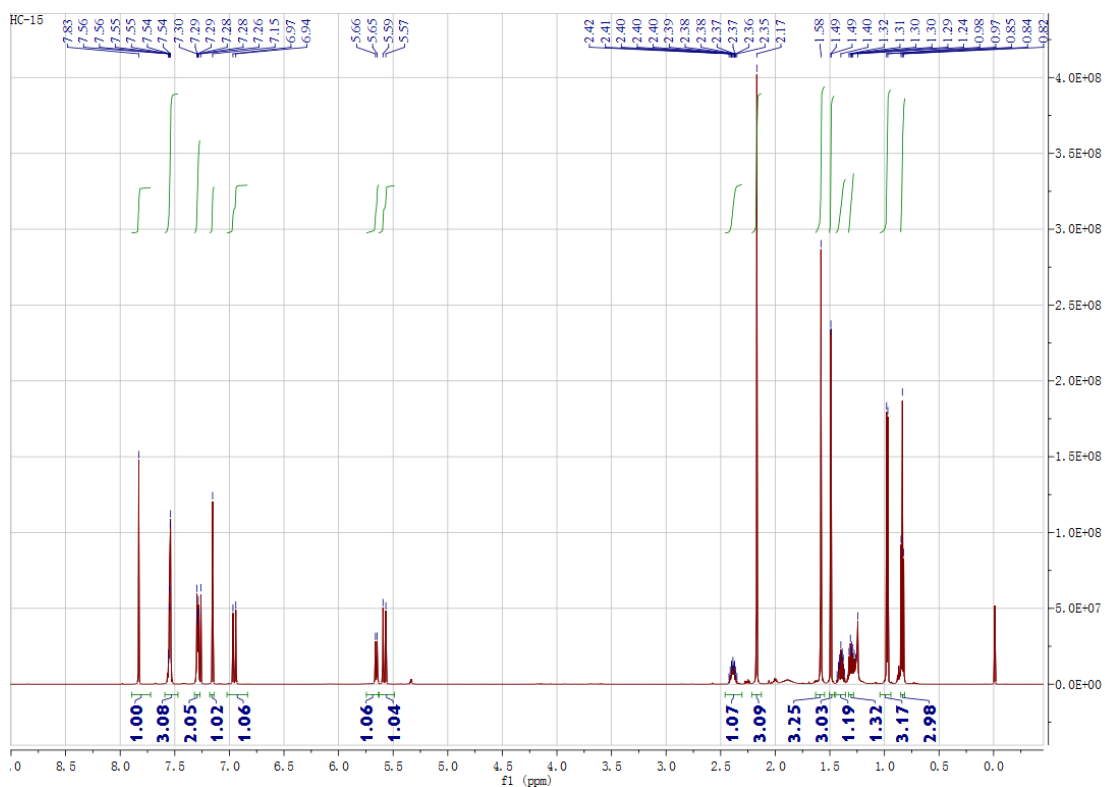

Fig.S42.  $^1\text{H}$  NMR (600 MHz,  $\text{CDCl}_3$ ) spectrum of compound 15

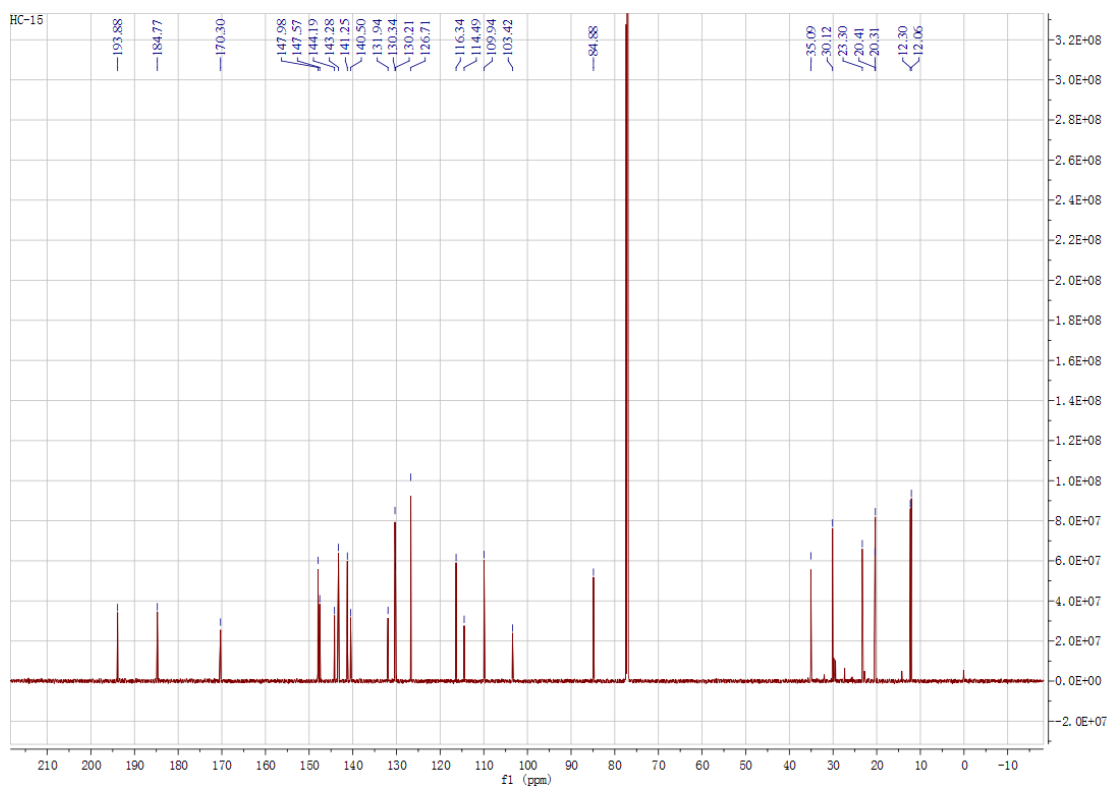

**Fig.S43.**  $^{13}\text{C}$  NMR (150 MHz,  $\text{CDCl}_3$ ) spectrum of compound **15**

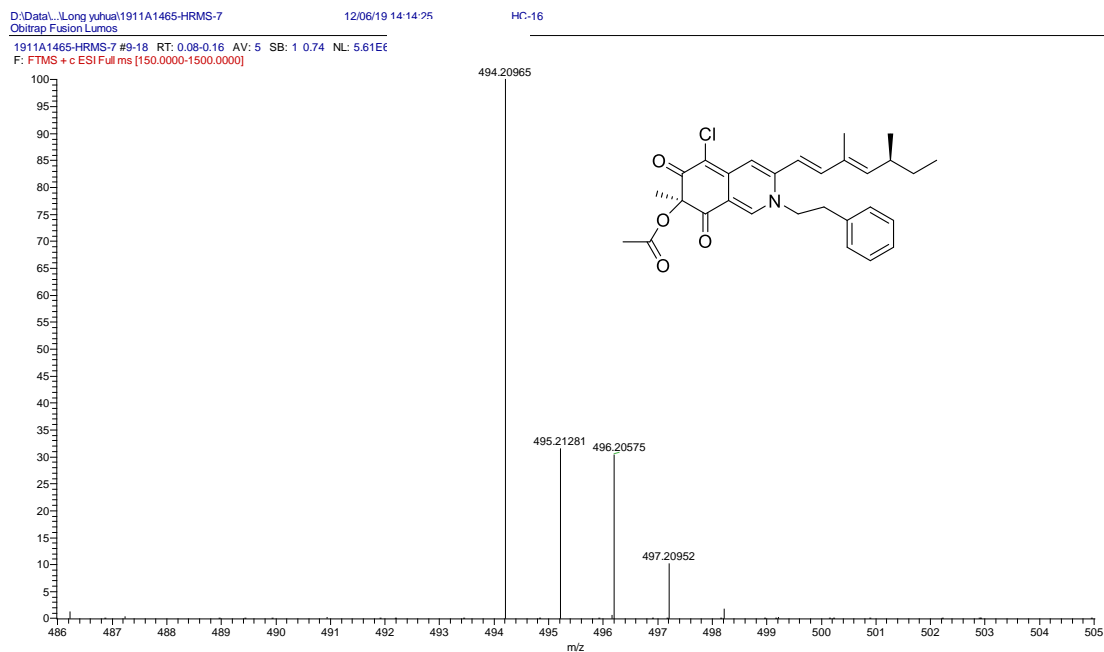

**Fig.S44.** MS spectrum of compound **16**

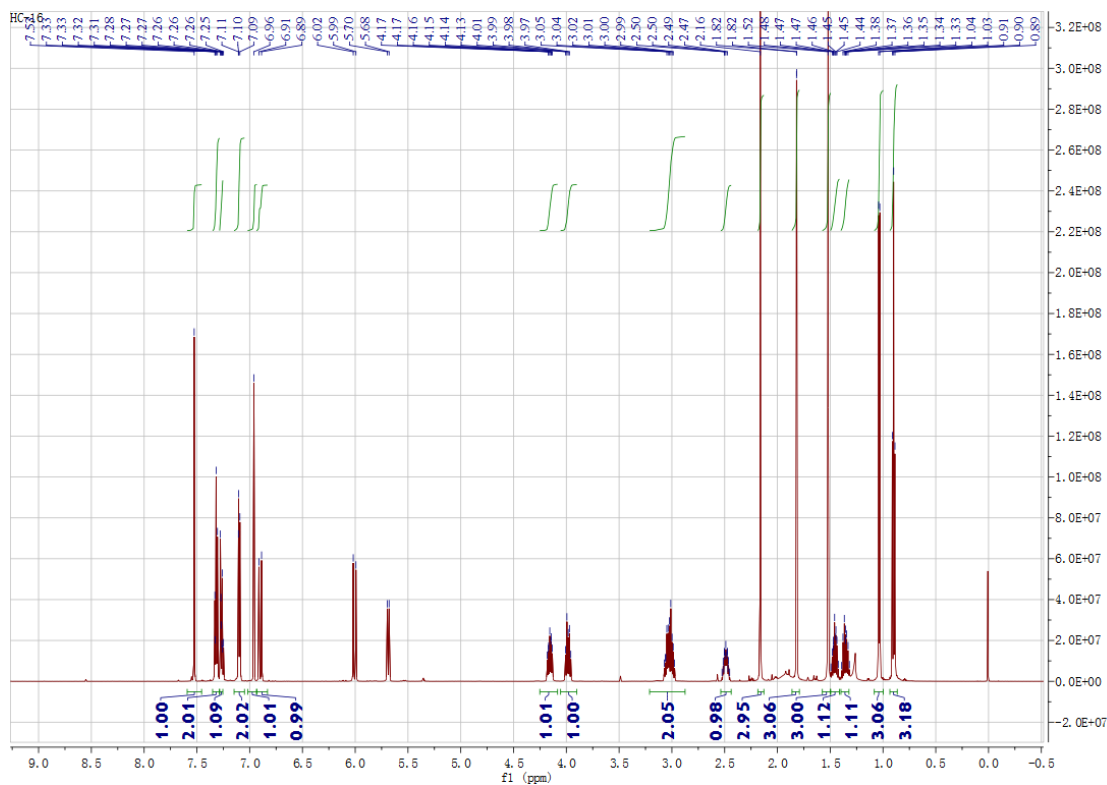

Fig.S45.  $^1\text{H}$  NMR (600 MHz,  $\text{CDCl}_3$ ) spectrum of compound 16

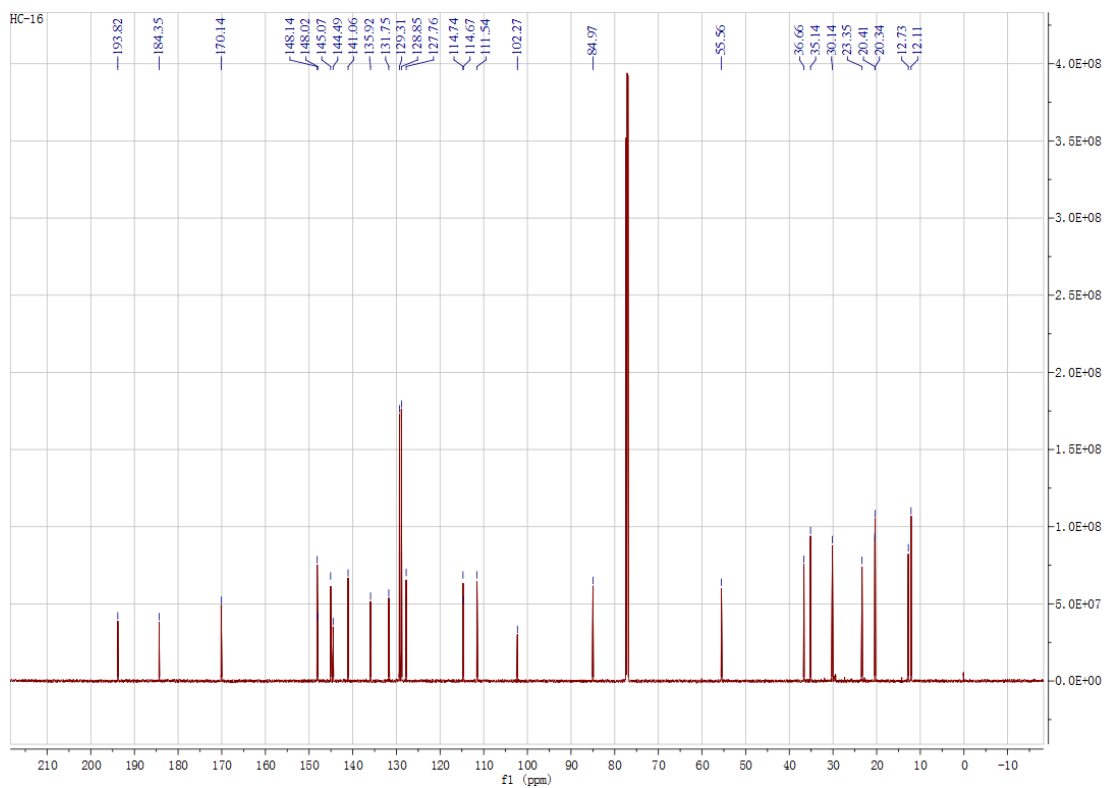

Fig.S46.  $^{13}\text{C}$  NMR (150 MHz,  $\text{CDCl}_3$ ) spectrum of compound 16

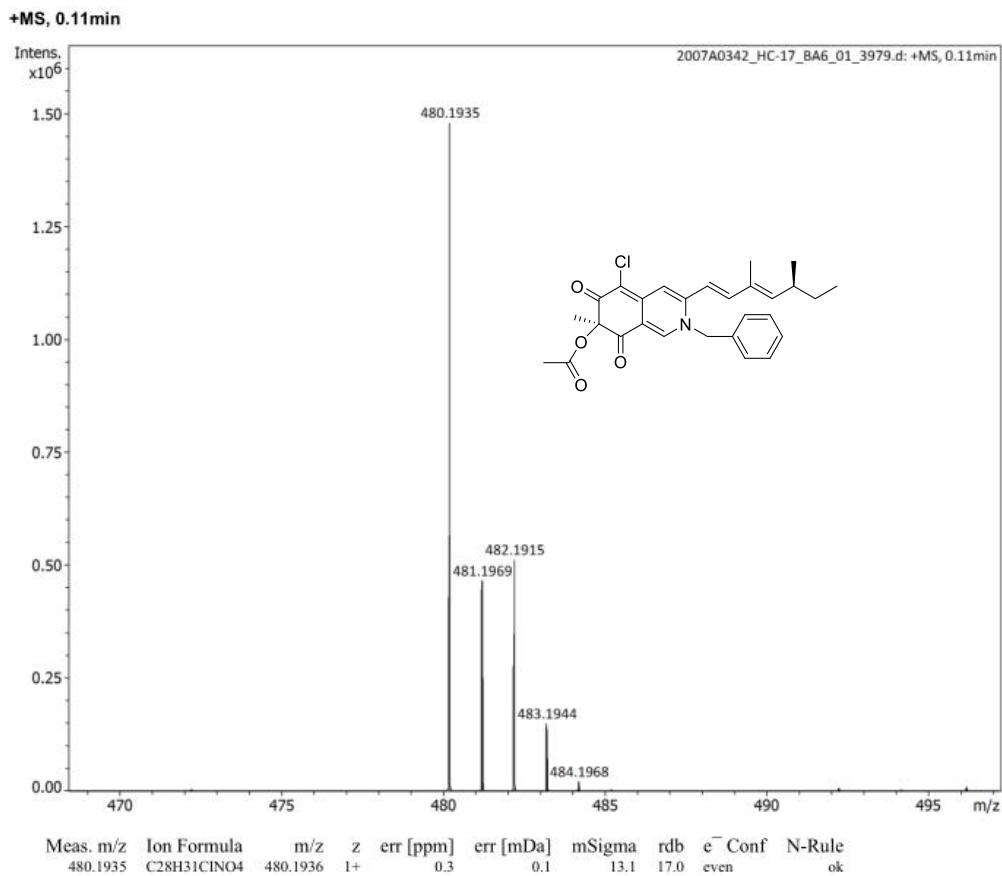

**Fig.S47. HRMS spectrum of compound 17**

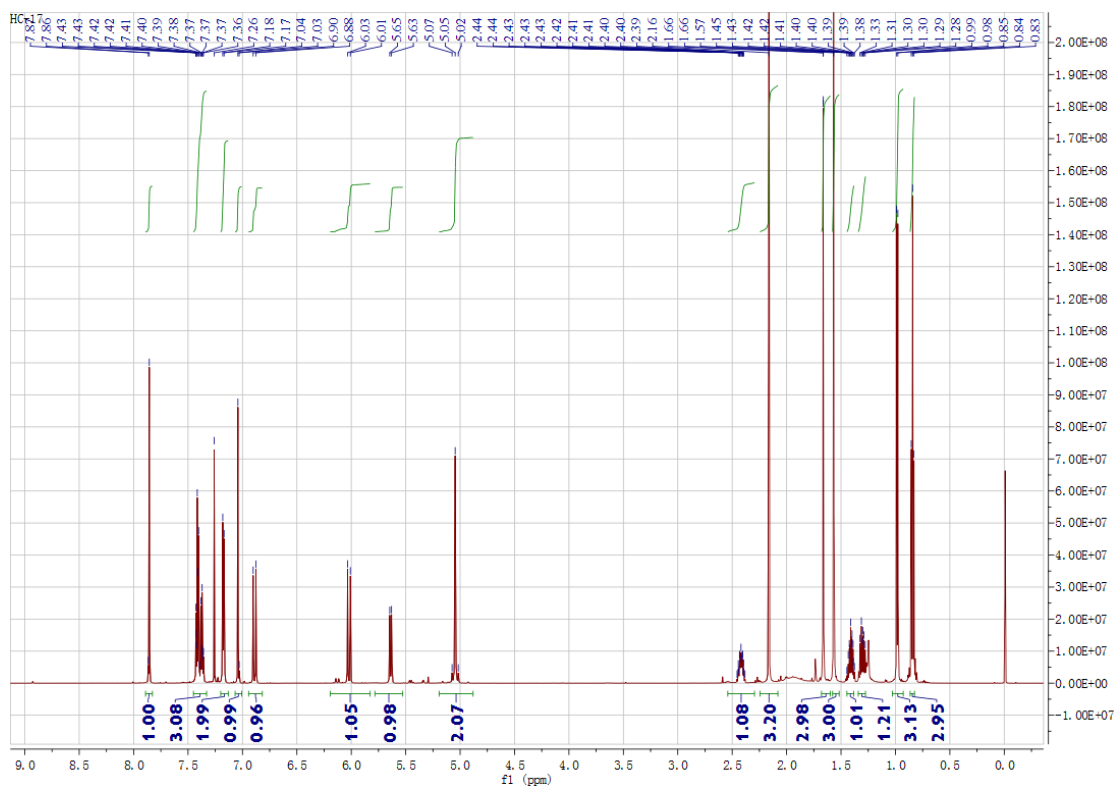

**Fig.S48. <sup>1</sup>H NMR (600 MHz, CDCl<sub>3</sub>) spectrum of compound 17**

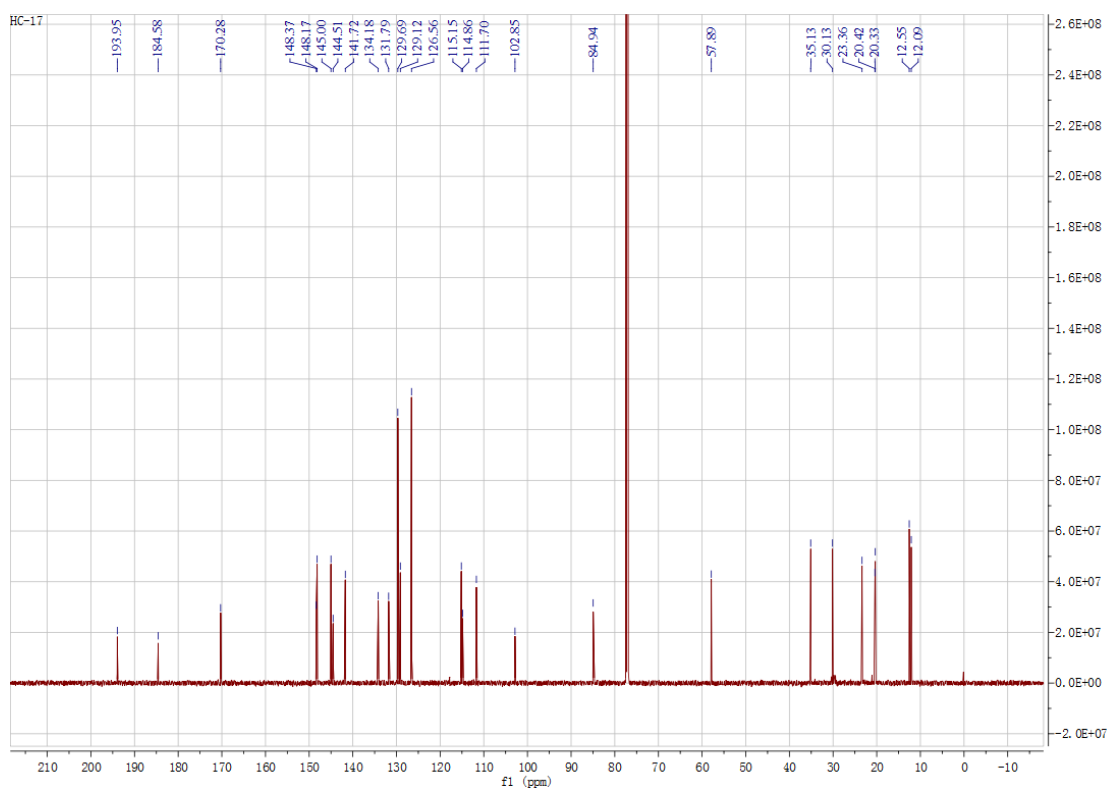

**Fig.S49.**  $^{13}\text{C}$  NMR (150 MHz,  $\text{CDCl}_3$ ) spectrum of compound 17

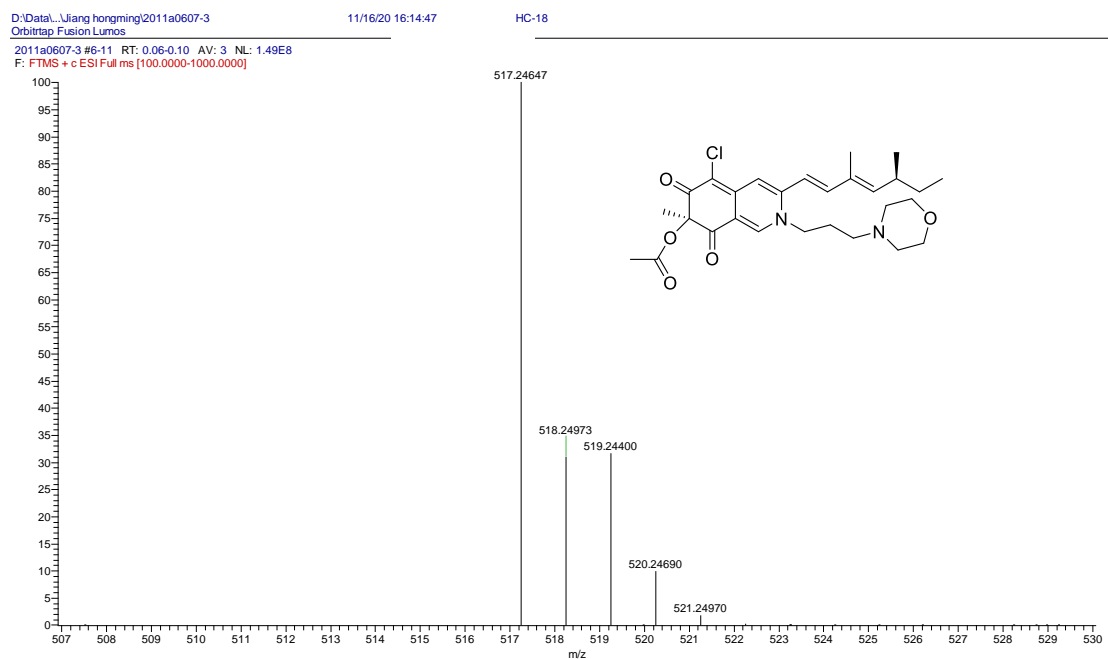

**Fig.S50.** HRMS spectrum of compound 18

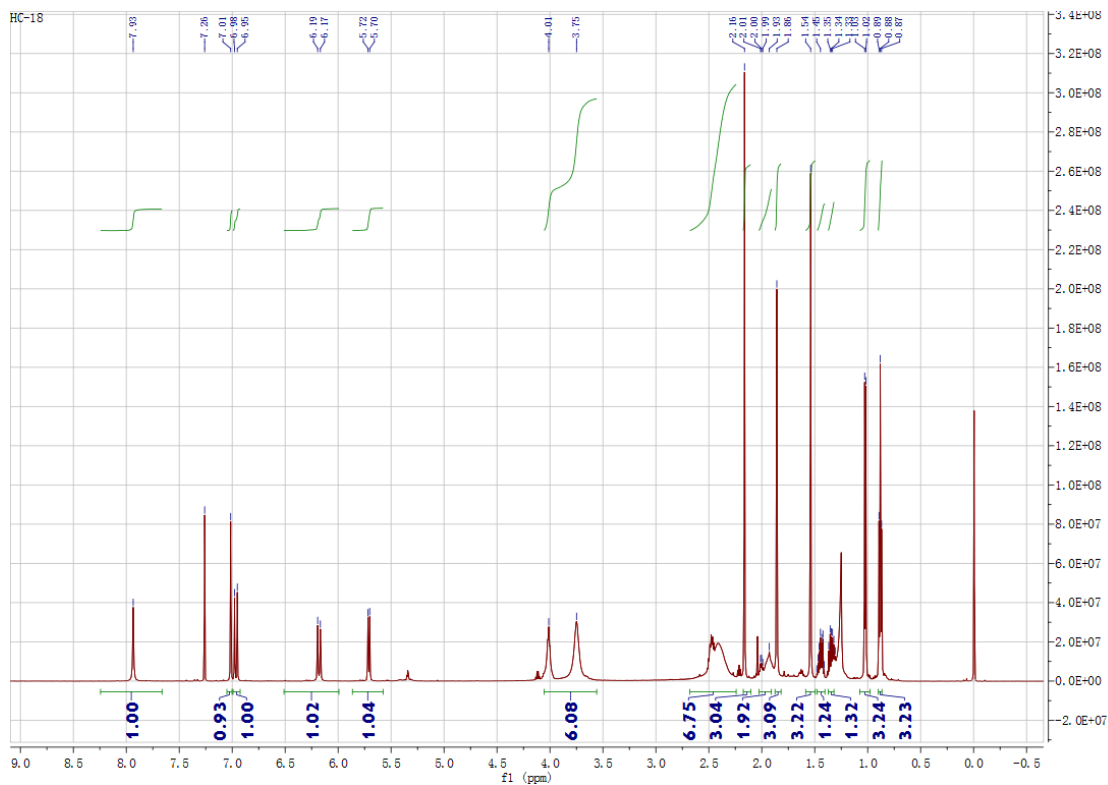

Fig.S51.  $^1\text{H}$  NMR (600 MHz,  $\text{CDCl}_3$ ) spectrum of compound 18

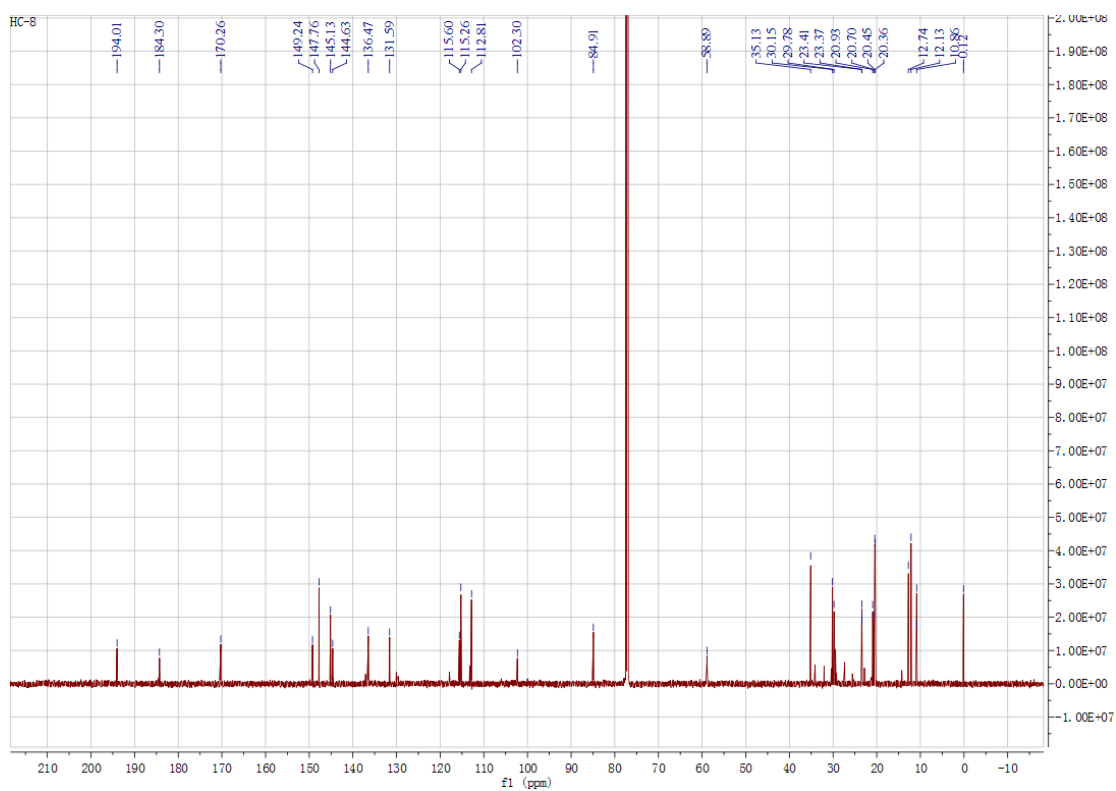

Fig.S52.  $^{13}\text{C}$  NMR (150 MHz,  $\text{CDCl}_3$ ) spectrum of compound 18

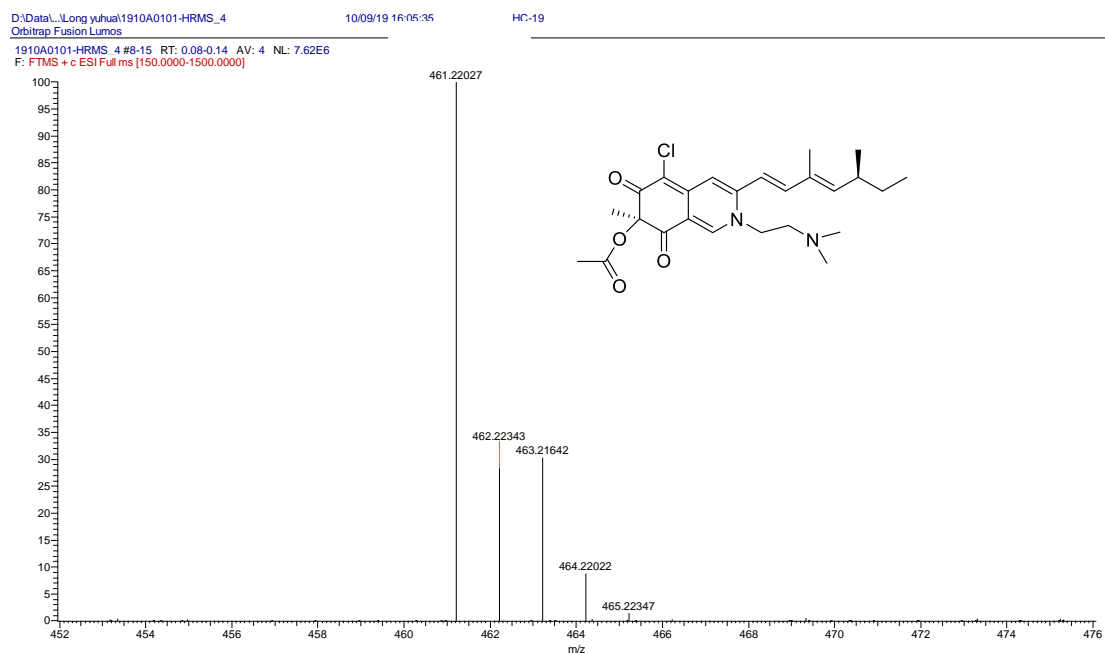

Fig.S53. HRMS spectrum of compound 19

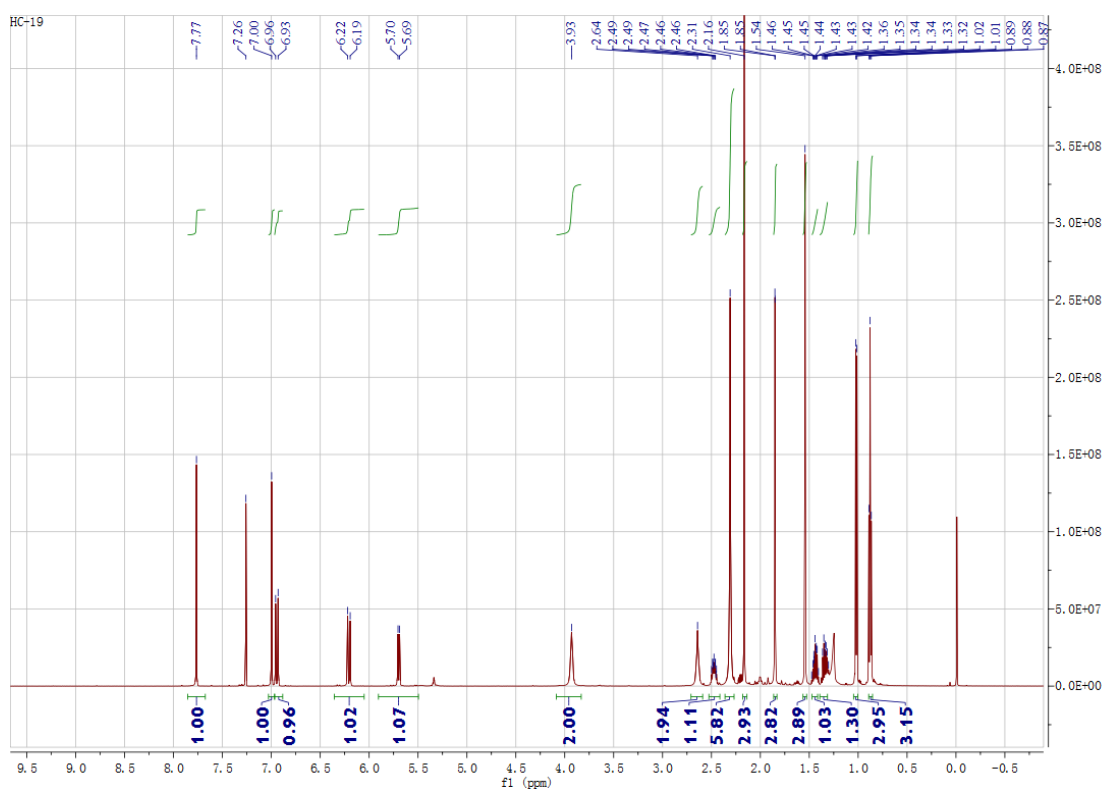

Fig.S54. <sup>1</sup>H NMR (600 MHz, CDCl<sub>3</sub>) spectrum of compound 19

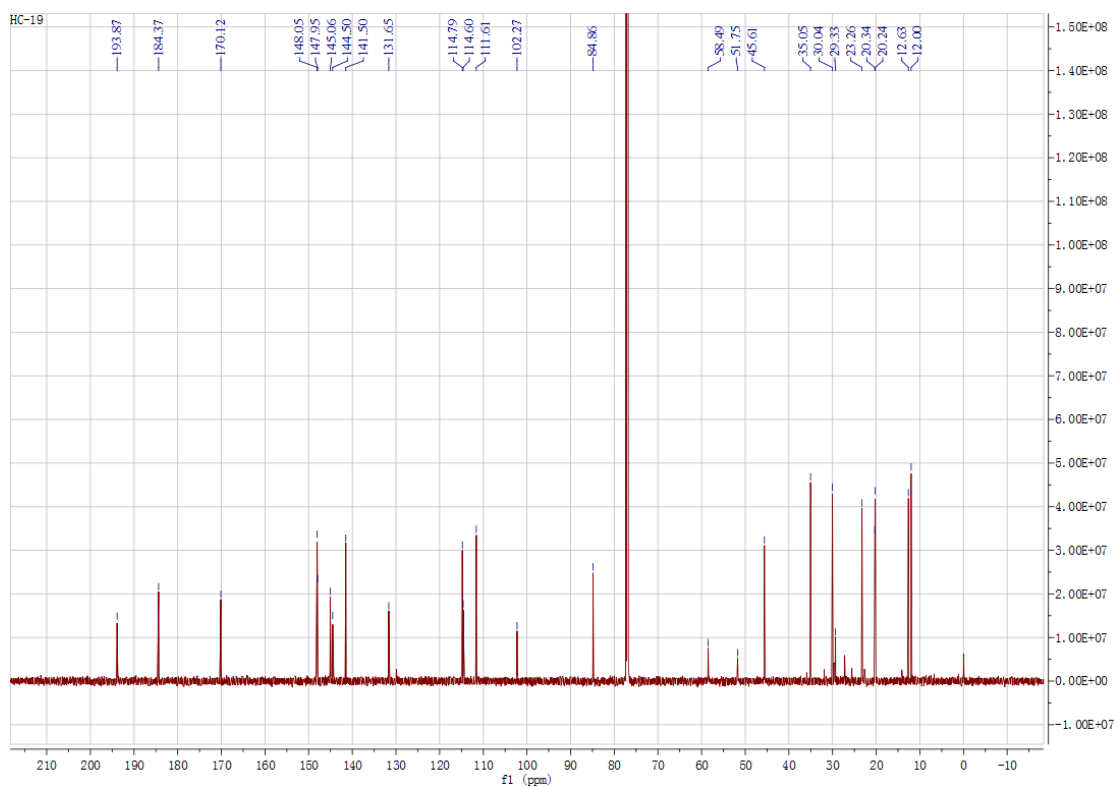

Fig.S55.  $^{13}\text{C}$  NMR (150 MHz,  $\text{CDCl}_3$ ) spectrum of compound 19

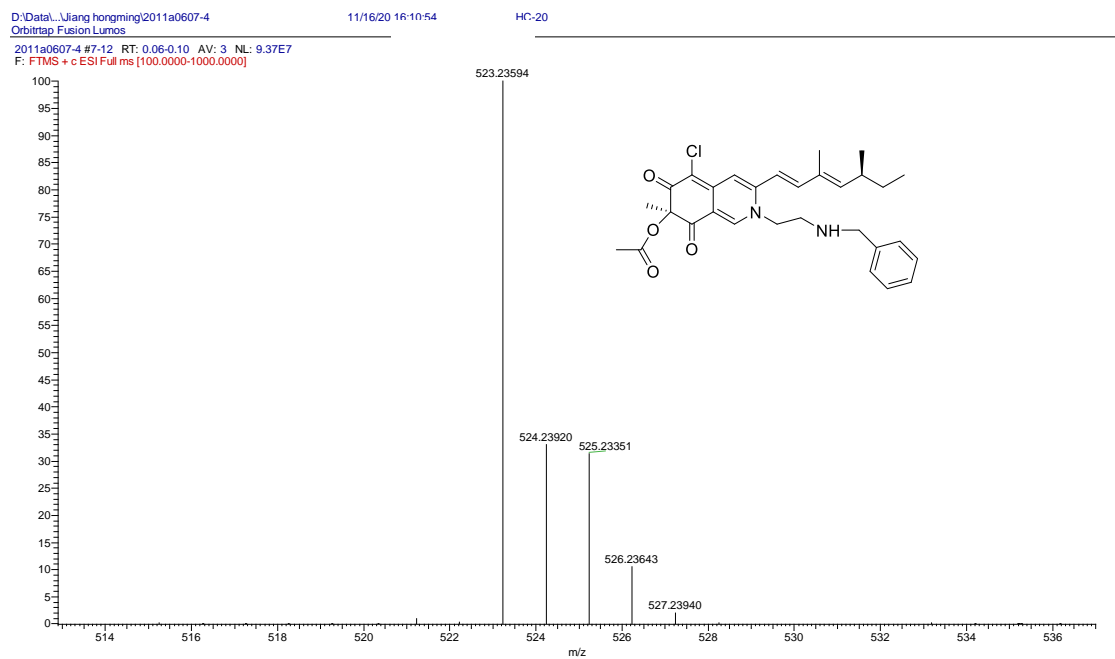

Fig.S56. HRMS spectrum of compound 20



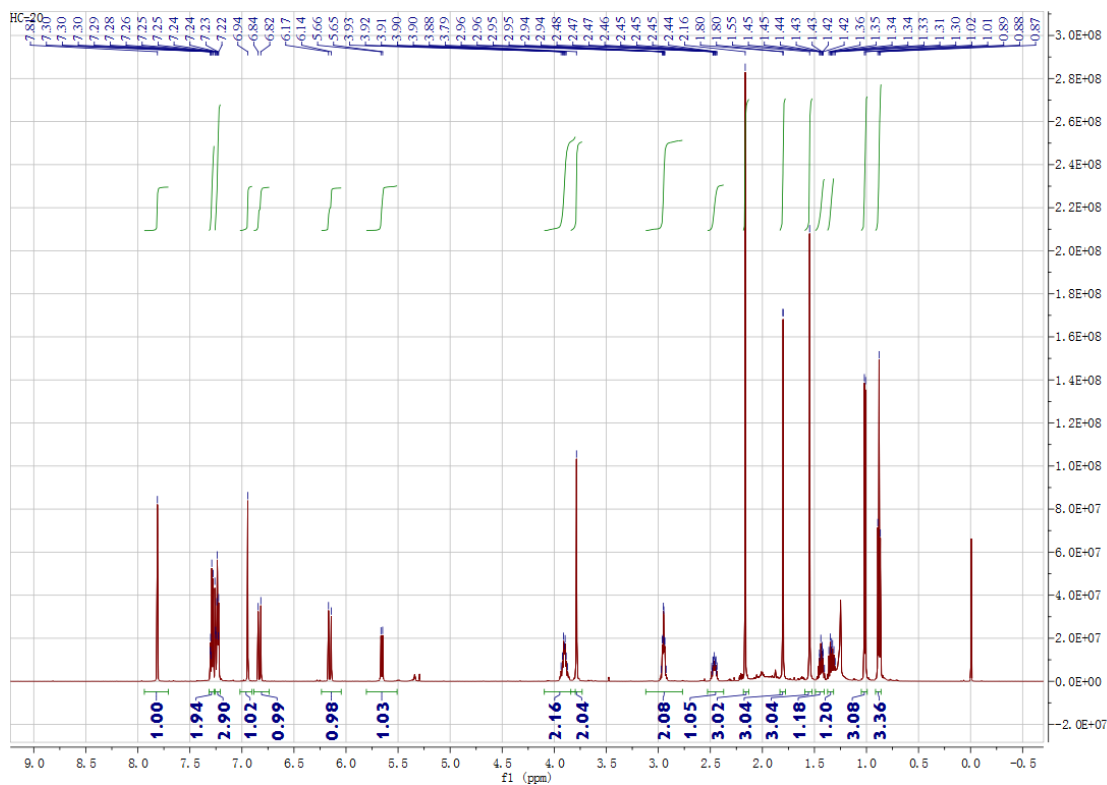

Fig.S57.  $^1\text{H}$  NMR (600 MHz,  $\text{CDCl}_3$ ) spectrum of compound 20

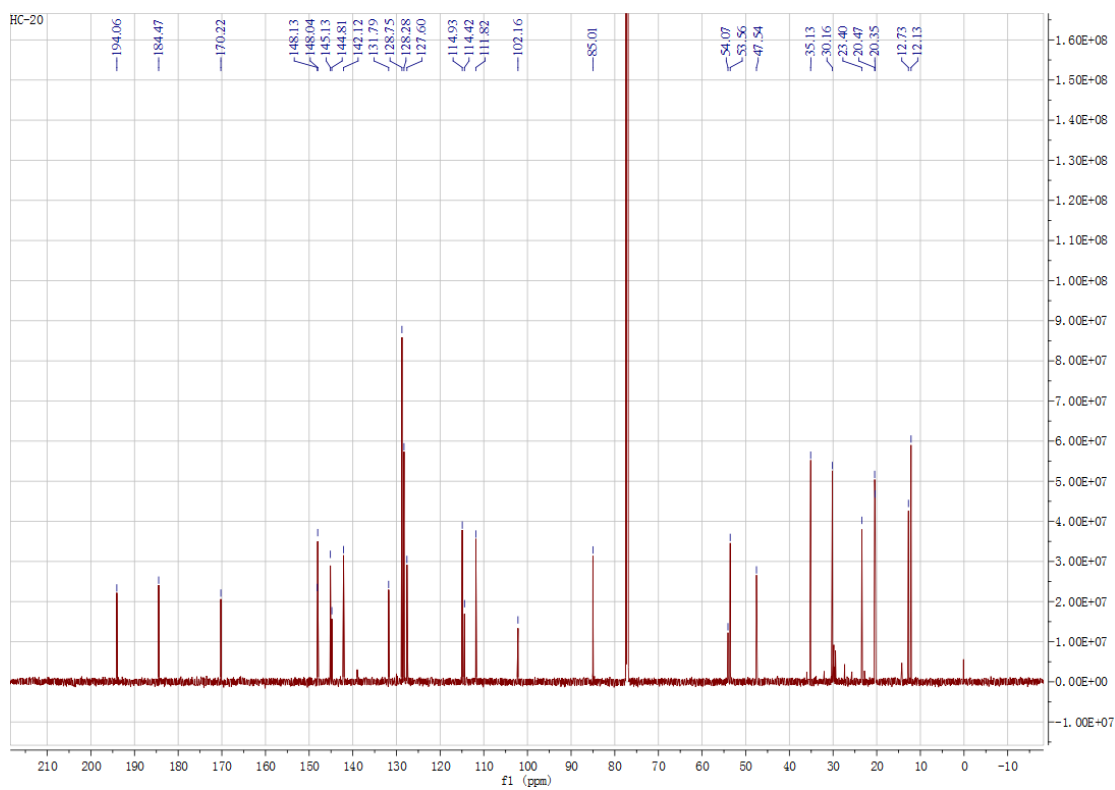

Fig.S58.  $^{13}\text{C}$  NMR (150 MHz,  $\text{CDCl}_3$ ) spectrum of compound 20

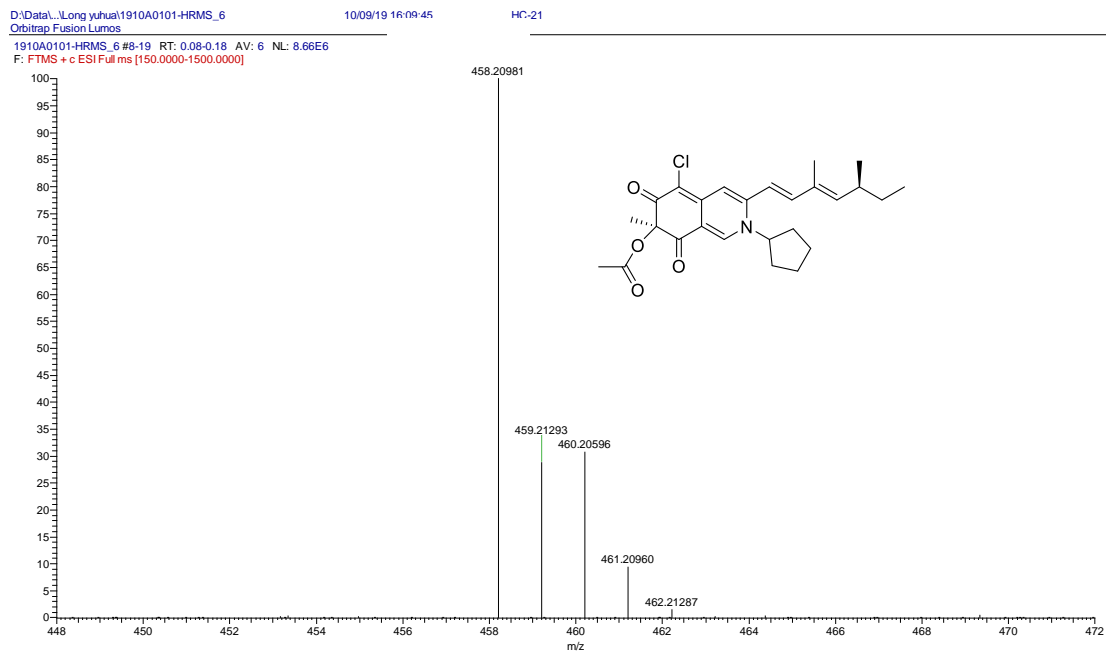

**Fig.S59.** HRMS spectrum of compound **21**

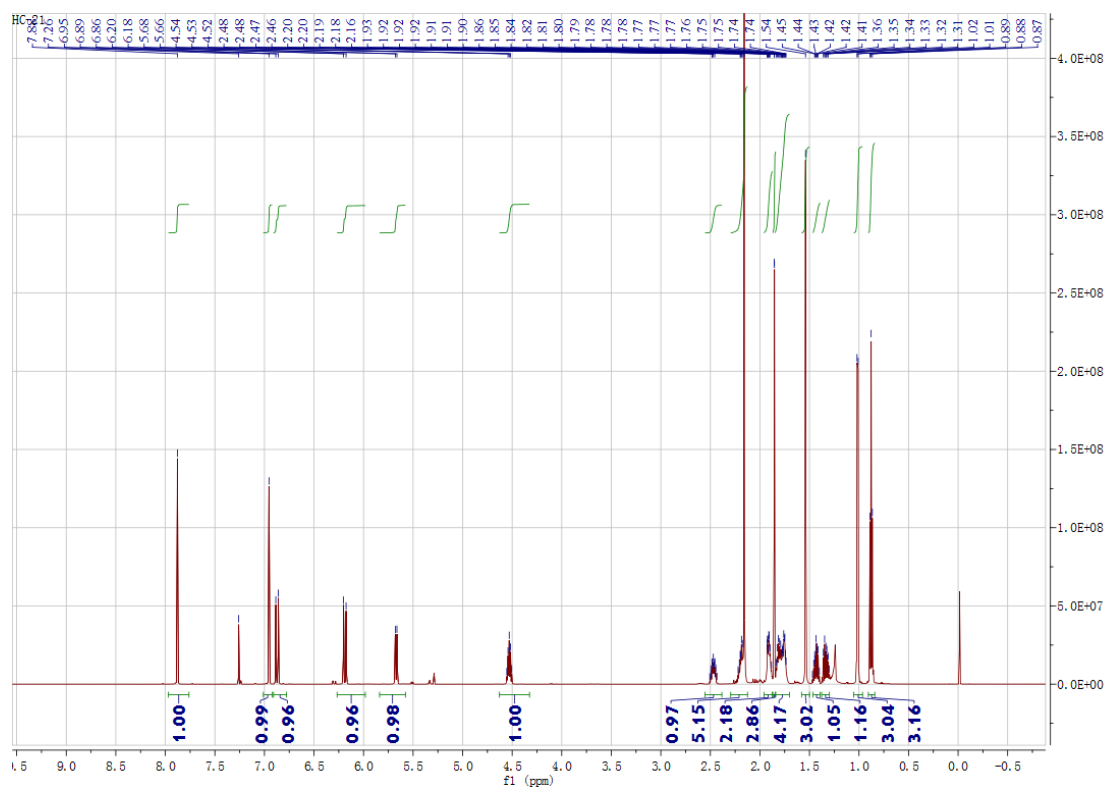

**Fig.S60.**  $^1\text{H}$  NMR (600 MHz,  $\text{CDCl}_3$ ) spectrum of compound **21**

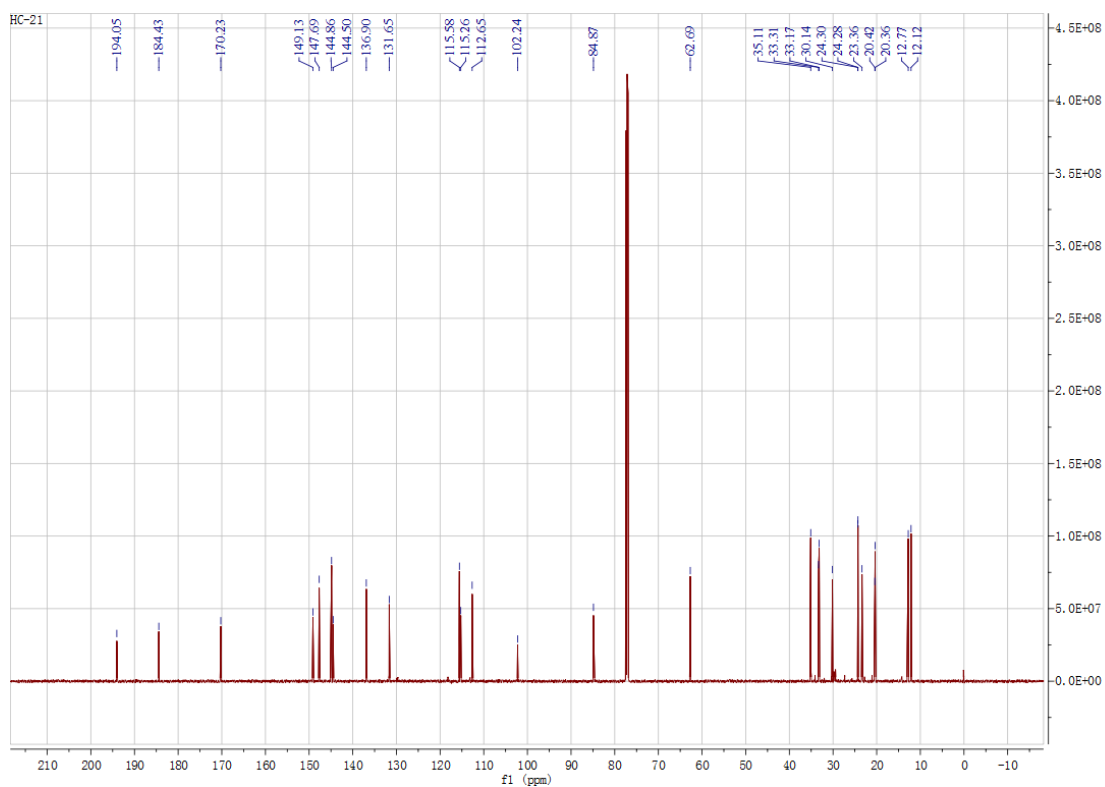

**Fig.S61.  $^{13}\text{C}$  NMR (150 MHz,  $\text{CDCl}_3$ ) spectrum of compound 21**

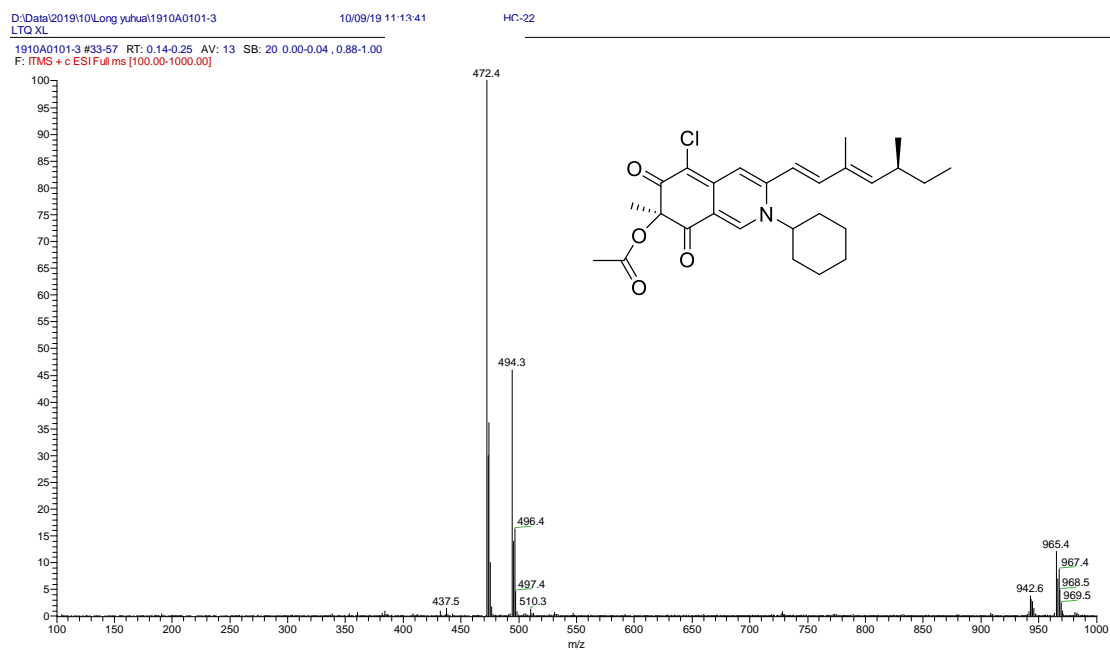

**Fig.S62. MS spectrum of compound 22**

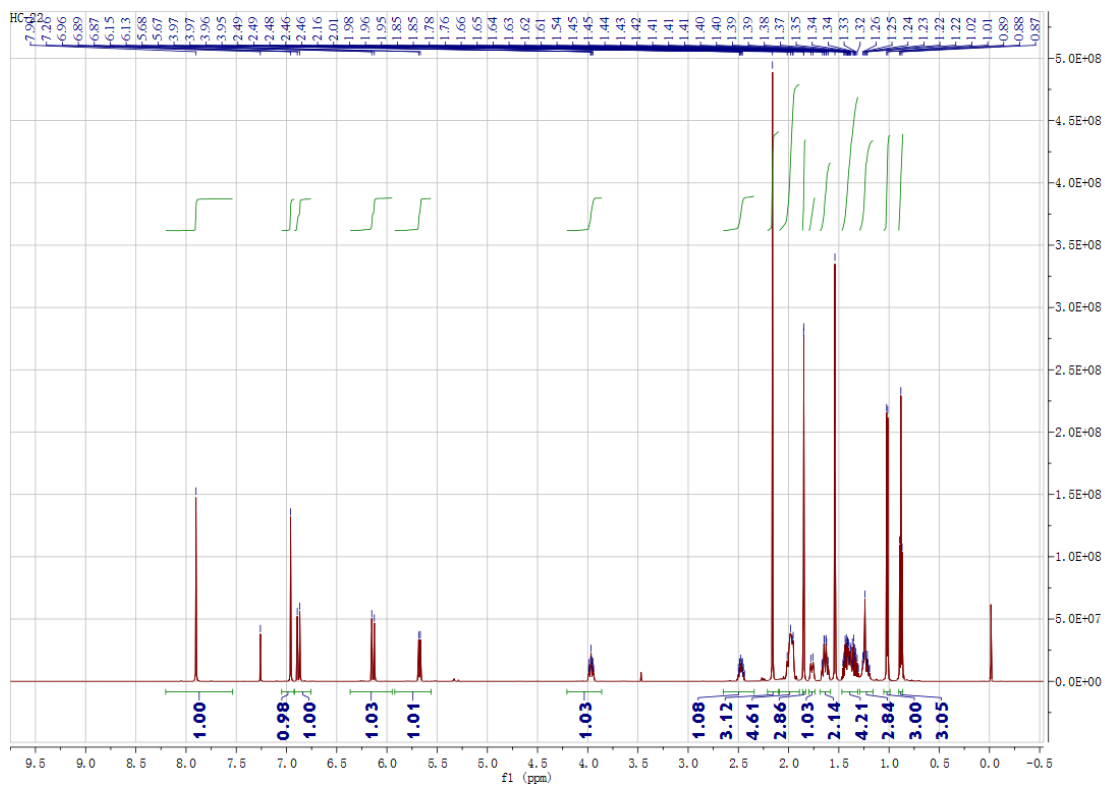

**Fig.S63.**  $^1\text{H}$  NMR (600 MHz,  $\text{CDCl}_3$ ) spectrum of compound **22**

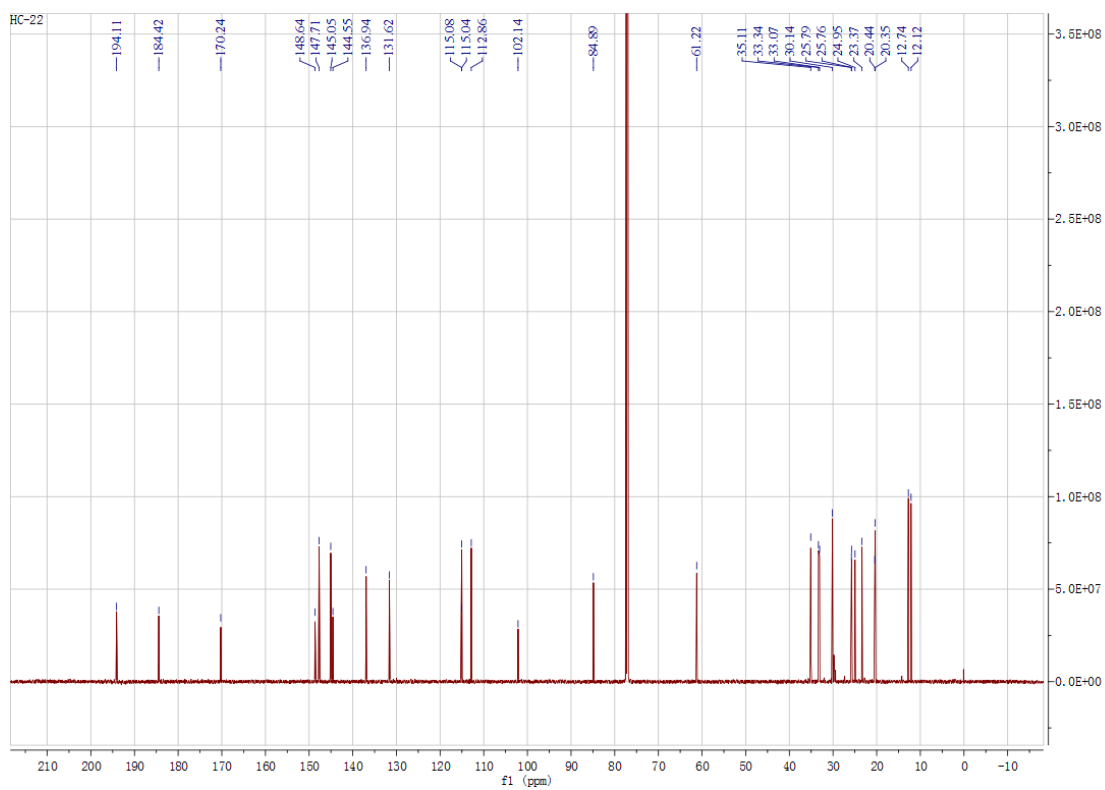

**Fig.S64.**  $^{13}\text{C}$  NMR (150 MHz,  $\text{CDCl}_3$ ) spectrum of compound **22**

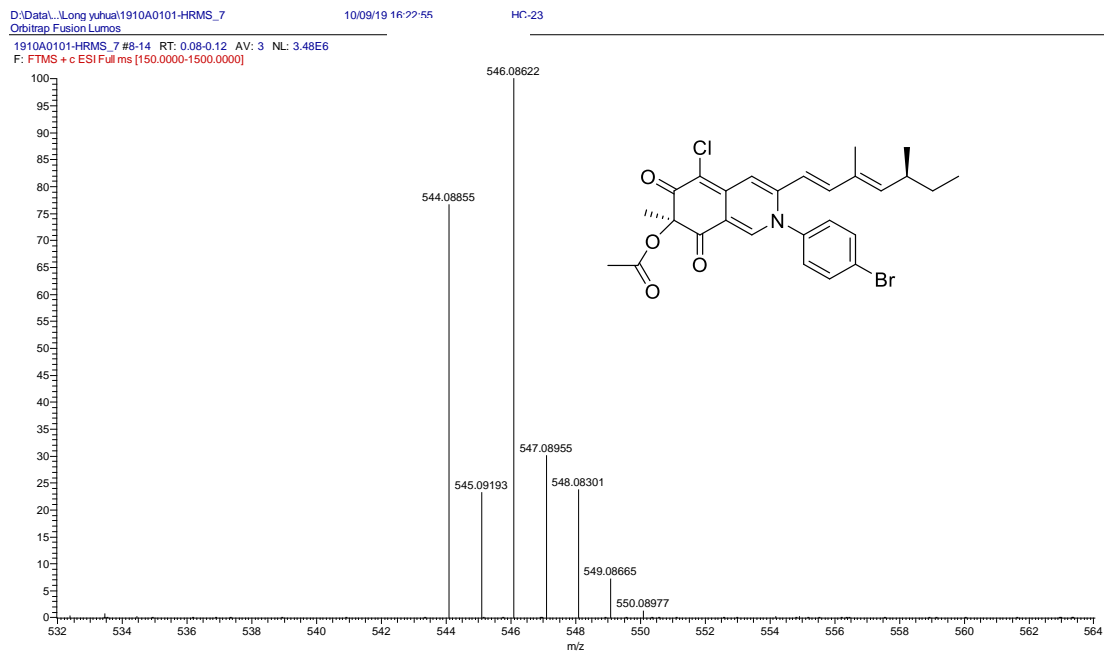

Fig.S65. HRMS spectrum of compound 23

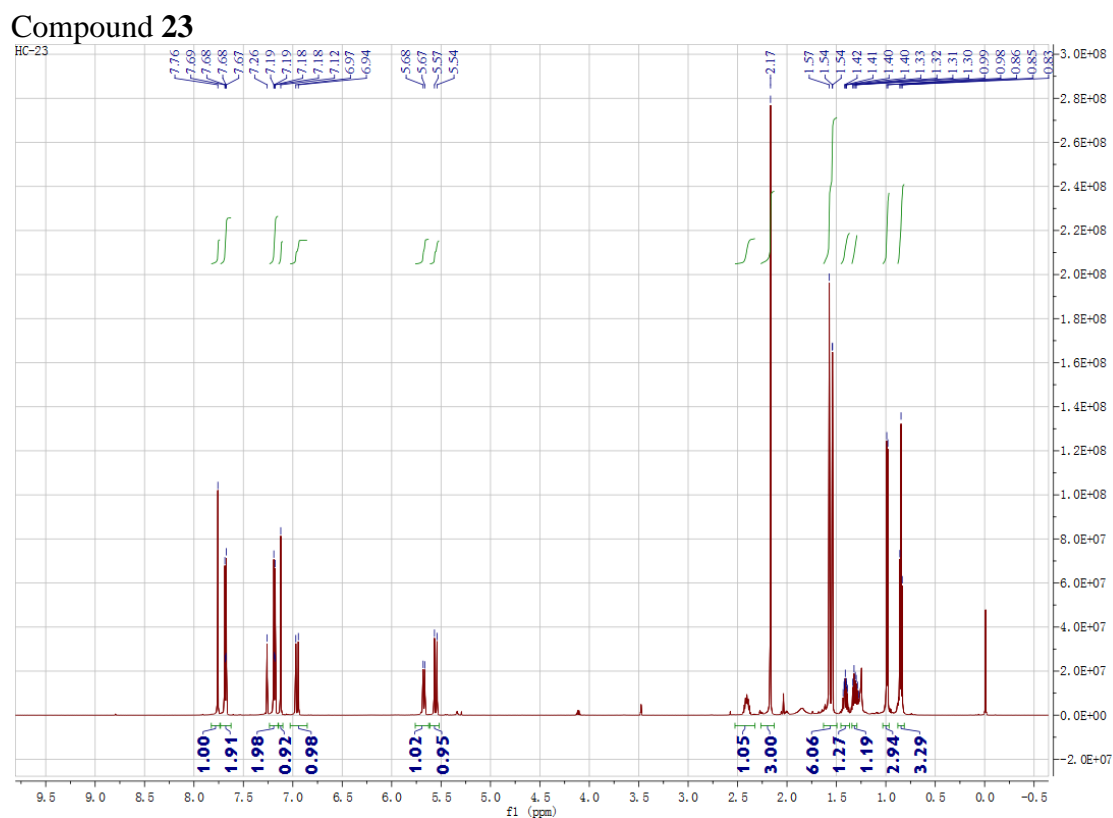

Fig.S66. <sup>1</sup>H NMR (600 MHz, CDCl<sub>3</sub>) spectrum of compound 23

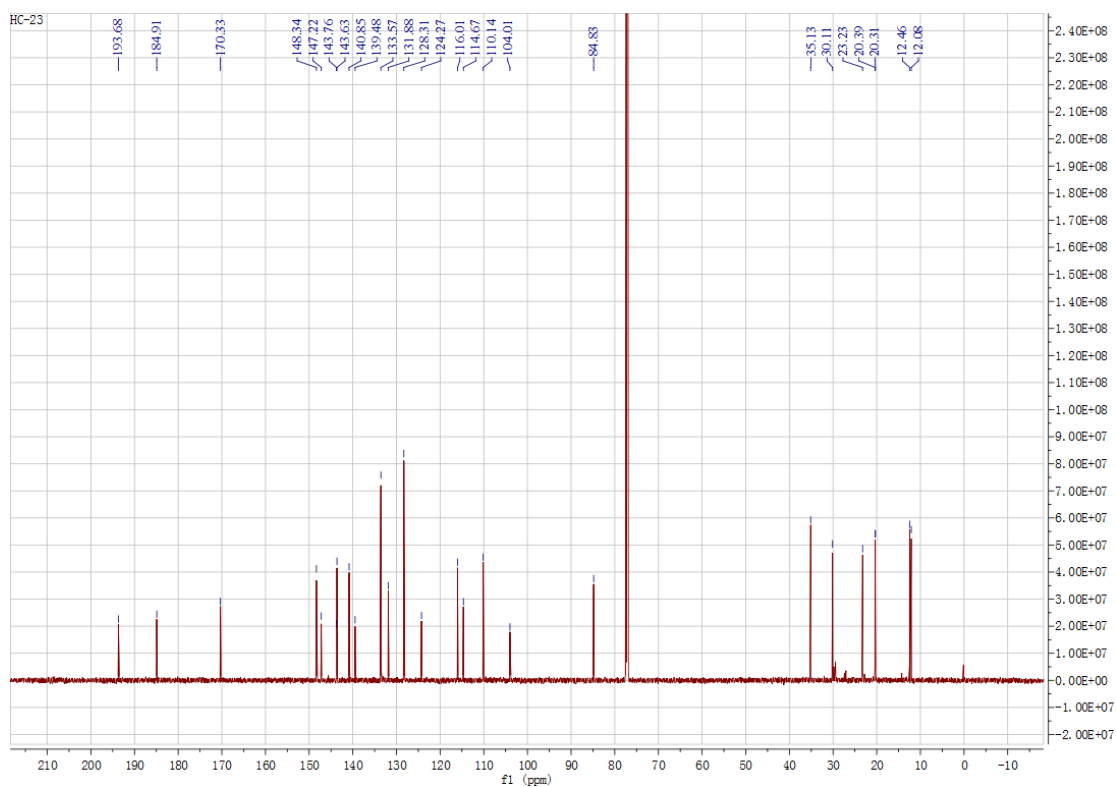

**Fig.S67.  $^{13}\text{C}$  NMR (150 MHz,  $\text{CDCl}_3$ ) spectrum of compound 23**

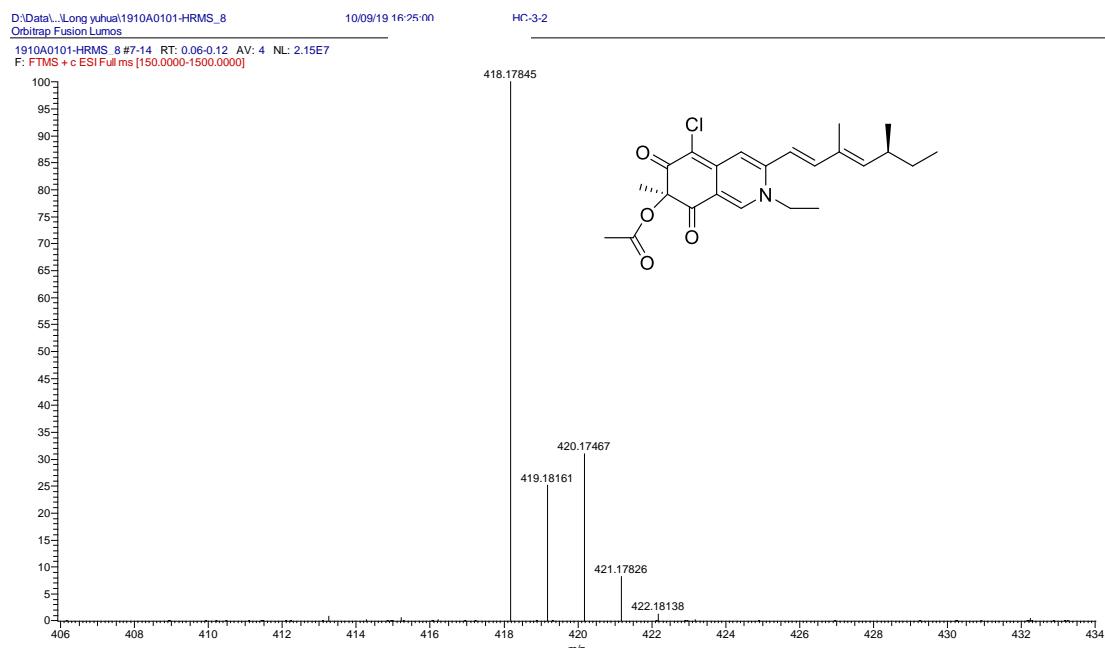

**Fig.S68. HRMS spectrum of compound 24**

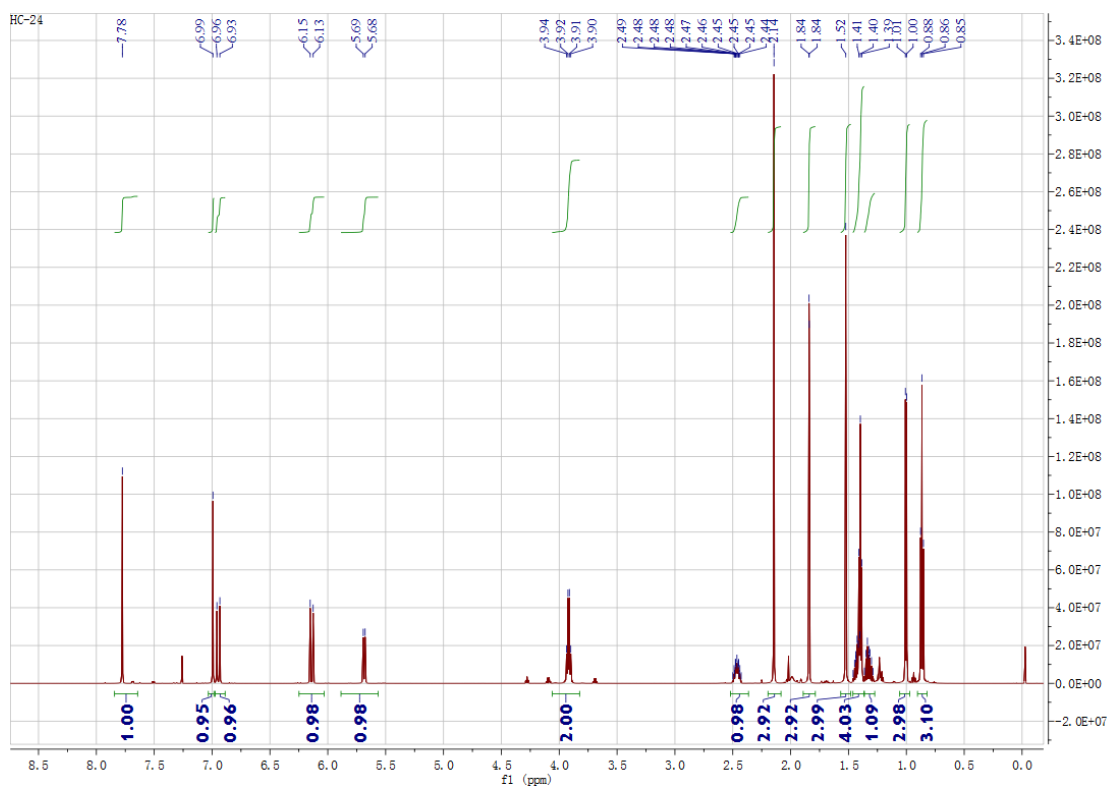

Fig.S69.  $^1\text{H}$  NMR (600 MHz,  $\text{CDCl}_3$ ) spectrum of compound 24

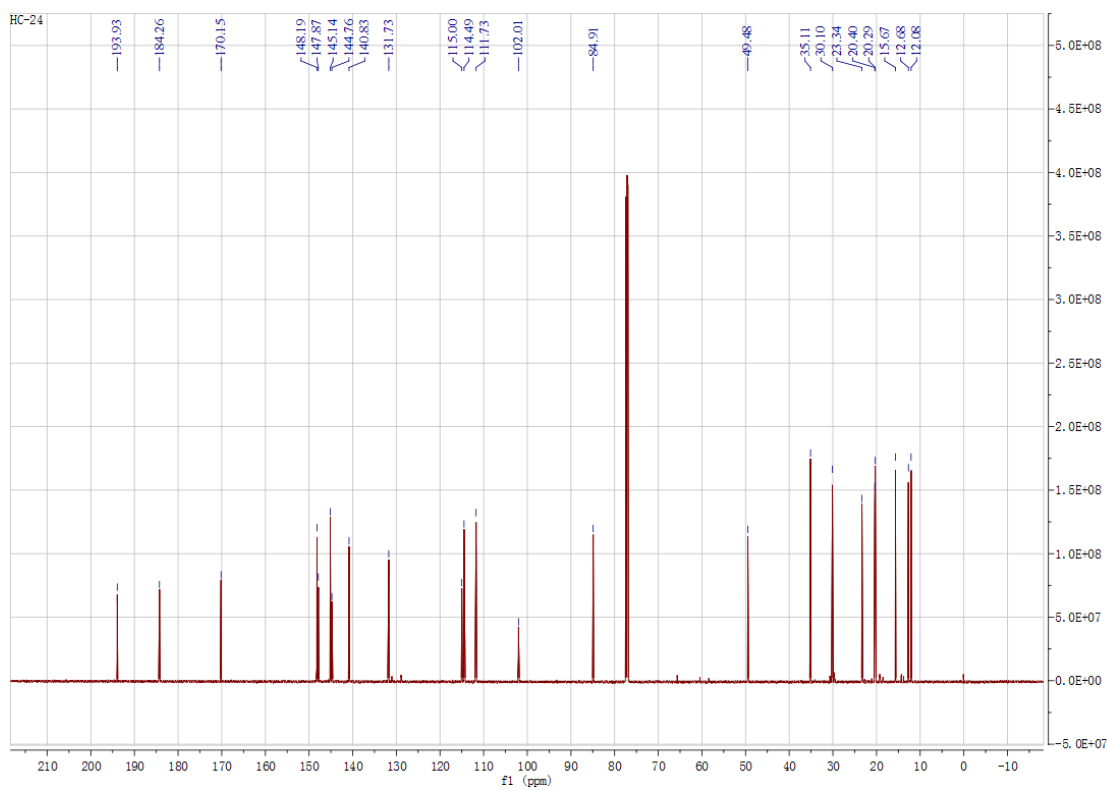

Fig.S70.  $^{13}\text{C}$  NMR (150 MHz,  $\text{CDCl}_3$ ) spectrum of compound 24

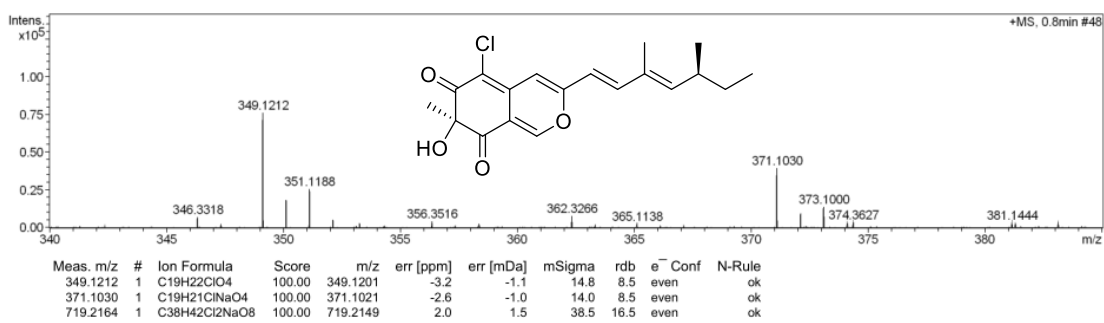

**Fig.S71.** HRMS spectrum of compound 25

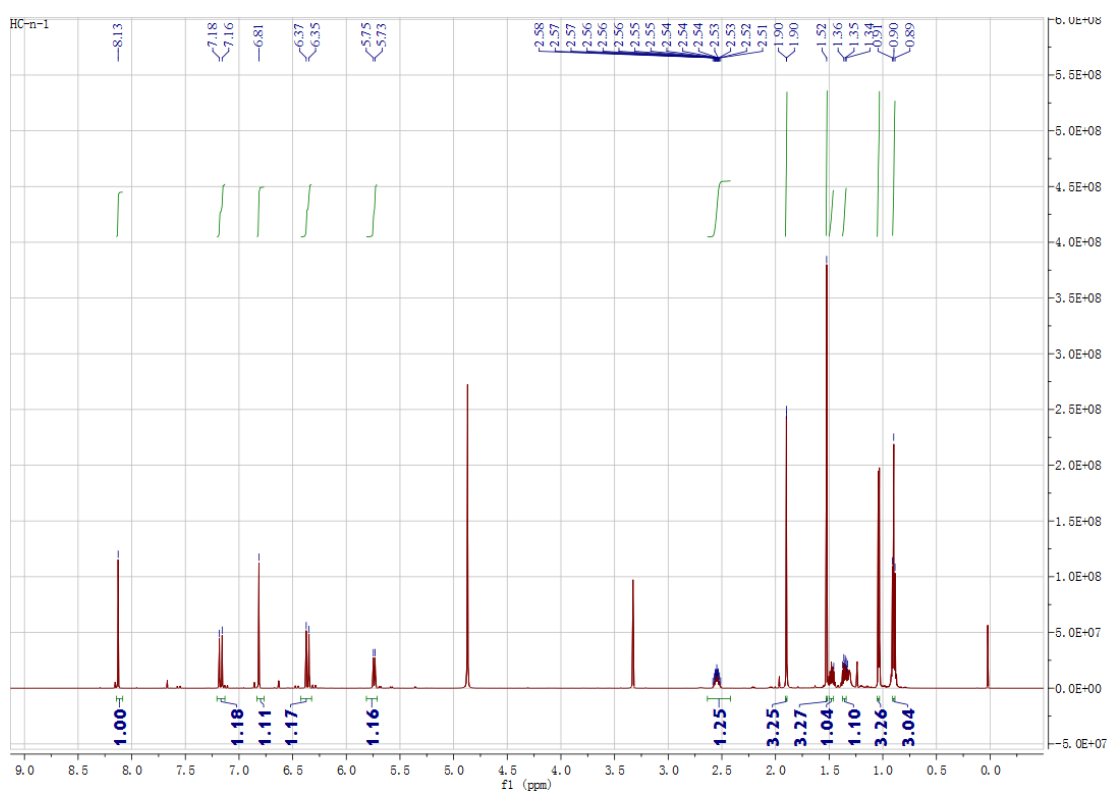

**Fig.S72.** <sup>1</sup>H NMR (600 MHz, CDCl<sub>3</sub>) spectrum of compound 25



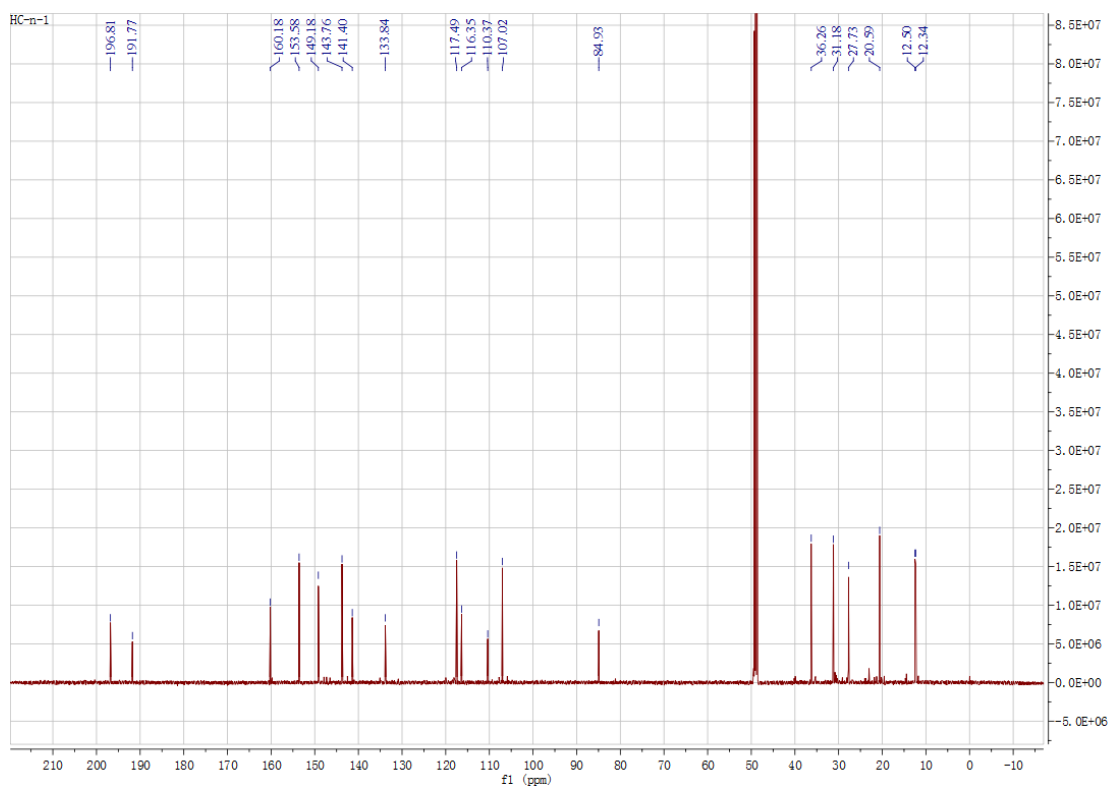

**Fig.S73.**  $^{13}\text{C}$  NMR (150 MHz,  $\text{CDCl}_3$ ) spectrum of compound 25

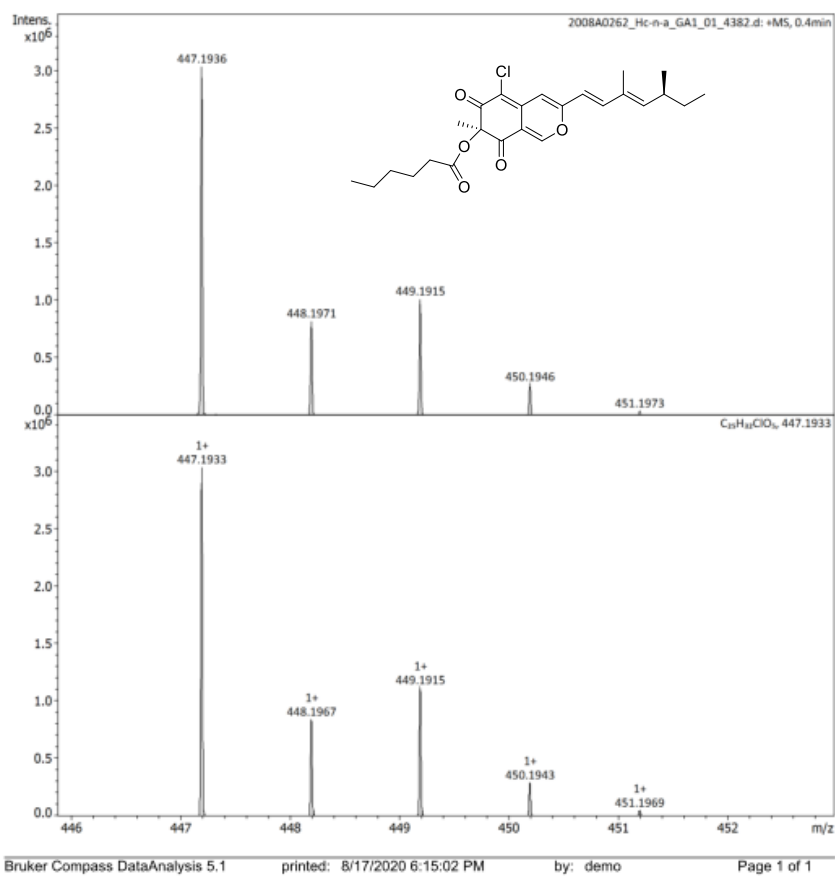

**Fig.S74. HRMS spectrum of compound 26**

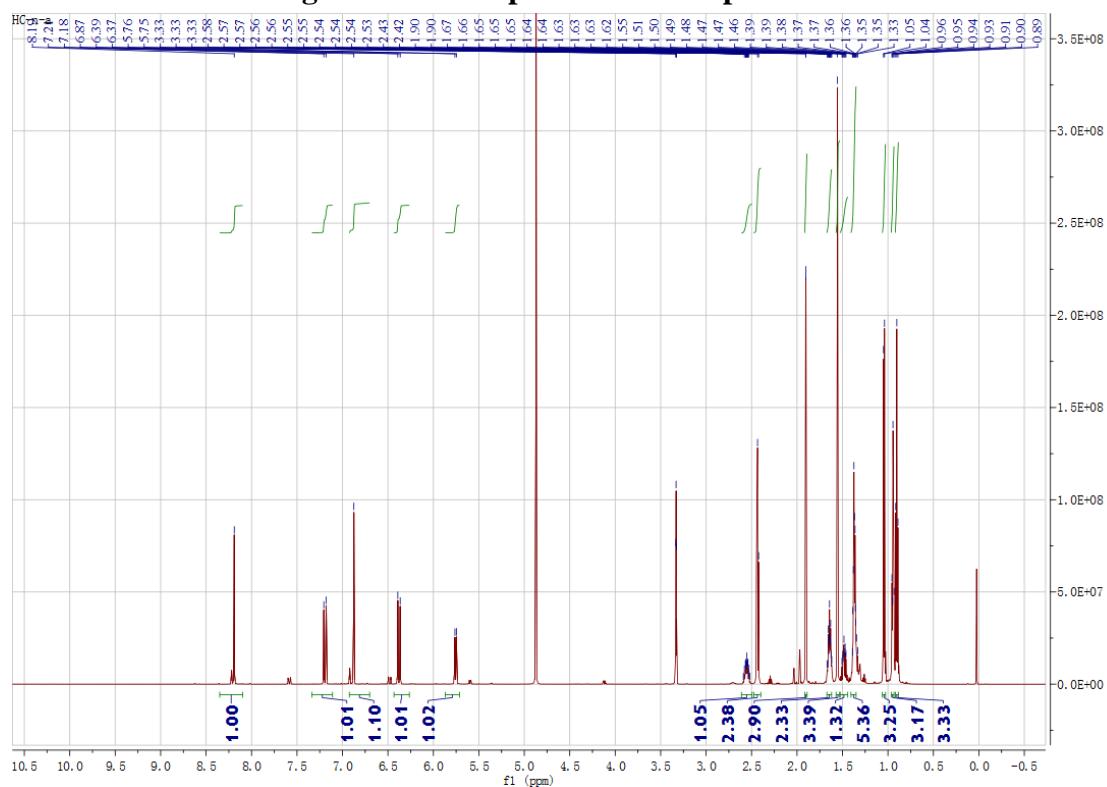

**Fig.S75.  $^1\text{H}$  NMR (600 MHz,  $\text{CDCl}_3$ ) spectrum of compound 26**

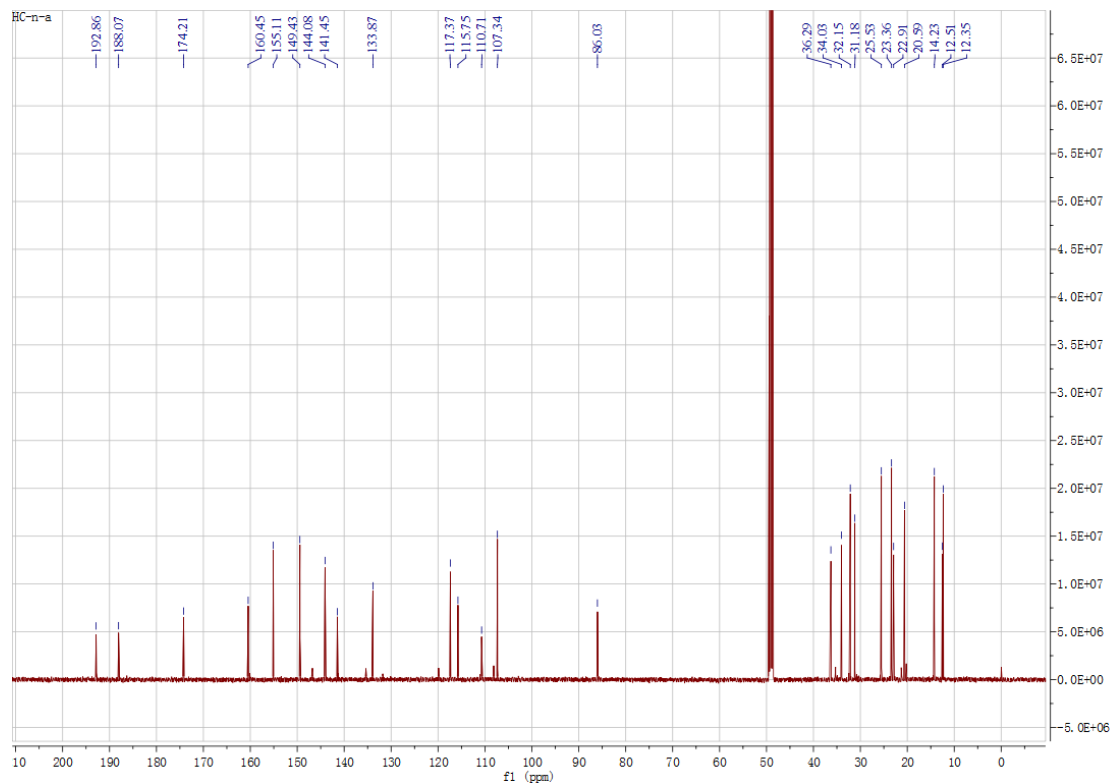

**Fig.S76.  $^{13}\text{C}$  NMR (150 MHz,  $\text{CDCl}_3$ ) spectrum of compound 26**

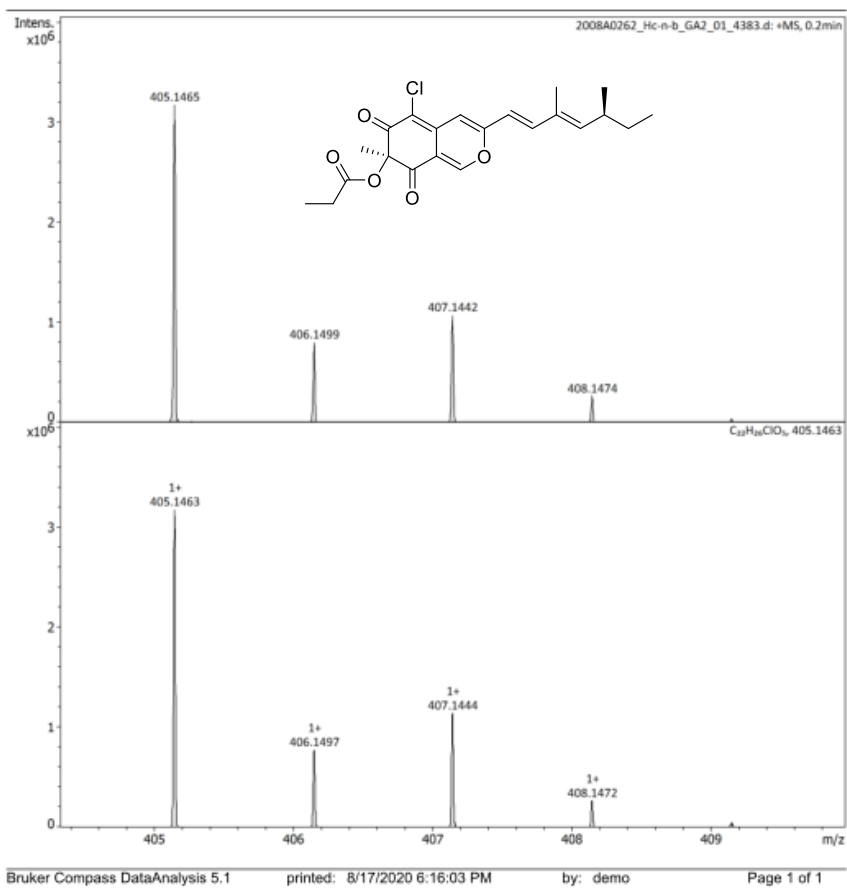

**Fig.S77. HRMS spectrum of compound 27**

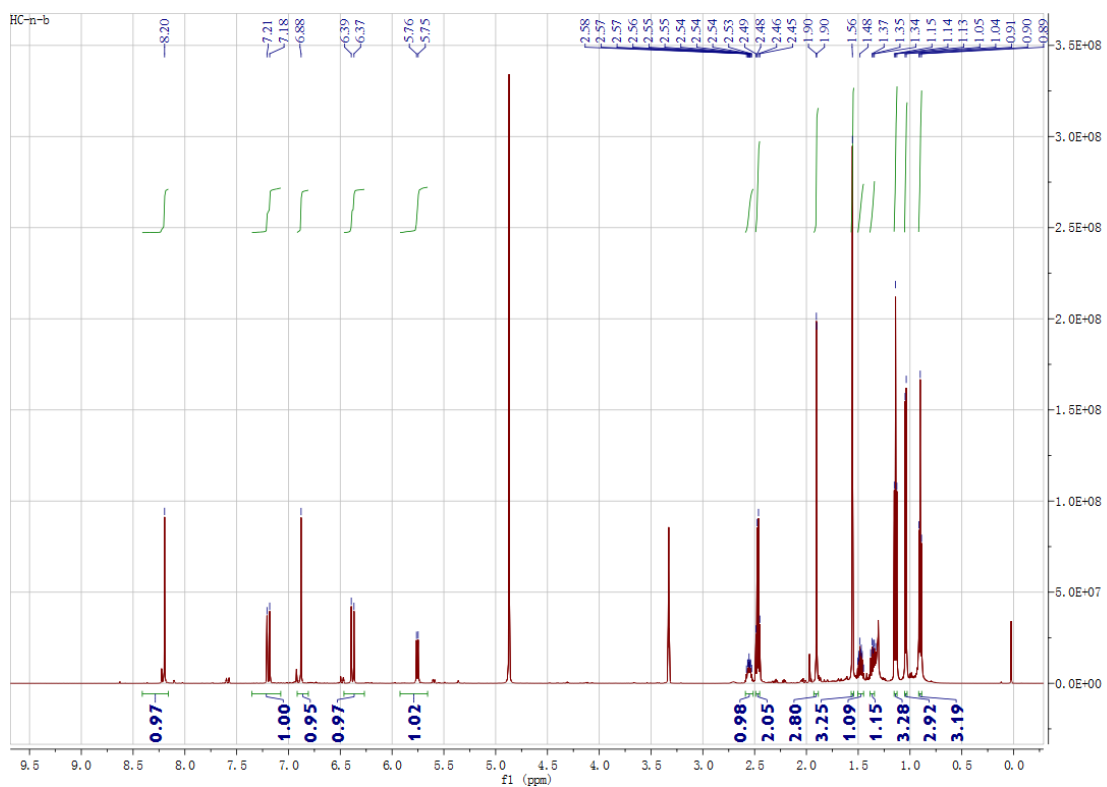

Fig.S78.  $^1\text{H}$  NMR (600 MHz,  $\text{CDCl}_3$ ) spectrum of compound 27

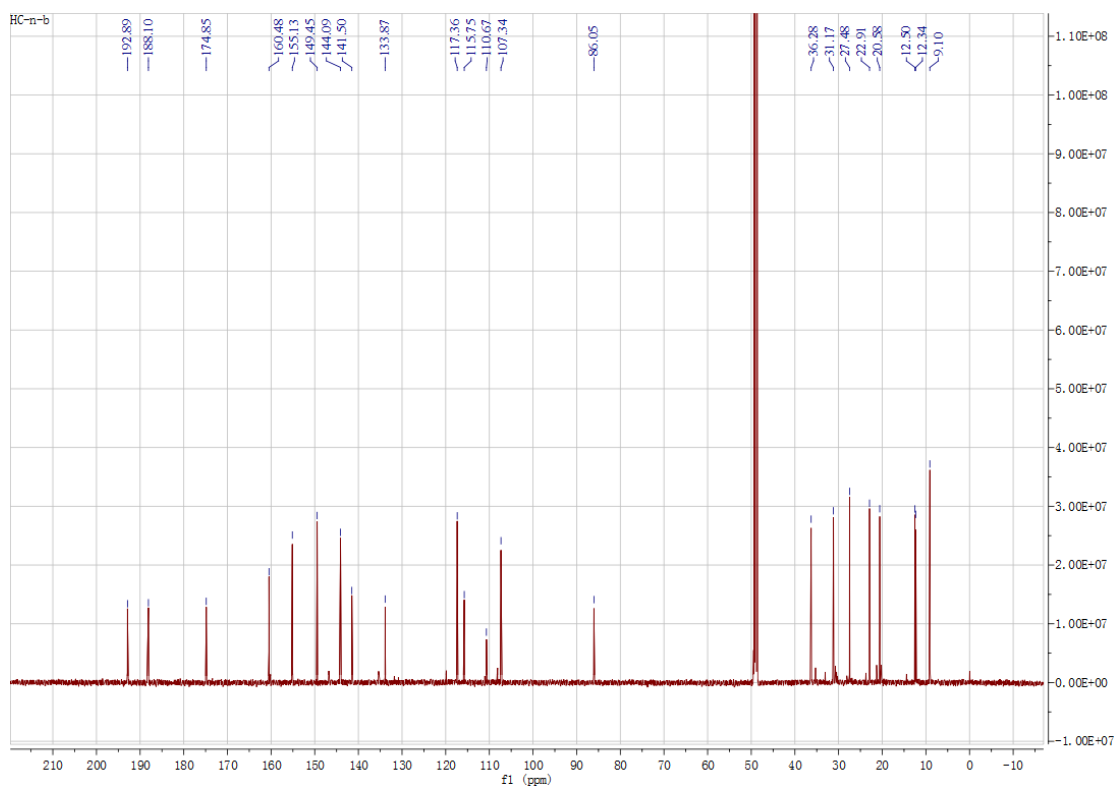

Fig.S79.  $^{13}\text{C}$  NMR (150 MHz,  $\text{CDCl}_3$ ) spectrum of compound 27
